# Supplementary material for: Effects of Varying Levels of Wheat Bran Dietary Fiber on Growth Performance, Fiber Digestibility and Gut Microbiota in Erhualian and Large White Pigs
Source: MDPI journal article supplement (doi:10.3390/microorganisms11102474), 2023-10-01
Supplement: s1 [file s1]

## Supplementary Material

### Effects of varying levels of wheat bran dietary fiber on growth performance, fiber digestibility and gut microbiota in Erhualian and Large White pigs

Taoran Du <sup>1</sup>, Pinghua Li <sup>1,2,3</sup>, Qing Niu <sup>1,4</sup>, Guang Pu <sup>1</sup>, Binbin Wang <sup>1</sup>, Gensheng Liu <sup>1</sup>, Pinghui Li <sup>1</sup>, Peipei Niu <sup>2</sup>, Zongping Zhang <sup>3</sup>, Chengwu Wu <sup>3</sup>, Liming Hou <sup>1,2,3</sup>, Mette Skou Hedemanne <sup>5</sup>, Qingbo Zhao <sup>3</sup> and Ruihua Huang <sup>1,2,3\*</sup>

\* Correspondence: Ruihua Huang: rhhuang@njau.edu.cn

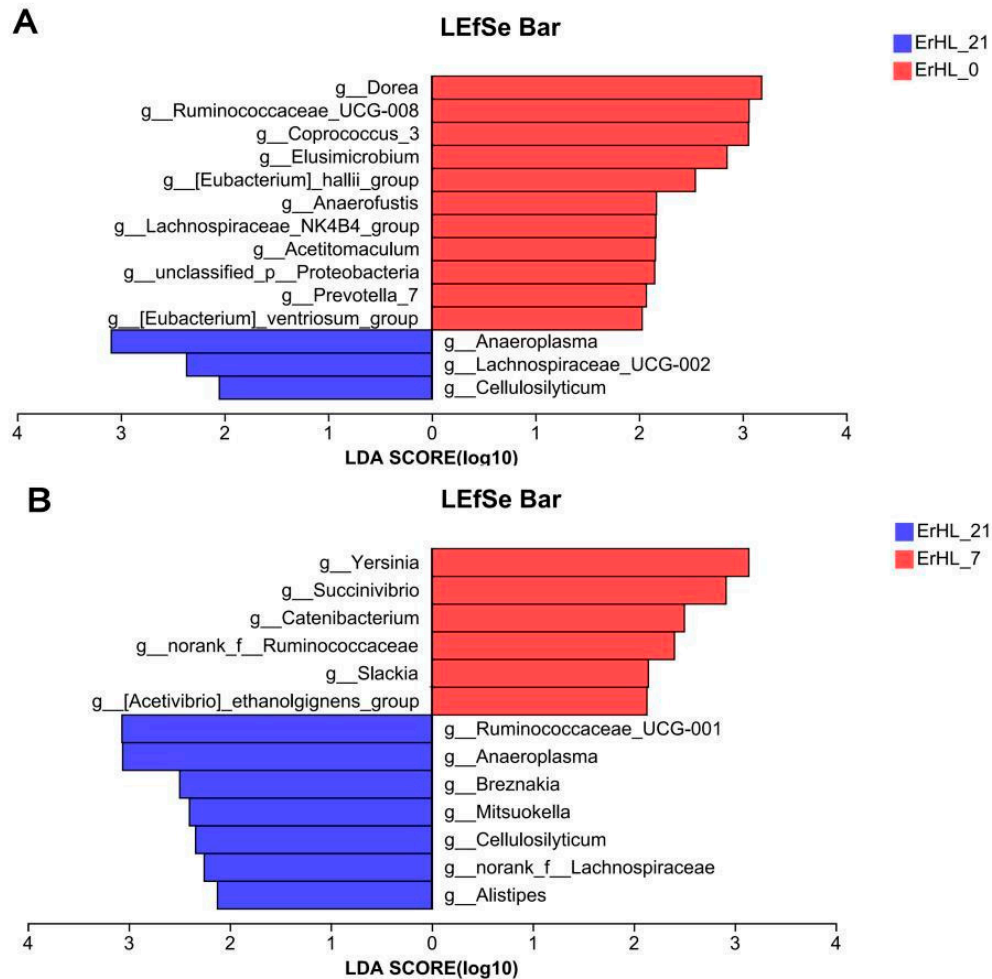

**Figure S1.** Linear discriminant analysis (LDA) effect size (LEfSe) on genera level of cecum microbiota of Er-HL between ErHL-0, ErHL-21 group (A) and ErHL-7, ErHL-21 group (B). ErHL\_0 = the cecal samples of Erhualian fattening barrows fed with basal diet; ErHL\_7 = the cecal samples of Erhualian fattening barrows fed with 7% wheat bran replaced basal diet; ErHL\_21 = the cecal samples of Erhualian fattening barrows fed with 21% wheat bran replaced basal diet.

## Spearman Correlation Heatmap

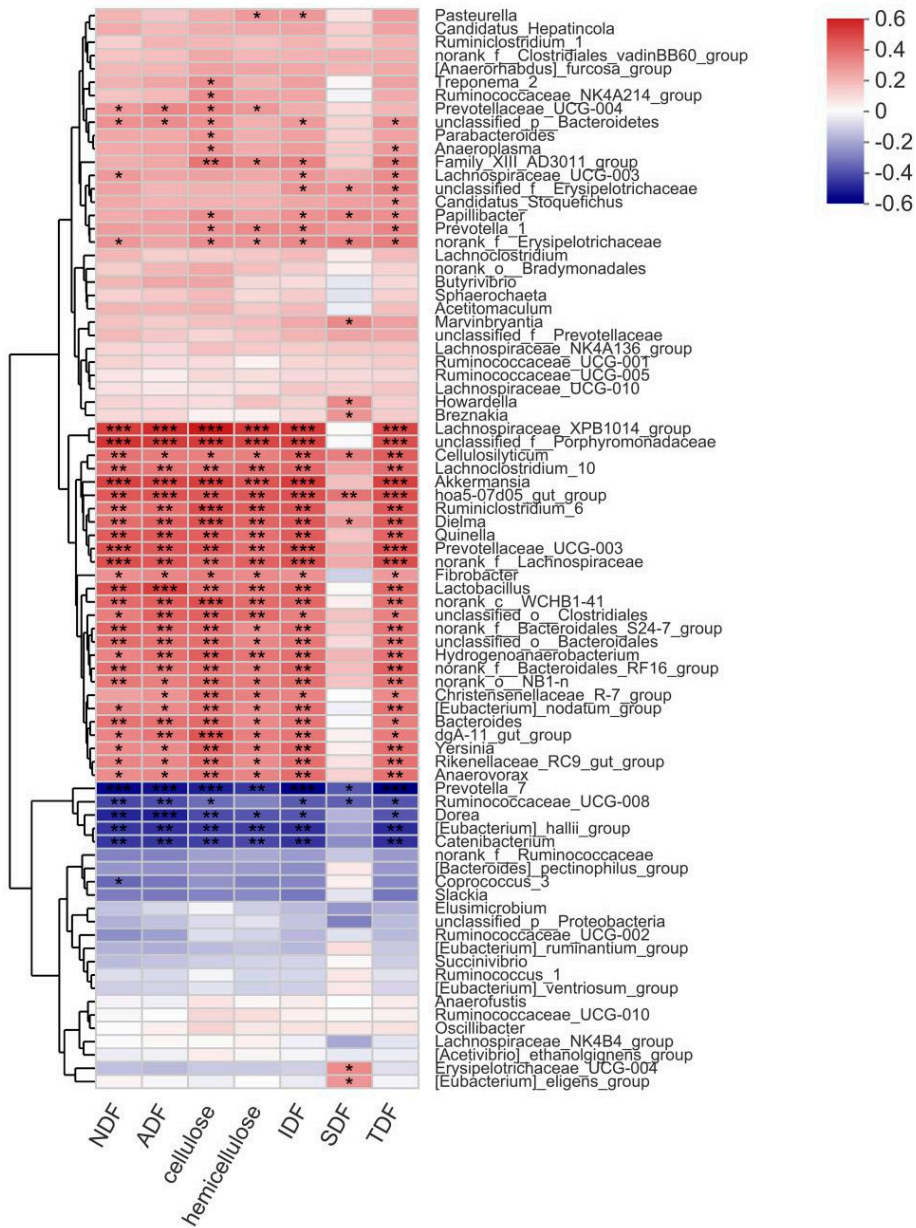

**Figure S2.** Correlation heatmap between potential key bacteria abundance and ATTD of fiber in pigs. \* Means significant correlation ( $p < 0.05$ ). \*\* Means significant correlation ( $p < 0.01$ ). \*\*\* Means significant correlation ( $p < 0.001$ ).
