# Supplementary material
Source: MDPI journal article supplement (https://www.mdpi.com/2076-2607/11/10/2474)
Supplement: s1 [file s1]

Archive with 2 entries (2 files):
- Supplementary Material.pdf
- Supplementary tables.xlsx
