# Supplementary material for: Effects of Varying Levels of Wheat Bran Dietary Fiber on Growth Performance, Fiber Digestibility and Gut Microbiota in Erhualian and Large White Pigs
Source: MDPI journal article supplement (doi:10.3390/microorganisms11102474), 2023-10-01
Supplement: s1 [file s1 › Supplementary tables.xlsx]

## Sheet: Table S1
Effects of varying levels of wheat bran dietary fiber on growth performance, fiber digestibility and gut microbiota in Erhualian and Large White pigs
Taoran Du, Pinghua Li , Qing Niu, Guang Pu, Binbin Wang, Gensheng Liu, Pinghui Li, Peipei Niu, Zongping Zhang, Chengwu Wu, Liming Hou, M.S. Hedemanne and Ruihua Huang*
* Correspondence: Ruihua Huang: rhhuang@njau.edu.cn
Table S1 Ingredient composition and analyzed nutrient contents of experimental diets (DM basis)
Item	Diets1)
	Basal	7% WRB	14% WRB	21% WRB	Wheat bran
Ingredient (%)
Corn	70	65.1	60.2	55.3	-
Soybean meal	18	16.74	15.48	14.22	-
Wheat bran	7.5	13.98	20.45	26.93	-
Calciumcarbonate	0.25	0.23	0.22	0.2	-
Sodium bicarbonate	0.25	0.23	0.22	0.2	-
Premix compound2)	4	3.72	3.44	3.16	-
Nutrient level (calculated value)
Metabolic energy (ME kcal/kg)	3129	3063	2997	2931	2190
Crude protein (CP %)	15.1	15.13	15.17	15.2	15.6
Neutral detergent fiber (NDF %)	11.77	13.61	15.45	17.28	38
Calcium (%)	0.65	0.62	0.58	0.54	0.13
Available phosphorus (%)	0.48	0.51	0.54	0.57	0.9
Lysine (%)	0.8	0.79	0.77	0.76	0.61
Methionine + Cystine (%)	0.53	0.53	0.53	0.53	0.56
Nutrient level (measured value)
Neutral detergent fiber (NDF %)	12.84	14.43	15.84	17.38	41.8
Acid detergent fiber (ADF %)	5.13	5.7	6.27	6.76	12.12
Total detergent fiber (TDF %)	14.07	16.32	17.99	18.85	23.08
Insoluble detergent fiber (IDF %)	13.65	15.66	16.9	17.5	22.69
Soluble detergent fiber (SDF %)	0.42	0.66	1.1	1.35	0.39
Crude protein (CP %)	17.42	17.47	17.54	18.12	-
Ether extract (EE %)	6.8	6.81	6.77	6.8	-
1) Basal = Basal diet; 7% WRB = 7% Wheat bran replaced basal diet; 14% WRB = 14% Wheat bran replaced basal diet; 21% WRB = 21% Wheat bran replaced basal diet.
2) The premix provided the following per kg of diets: vitamin A 52 530 IU, vitamin D 3 348 IU, vitamin E 572mg, vitamin K 24 mg, thiamin 41mg, riboflavin 65mg, pantothenic acid 290mg, niacin 325mg, pyridoxine 50mg, biotin 5mg. folic acid 12mg, Choline 6.27mg, linoleic acid 120mg, Fe 34.25 mg, Cu 3.5mg, Zn 8.95 mg, Mn 11.75 mg, Se 5 mg, I 0.12 mg.

## Sheet: Table S2
Effects of varying levels of wheat bran dietary fiber on growth performance, fiber digestibility and gut microbiota in Erhualian and Large White pigs
Taoran Du, Pinghua Li , Qing Niu, Guang Pu, Binbin Wang, Gensheng Liu, Pinghui Li, Peipei Niu, Zongping Zhang, Chengwu Wu, Liming Hou, M.S. Hedemanne and Ruihua Huang*
* Correspondence: Ruihua Huang: rhhuang@njau.edu.cn
Table S2 Linear discriminant analysis (LDA) effect size (LEfSe) of cecum microbiota among ErHL-0, LLW-0 and SLW-0
Phylum	Class	Order	Family	Genus	Species	OTU	Enrichment group	LDA-value	P-value
p__Spirochaetae							LLW_0	4.16552	0.0453399
p__Chlamydiae							SLW_0	2.73847	0.0374822
p__Firmicutes	c__Bacilli						ErHL_0	5.00949	0.00309559
p__Spirochaetae	c__Spirochaetes						LLW_0	4.16552	0.0453399
p__Chlamydiae	c__Chlamydiae						SLW_0	2.73854	0.0374822
p__Proteobacteria	c__Epsilonproteobacteria						SLW_0	4.52728	0.00812455
p__Firmicutes	c__Bacilli	o__Lactobacillales					ErHL_0	5.00997	0.00309559
p__Actinobacteria	c__Actinobacteria	o__Micrococcales					LLW_0	2.01012	0.0311321
p__Spirochaetae	c__Spirochaetes	o__Spirochaetales					LLW_0	4.16552	0.0453399
p__Proteobacteria	c__Gammaproteobacteria	o__Aeromonadales					SLW_0	3.49786	0.0258623
p__Proteobacteria	c__Epsilonproteobacteria	o__Campylobacterales					SLW_0	4.52728	0.00812455
p__Chlamydiae	c__Chlamydiae	o__Chlamydiales					SLW_0	2.73864	0.0374822
p__Bacteroidetes	c__Bacteroidia	o__Bacteroidales	f__Bacteroidaceae				ErHL_0	3.44666	0.0115394
p__Bacteroidetes	c__Bacteroidia	o__Bacteroidales	f__Bacteroidales_RF16_group				ErHL_0	3.5021	0.0243354
p__Bacteroidetes	c__Bacteroidia	o__Bacteroidales	f__Bacteroidales_S24-7_group				ErHL_0	4.52463	0.0453399
p__Firmicutes	c__Bacilli	o__Lactobacillales	f__Lactobacillaceae				ErHL_0	5.0976	0.0137523
p__Bacteroidetes	c__Bacteroidia	o__Bacteroidales	f__Porphyromonadaceae				ErHL_0	3.48421	0.0321097
p__Bacteroidetes	c__Bacteroidia	o__Bacteroidales	f__Rikenellaceae				ErHL_0	3.97494	0.0321097
p__Proteobacteria	c__Epsilonproteobacteria	o__Campylobacterales	f__Campylobacteraceae				LLW_0	4.41622	0.0144955
p__Firmicutes	c__Clostridia	o__Clostridiales	f__Christensenellaceae				LLW_0	3.42616	0.0241096
p__Firmicutes	c__Clostridia	o__Clostridiales	f__Family_XIII				LLW_0	3.27812	0.0277423
p__Firmicutes	c__Clostridia	o__Clostridiales	f__Peptococcaceae				LLW_0	3.30193	0.0107574
p__Firmicutes	c__Clostridia	o__Clostridiales	f__Ruminococcaceae				LLW_0	4.46228	0.0241096
p__Spirochaetae	c__Spirochaetes	o__Spirochaetales	f__Spirochaetaceae				LLW_0	4.16659	0.0453399
p__Chlamydiae	c__Chlamydiae	o__Chlamydiales	f__Chlamydiaceae				SLW_0	2.73858	0.0374822
p__Proteobacteria	c__Epsilonproteobacteria	o__Campylobacterales	f__Helicobacteraceae				SLW_0	3.88537	0.0033794
p__Actinobacteria	c__Actinobacteria	o__Micrococcales	f__Intrasporangiaceae				SLW_0	2.73069	0.0345016
p__Bacteroidetes	c__Bacteroidia	o__Bacteroidales	f__norank_o__Bacteroidales				SLW_0	2.02558	0.00925859
p__Proteobacteria	c__Gammaproteobacteria	o__Aeromonadales	f__Succinivibrionaceae				SLW_0	3.49786	0.0222143
p__Firmicutes	c__Negativicutes	o__Selenomonadales	f__Veillonellaceae				SLW_0	4.38831	0.0102058
p__Firmicutes	c__Clostridia	o__Clostridiales	f__Family_XIII	g__[Eubacterium]_nodatum_group			ErHL_0	2.60428	0.0267858
p__Firmicutes	c__Clostridia	o__Clostridiales	f__Lachnospiraceae	g__Acetitomaculum			ErHL_0	2.36284	0.00350008
p__Firmicutes	c__Clostridia	o__Clostridiales	f__Family_XIII	g__Anaerovorax			ErHL_0	2.04629	0.00554443
p__Bacteroidetes	c__Bacteroidia	o__Bacteroidales	f__Bacteroidaceae	g__Bacteroides			ErHL_0	3.44666	0.0115394
p__Firmicutes	c__Clostridia	o__Clostridiales	f__Lachnospiraceae	g__Lachnospiraceae_UCG-003			ErHL_0	2.39638	0.0495604
p__Firmicutes	c__Clostridia	o__Clostridiales	f__Lachnospiraceae	g__Lachnospiraceae_UCG-010			ErHL_0	2.00666	0.00319886
p__Firmicutes	c__Bacilli	o__Lactobacillales	f__Lactobacillaceae	g__Lactobacillus			ErHL_0	5.0976	0.0137523
p__Firmicutes	c__Clostridia	o__Clostridiales	f__Lachnospiraceae	g__Marvinbryantia			ErHL_0	3.45452	0.0156405
p__Bacteroidetes	c__Bacteroidia	o__Bacteroidales	f__Bacteroidales_RF16_group	g__norank_f__Bacteroidales_RF16_group			ErHL_0	3.5021	0.0243354
p__Bacteroidetes	c__Bacteroidia	o__Bacteroidales	f__Bacteroidales_S24-7_group	g__norank_f__Bacteroidales_S24-7_group			ErHL_0	4.52463	0.0453399
p__Firmicutes	c__Erysipelotrichia	o__Erysipelotrichales	f__Erysipelotrichaceae	g__norank_f__Erysipelotrichaceae			ErHL_0	3.1102	0.0363054
p__Firmicutes	c__Clostridia	o__Clostridiales	f__Lachnospiraceae	g__norank_f__Lachnospiraceae			ErHL_0	2.21863	0.0216911
p__Bacteroidetes	c__Bacteroidia	o__Bacteroidales	f__Porphyromonadaceae	g__Parabacteroides			ErHL_0	3.44635	0.0321097
p__Bacteroidetes	c__Bacteroidia	o__Bacteroidales	f__Prevotellaceae	g__Prevotellaceae_UCG-003			ErHL_0	3.91486	0.0199948
p__Bacteroidetes	c__Bacteroidia	o__Bacteroidales	f__Rikenellaceae	g__Rikenellaceae_RC9_gut_group			ErHL_0	3.9617	0.0241096
p__Firmicutes	c__Clostridia	o__Clostridiales	f__Ruminococcaceae	g__Ruminococcaceae_NK4A214_group			ErHL_0	3.19049	0.0408099
p__Bacteroidetes	c__Bacteroidia	o__Bacteroidales	f__Porphyromonadaceae	g__unclassified_f__Porphyromonadaceae			ErHL_0	2.45762	0.0104937
p__Bacteroidetes	c__Bacteroidia	o__Bacteroidales	f__Prevotellaceae	g__unclassified_f__Prevotellaceae			ErHL_0	3.38502	0.0380442
p__Firmicutes	c__Erysipelotrichia	o__Erysipelotrichales	f__Erysipelotrichaceae	g__[Anaerorhabdus]_furcosa_group			ErHL_0	2.71415	0.0269735
p__Firmicutes	c__Clostridia	o__Clostridiales	f__Lachnospiraceae	g__Cellulosilyticum			ErHL_0	2.86503	0.0287286
p__Firmicutes	c__Clostridia	o__Clostridiales	f__Lachnospiraceae	g__Lachnoclostridium			ErHL_0	2.30793	0.0457945
p__Proteobacteria	c__Gammaproteobacteria	o__Pasteurellales	f__Pasteurellaceae	g__Pasteurella			ErHL_0	2.60308	0.0373432
p__Firmicutes	c__Clostridia	o__Clostridiales	f__Lachnospiraceae	g__[Bacteroides]_pectinophilus_group			LLW_0	2.18415	0.00844574
p__Firmicutes	c__Clostridia	o__Clostridiales	f__Lachnospiraceae	g__[Eubacterium]_eligens_group			LLW_0	2.45781	0.028733
p__Firmicutes	c__Erysipelotrichia	o__Erysipelotrichales	f__Erysipelotrichaceae	g__Asteroleplasma			LLW_0	2.90098	0.00242055
p__Proteobacteria	c__Epsilonproteobacteria	o__Campylobacterales	f__Campylobacteraceae	g__Campylobacter			LLW_0	4.41622	0.0144955
p__Firmicutes	c__Clostridia	o__Clostridiales	f__Ruminococcaceae	g__Candidatus_Soleaferrea			LLW_0	2.46206	0.0039114
p__Firmicutes	c__Clostridia	o__Clostridiales	f__Christensenellaceae	g__Christensenellaceae_R-7_group			LLW_0	3.42693	0.0241096
p__Firmicutes	c__Erysipelotrichia	o__Erysipelotrichales	f__Erysipelotrichaceae	g__Erysipelotrichaceae_UCG-003			LLW_0	2.35544	0.0139946
p__Firmicutes	c__Erysipelotrichia	o__Erysipelotrichales	f__Erysipelotrichaceae	g__Erysipelotrichaceae_UCG-004			LLW_0	3.01185	0.0195326
p__Firmicutes	c__Clostridia	o__Clostridiales	f__Ruminococcaceae	g__Faecalibacterium			LLW_0	3.55223	0.0292416
p__Firmicutes	c__Clostridia	o__Clostridiales	f__Family_XIII	g__Family_XIII_AD3011_group			LLW_0	3.11785	0.0109478
p__Firmicutes	c__Clostridia	o__Clostridiales	f__Lachnospiraceae	g__Lachnospiraceae_AC2044_group			LLW_0	3.04597	0.0474316
p__Firmicutes	c__Clostridia	o__Clostridiales	f__Lachnospiraceae	g__Lachnospiraceae_NK3A20_group			LLW_0	2.20879	0.00294429
p__Firmicutes	c__Clostridia	o__Clostridiales	f__Ruminococcaceae	g__norank_f__Ruminococcaceae			LLW_0	2.73834	0.046959
p__Firmicutes	c__Clostridia	o__Clostridiales	f__Lachnospiraceae	g__Oribacterium			LLW_0	2.71514	0.0363054
p__Firmicutes	c__Clostridia	o__Clostridiales	f__Peptococcaceae	g__Peptococcus			LLW_0	3.29847	0.0107574
p__Bacteroidetes	c__Bacteroidia	o__Bacteroidales	f__Prevotellaceae	g__Prevotellaceae_UCG-004			LLW_0	2.1894	0.0463675
p__Firmicutes	c__Clostridia	o__Clostridiales	f__Ruminococcaceae	g__Ruminiclostridium_5			LLW_0	2.65831	0.0112069
p__Firmicutes	c__Clostridia	o__Clostridiales	f__Ruminococcaceae	g__Ruminococcaceae_UCG-002			LLW_0	3.32327	0.0258623
p__Firmicutes	c__Clostridia	o__Clostridiales	f__Ruminococcaceae	g__Ruminococcaceae_UCG-004			LLW_0	2.93318	0.0497871
p__Firmicutes	c__Clostridia	o__Clostridiales	f__Ruminococcaceae	g__Ruminococcaceae_UCG-005			LLW_0	4.12859	0.017581
p__Firmicutes	c__Clostridia	o__Clostridiales	f__Ruminococcaceae	g__Ruminococcaceae_UCG-010			LLW_0	3.434	0.0408099
p__Actinobacteria	c__Actinobacteria	o__Coriobacteriales	f__Coriobacteriaceae	g__Slackia			LLW_0	2.11908	0.0316698
p__Spirochaetae	c__Spirochaetes	o__Spirochaetales	f__Spirochaetaceae	g__Sphaerochaeta			LLW_0	3.40213	0.0297591
p__Synergistetes	c__Synergistia	o__Synergistales	f__Synergistaceae	g__Pyramidobacter			LLW_0	2.2231	0.0251543
p__Spirochaetae	c__Spirochaetes	o__Spirochaetales	f__Spirochaetaceae	g__unclassified_f__Spirochaetaceae			LLW_0	2.28986	0.0476403
p__Firmicutes	c__Negativicutes	o__Selenomonadales	f__Veillonellaceae	g__unclassified_f__Veillonellaceae			LLW_0	3.2425	0.00540847
p__Firmicutes	c__Negativicutes	o__Selenomonadales	f__Acidaminococcaceae	g__Acidaminococcus			SLW_0	2.29606	0.0448756
p__Firmicutes	c__Erysipelotrichia	o__Erysipelotrichales	f__Erysipelotrichaceae	g__Catenibacterium			SLW_0	2.86973	0.0267858
p__Chlamydiae	c__Chlamydiae	o__Chlamydiales	f__Chlamydiaceae	g__Chlamydia			SLW_0	2.73844	0.0374822
p__Synergistetes	c__Synergistia	o__Synergistales	f__Synergistaceae	g__Cloacibacillus			SLW_0	2.48095	0.0345016
p__Firmicutes	c__Negativicutes	o__Selenomonadales	f__Veillonellaceae	g__Dialister			SLW_0	3.44329	0.023388
p__Actinobacteria	c__Actinobacteria	o__Coriobacteriales	f__Coriobacteriaceae	g__Enterorhabdus			SLW_0	2.28816	0.00444544
p__Firmicutes	c__Erysipelotrichia	o__Erysipelotrichales	f__Erysipelotrichaceae	g__Erysipelotrichaceae_UCG-006			SLW_0	2.19965	0.00683641
p__Proteobacteria	c__Epsilonproteobacteria	o__Campylobacterales	f__Helicobacteraceae	g__Helicobacter			SLW_0	3.88537	0.0033794
p__Firmicutes	c__Clostridia	o__Clostridiales	f__Lachnospiraceae	g__Lachnospiraceae_FCS020_group			SLW_0	2.42131	0.0363054
p__Firmicutes	c__Negativicutes	o__Selenomonadales	f__Veillonellaceae	g__Megamonas			SLW_0	3.38208	0.0105728
p__Firmicutes	c__Negativicutes	o__Selenomonadales	f__Veillonellaceae	g__Megasphaera			SLW_0	3.96351	0.00283328
p__Bacteroidetes	c__Bacteroidia	o__Bacteroidales	f__Prevotellaceae	g__norank_f__Prevotellaceae			SLW_0	3.77737	0.0380442
p__Firmicutes	c__Negativicutes	o__Selenomonadales	f__Veillonellaceae	g__norank_f__Veillonellaceae			SLW_0	3.28357	0.00320359
p__Bacteroidetes	c__Bacteroidia	o__Bacteroidales	f__norank_o__Bacteroidales	g__norank_o__Bacteroidales			SLW_0	2.02558	0.00925859
p__Actinobacteria	c__Actinobacteria	o__Coriobacteriales	f__Coriobacteriaceae	g__Olsenella			SLW_0	2.85678	0.0137523
p__Bacteroidetes	c__Bacteroidia	o__Bacteroidales	f__Prevotellaceae	g__Prevotella_7			SLW_0	3.41702	0.0147094
p__Bacteroidetes	c__Bacteroidia	o__Bacteroidales	f__Prevotellaceae	g__Prevotella_9			SLW_0	4.58364	0.0453399
p__Firmicutes	c__Clostridia	o__Clostridiales	f__Ruminococcaceae	g__Ruminococcaceae_UCG-008			SLW_0	3.70591	0.0380442
p__Firmicutes	c__Clostridia	o__Clostridiales	f__Ruminococcaceae	g__Subdoligranulum			SLW_0	3.80976	0.0363054
p__Proteobacteria	c__Gammaproteobacteria	o__Aeromonadales	f__Succinivibrionaceae	g__Succinivibrio			SLW_0	3.44725	0.0199948
p__Actinobacteria	c__Actinobacteria	o__Micrococcales	f__Intrasporangiaceae	g__unclassified_f__Intrasporangiaceae			SLW_0	2.71582	0.0345016
p__Firmicutes	c__Negativicutes	o__Selenomonadales	f__Veillonellaceae	g__Veillonella			SLW_0	2.37304	0.0232818
p__Firmicutes	c__Negativicutes	o__Selenomonadales	f__Acidaminococcaceae	g__Acidaminococcus	s__Acidaminococcus_fermentans_DSM_20731		ErHL_0	2.04425	0.00153001
p__Proteobacteria	c__Epsilonproteobacteria	o__Campylobacterales	f__Campylobacteraceae	g__Campylobacter	s__Campylobacter_hyointestinalis_subsp__lawsonii		ErHL_0	4.8385	0.00706066
p__Proteobacteria	c__Epsilonproteobacteria	o__Campylobacterales	f__Campylobacteraceae	g__Campylobacter	s__Campylobacter_jejuni_subsp__jejuni		ErHL_0	2.42766	0.0104937
p__Chlamydiae	c__Chlamydiae	o__Chlamydiales	f__Chlamydiaceae	g__Chlamydia	s__Chlamydia_suis		ErHL_0	3.38502	0.0380442
p__Firmicutes	c__Clostridia	o__Clostridiales	f__Lachnospiraceae	g__Dorea	s__Dorea_formicigenerans_ATCC_27755		ErHL_0	2.95616	0.0319225
p__Firmicutes	c__Clostridia	o__Clostridiales	f__Ruminococcaceae	g__[Eubacterium]_coprostanoligenes_group	s__Eubacterium_coprostanoligenes		ErHL_0	3.30598	0.0469182
p__Firmicutes	c__Clostridia	o__Clostridiales	f__Lachnospiraceae	g__Roseburia	s__Eubacterium_ramulus		ErHL_0	2.85762	0.0491054
p__Proteobacteria	c__Deltaproteobacteria	o__Desulfovibrionales	f__Desulfovibrionaceae	g__Desulfovibrio	s__gut_metagenome_g__Desulfovibrio		ErHL_0	3.04167	0.0104339
p__Firmicutes	c__Bacilli	o__Lactobacillales	f__Lactobacillaceae	g__Lactobacillus	s__Lactobacillus_amylovorus		ErHL_0	2.36586	0.0187137
p__Firmicutes	c__Bacilli	o__Lactobacillales	f__Lactobacillaceae	g__Lactobacillus	s__Lactobacillus_johnsonii		ErHL_0	2.39638	0.0495604
p__Firmicutes	c__Bacilli	o__Lactobacillales	f__Lactobacillaceae	g__Lactobacillus	s__Lactobacillus_ruminis		ErHL_0	2.08857	0.0025973
p__Firmicutes	c__Bacilli	o__Lactobacillales	f__Lactobacillaceae	g__Lactobacillus	s__Lactobacillus_salivarius		ErHL_0	4.49911	0.0123783
p__Firmicutes	c__Negativicutes	o__Selenomonadales	f__Veillonellaceae	g__Megasphaera	s__Megasphaera_elsdenii_DSM_20460		ErHL_0	2.21808	0.0216911
p__Firmicutes	c__Clostridia	o__Clostridiales	f__Ruminococcaceae	g__Ruminococcus_1	s__Ruminococcus_bicirculans		ErHL_0	3.62648	0.0113279
p__Firmicutes	c__Clostridia	o__Clostridiales	f__Ruminococcaceae	g__Ruminococcus_1	s__Ruminococcus_flavefaciens		ErHL_0	3.35947	0.0408099
p__Actinobacteria	c__Actinobacteria	o__Coriobacteriales	f__Coriobacteriaceae	g__Slackia	s__Slackia_isoflavoniconvertens		ErHL_0	2.36284	0.00350008
p__Spirochaetae	c__Spirochaetes	o__Spirochaetales	f__Spirochaetaceae	g__Treponema_2	s__Treponema_berlinense		ErHL_0	2.0449	0.00554443
p__Spirochaetae	c__Spirochaetes	o__Spirochaetales	f__Spirochaetaceae	g__Treponema_2	s__Treponema_porcinum		ErHL_0	2.89671	0.00636737
p__Spirochaetae	c__Spirochaetes	o__Spirochaetales	f__Spirochaetaceae	g__Treponema_2	s__Treponema_succinifaciens_DSM_2489		ErHL_0	2.83162	0.0220848
p__Actinobacteria	c__Actinobacteria	o__Micrococcales	f__Intrasporangiaceae	g__unclassified_f__Intrasporangiaceae	s__unclassified_f__Intrasporangiaceae		ErHL_0	2.91502	0.0208819
p__Bacteroidetes	c__Bacteroidia	o__Bacteroidales	f__Porphyromonadaceae	g__unclassified_f__Porphyromonadaceae	s__unclassified_f__Porphyromonadaceae		ErHL_0	3.38564	0.00968258
p__Bacteroidetes	c__Bacteroidia	o__Bacteroidales	f__Prevotellaceae	g__unclassified_f__Prevotellaceae	s__unclassified_f__Prevotellaceae		ErHL_0	2.4554	0.017289
p__Firmicutes	c__Negativicutes	o__Selenomonadales	f__Veillonellaceae	g__unclassified_f__Veillonellaceae	s__unclassified_f__Veillonellaceae		ErHL_0	3.32772	0.0308464
p__Firmicutes	c__Clostridia	o__Clostridiales	f__Ruminococcaceae	g__Anaerotruncus	s__unclassified_g__Anaerotruncus		ErHL_0	2.3283	0.0400257
p__Firmicutes	c__Erysipelotrichia	o__Erysipelotrichales	f__Erysipelotrichaceae	g__Asteroleplasma	s__unclassified_g__Asteroleplasma		ErHL_0	2.94578	0.0408099
p__Bacteroidetes	c__Bacteroidia	o__Bacteroidales	f__Bacteroidaceae	g__Bacteroides	s__unclassified_g__Bacteroides		ErHL_0	3.21304	0.0163896
p__Actinobacteria	c__Actinobacteria	o__Bifidobacteriales	f__Bifidobacteriaceae	g__Bifidobacterium	s__unclassified_g__Bifidobacterium		ErHL_0	3.17558	0.0120216
p__Firmicutes	c__Clostridia	o__Clostridiales	f__Ruminococcaceae	g__Butyricicoccus	s__unclassified_g__Butyricicoccus		ErHL_0	3.02248	0.0112929
p__Actinobacteria	c__Actinobacteria	o__Coriobacteriales	f__Coriobacteriaceae	g__Collinsella	s__unclassified_g__Collinsella		ErHL_0	3.16174	0.0191929
p__Firmicutes	c__Clostridia	o__Clostridiales	f__Lachnospiraceae	g__Coprococcus_1	s__unclassified_g__Coprococcus_1		ErHL_0	2.20849	0.00869826
p__Proteobacteria	c__Deltaproteobacteria	o__Desulfovibrionales	f__Desulfovibrionaceae	g__Desulfovibrio	s__unclassified_g__Desulfovibrio		LLW_0	3.2241	0.0489212
p__Firmicutes	c__Clostridia	o__Clostridiales	f__Lachnospiraceae	g__Dorea	s__unclassified_g__Dorea		LLW_0	2.61921	0.0474085
p__Firmicutes	c__Clostridia	o__Clostridiales	f__Ruminococcaceae	g__Faecalibacterium	s__unclassified_g__Faecalibacterium		LLW_0	2.50131	0.0408081
p__Firmicutes	c__Clostridia	o__Clostridiales	f__Family_XIII	g__Family_XIII_AD3011_group	s__unclassified_g__Family_XIII_AD3011_group		LLW_0	2.14322	0.0117828
p__Proteobacteria	c__Epsilonproteobacteria	o__Campylobacterales	f__Helicobacteraceae	g__Helicobacter	s__unclassified_g__Helicobacter		LLW_0	2.7243	0.00582729
p__Firmicutes	c__Clostridia	o__Clostridiales	f__Lachnospiraceae	g__Lachnospiraceae_NK3A20_group	s__unclassified_g__Lachnospiraceae_NK3A20_group		LLW_0	3.31417	0.00432024
p__Firmicutes	c__Clostridia	o__Clostridiales	f__Lachnospiraceae	g__Lachnospiraceae_UCG-002	s__unclassified_g__Lachnospiraceae_UCG-002		LLW_0	3.44493	0.0269735
p__Firmicutes	c__Clostridia	o__Clostridiales	f__Lachnospiraceae	g__Lachnospiraceae_UCG-003	s__unclassified_g__Lachnospiraceae_UCG-003		LLW_0	3.24258	0.00540847
p__Firmicutes	c__Clostridia	o__Clostridiales	f__Lachnospiraceae	g__Lachnospiraceae_UCG-010	s__unclassified_g__Lachnospiraceae_UCG-010		LLW_0	2.29049	0.00347969
p__Firmicutes	c__Bacilli	o__Lactobacillales	f__Lactobacillaceae	g__Lactobacillus	s__unclassified_g__Lactobacillus		LLW_0	3.40888	0.0146879
p__Firmicutes	c__Negativicutes	o__Selenomonadales	f__Veillonellaceae	g__Megamonas	s__unclassified_g__Megamonas		LLW_0	3.55223	0.0292416
p__Firmicutes	c__Negativicutes	o__Selenomonadales	f__Veillonellaceae	g__Megasphaera	s__unclassified_g__Megasphaera		LLW_0	3.11363	0.0241096
p__Firmicutes	c__Clostridia	o__Clostridiales	f__Family_XIII	g__Mogibacterium	s__unclassified_g__Mogibacterium		LLW_0	2.2088	0.00294429
p__Bacteroidetes	c__Bacteroidia	o__Bacteroidales	f__Bacteroidales_S24-7_group	g__norank_f__Bacteroidales_S24-7_group	s__unclassified_g__norank_f__Bacteroidales_S24-7_group		LLW_0	4.05893	0.0163896
p__Firmicutes	c__Clostridia	o__Clostridiales	f__Lachnospiraceae	g__norank_f__Lachnospiraceae	s__unclassified_g__norank_f__Lachnospiraceae		LLW_0	2.90175	0.00831683
p__Actinobacteria	c__Actinobacteria	o__Coriobacteriales	f__Coriobacteriaceae	g__Olsenella	s__unclassified_g__Olsenella		LLW_0	2.18477	0.00844574
p__Bacteroidetes	c__Bacteroidia	o__Bacteroidales	f__Prevotellaceae	g__Prevotella_7	s__unclassified_g__Prevotella_7		LLW_0	2.45781	0.028733
p__Bacteroidetes	c__Bacteroidia	o__Bacteroidales	f__Prevotellaceae	g__Prevotella_9	s__unclassified_g__Prevotella_9		LLW_0	2.45727	0.0164376
p__Bacteroidetes	c__Bacteroidia	o__Bacteroidales	f__Prevotellaceae	g__Prevotellaceae_UCG-003	s__unclassified_g__Prevotellaceae_UCG-003		LLW_0	2.78926	0.00220808
p__Bacteroidetes	c__Bacteroidia	o__Bacteroidales	f__Rikenellaceae	g__Rikenellaceae_RC9_gut_group	s__unclassified_g__Rikenellaceae_RC9_gut_group		LLW_0	2.44149	0.00730776
p__Firmicutes	c__Clostridia	o__Clostridiales	f__Ruminococcaceae	g__Ruminococcaceae_UCG-005	s__unclassified_g__Ruminococcaceae_UCG-005		LLW_0	2.35544	0.0139946
p__Firmicutes	c__Clostridia	o__Clostridiales	f__Ruminococcaceae	g__Ruminococcaceae_UCG-010	s__unclassified_g__Ruminococcaceae_UCG-010		LLW_0	2.83481	0.0156405
p__Proteobacteria	c__Gammaproteobacteria	o__Aeromonadales	f__Succinivibrionaceae	g__Succinivibrio	s__unclassified_g__Succinivibrio		LLW_0	2.50701	0.0337042
p__Firmicutes	c__Clostridia	o__Clostridiales	f__Lachnospiraceae	g__[Bacteroides]_pectinophilus_group	s__uncultured_bacterium_g__[Bacteroides]_pectinophilus_group		LLW_0	3.04597	0.0474316
p__Firmicutes	c__Clostridia	o__Clostridiales	f__Lachnospiraceae	g__[Eubacterium]_eligens_group	s__uncultured_bacterium_g__[Eubacterium]_eligens_group		LLW_0	2.52989	0.0188591
p__Firmicutes	c__Clostridia	o__Clostridiales	f__Lachnospiraceae	g__[Eubacterium]_ruminantium_group	s__uncultured_bacterium_g__[Eubacterium]_ruminantium_group		LLW_0	2.67185	0.0363054
p__Firmicutes	c__Clostridia	o__Clostridiales	f__Lachnospiraceae	g__Acetitomaculum	s__uncultured_bacterium_g__Acetitomaculum		LLW_0	3.29847	0.0107574
p__Firmicutes	c__Clostridia	o__Clostridiales	f__Family_XIII	g__Anaerovorax	s__uncultured_bacterium_g__Anaerovorax		LLW_0	2.19093	0.0463675
p__Firmicutes	c__Erysipelotrichia	o__Erysipelotrichales	f__Erysipelotrichaceae	g__Asteroleplasma	s__uncultured_bacterium_g__Asteroleplasma		LLW_0	3.12514	0.028733
p__Bacteroidetes	c__Bacteroidia	o__Bacteroidales	f__Bacteroidaceae	g__Bacteroides	s__uncultured_bacterium_g__Bacteroides		LLW_0	3.23187	0.0297591
p__Firmicutes	c__Clostridia	o__Clostridiales	f__Lachnospiraceae	g__Blautia	s__uncultured_bacterium_g__Blautia		LLW_0	3.31014	0.035466
p__Firmicutes	c__Clostridia	o__Clostridiales	f__Ruminococcaceae	g__Candidatus_Soleaferrea	s__uncultured_bacterium_g__Candidatus_Soleaferrea		LLW_0	2.32457	0.00324299
p__Firmicutes	c__Erysipelotrichia	o__Erysipelotrichales	f__Erysipelotrichaceae	g__Catenibacterium	s__uncultured_bacterium_g__Catenibacterium		LLW_0	2.70237	0.0380442
p__Firmicutes	c__Clostridia	o__Clostridiales	f__Christensenellaceae	g__Christensenellaceae_R-7_group	s__uncultured_bacterium_g__Christensenellaceae_R-7_group		LLW_0	2.42269	0.0448756
p__Firmicutes	c__Negativicutes	o__Selenomonadales	f__Veillonellaceae	g__Dialister	s__uncultured_bacterium_g__Dialister		LLW_0	2.06395	0.0291602
p__Actinobacteria	c__Actinobacteria	o__Coriobacteriales	f__Coriobacteriaceae	g__Enterorhabdus	s__uncultured_bacterium_g__Enterorhabdus		SLW_0	2.28974	0.0448756
p__Firmicutes	c__Erysipelotrichia	o__Erysipelotrichales	f__Erysipelotrichaceae	g__Erysipelotrichaceae_UCG-003	s__uncultured_bacterium_g__Erysipelotrichaceae_UCG-003		SLW_0	4.39921	0.0106323
p__Firmicutes	c__Erysipelotrichia	o__Erysipelotrichales	f__Erysipelotrichaceae	g__Erysipelotrichaceae_UCG-004	s__uncultured_bacterium_g__Erysipelotrichaceae_UCG-004		SLW_0	2.66169	0.00695679
p__Firmicutes	c__Erysipelotrichia	o__Erysipelotrichales	f__Erysipelotrichaceae	g__Erysipelotrichaceae_UCG-006	s__uncultured_bacterium_g__Erysipelotrichaceae_UCG-006		SLW_0	2.73857	0.0374822
p__Firmicutes	c__Clostridia	o__Clostridiales	f__Family_XIII	g__Family_XIII_UCG-001	s__uncultured_bacterium_g__Family_XIII_UCG-001		SLW_0	3.37484	0.0024643
p__Firmicutes	c__Clostridia	o__Clostridiales	f__Lachnospiraceae	g__Lachnospiraceae_AC2044_group	s__uncultured_bacterium_g__Lachnospiraceae_AC2044_group		SLW_0	4.65573	0.0232783
p__Firmicutes	c__Clostridia	o__Clostridiales	f__Lachnospiraceae	g__Lachnospiraceae_FCS020_group	s__uncultured_bacterium_g__Lachnospiraceae_FCS020_group		SLW_0	2.12459	0.0287286
p__Firmicutes	c__Bacilli	o__Lactobacillales	f__Lactobacillaceae	g__Lactobacillus	s__uncultured_bacterium_g__Lactobacillus		SLW_0	2.34437	0.00431468
p__Firmicutes	c__Clostridia	o__Clostridiales	f__Lachnospiraceae	g__Marvinbryantia	s__uncultured_bacterium_g__Marvinbryantia		SLW_0	3.90274	0.00283328
p__Firmicutes	c__Negativicutes	o__Selenomonadales	f__Veillonellaceae	g__Megasphaera	s__uncultured_bacterium_g__Megasphaera		SLW_0	2.13759	0.0319959
p__Firmicutes	c__Clostridia	o__Clostridiales	f__Family_XIII	g__Mogibacterium	s__uncultured_bacterium_g__Mogibacterium		SLW_0	2.60908	0.0345016
p__Bacteroidetes	c__Bacteroidia	o__Bacteroidales	f__Bacteroidales_RF16_group	g__norank_f__Bacteroidales_RF16_group	s__uncultured_bacterium_g__norank_f__Bacteroidales_RF16_group		SLW_0	2.02563	0.0308703
p__Firmicutes	c__Clostridia	o__Clostridiales	f__Clostridiales_vadinBB60_group	g__norank_f__Clostridiales_vadinBB60_group	s__uncultured_bacterium_g__norank_f__Clostridiales_vadinBB60_group		SLW_0	3.11364	0.0489212
p__Bacteroidetes	c__Bacteroidia	o__Bacteroidales	f__Prevotellaceae	g__norank_f__Prevotellaceae	s__uncultured_bacterium_g__norank_f__Prevotellaceae		SLW_0	3.88537	0.0033794
p__Bacteroidetes	c__Bacteroidia	o__Bacteroidales	f__norank_o__Bacteroidales	g__norank_o__Bacteroidales	s__uncultured_bacterium_g__norank_o__Bacteroidales		SLW_0	2.36713	0.0393492
p__Firmicutes	c__Clostridia	o__Clostridiales	f__Lachnospiraceae	g__Oribacterium	s__uncultured_bacterium_g__Oribacterium		SLW_0	4.45362	0.00447452
p__Firmicutes	c__Clostridia	o__Clostridiales	f__Ruminococcaceae	g__Oscillibacter	s__uncultured_bacterium_g__Oscillibacter		SLW_0	3.38223	0.0105728
p__Firmicutes	c__Clostridia	o__Clostridiales	f__Peptococcaceae	g__Peptococcus	s__uncultured_bacterium_g__Peptococcus		SLW_0	3.06095	0.00266008
p__Bacteroidetes	c__Bacteroidia	o__Bacteroidales	f__Prevotellaceae	g__Prevotella_7	s__uncultured_bacterium_g__Prevotella_7		SLW_0	2.26758	0.0489212
p__Bacteroidetes	c__Bacteroidia	o__Bacteroidales	f__Prevotellaceae	g__Prevotella_9	s__uncultured_bacterium_g__Prevotella_9		SLW_0	2.84774	0.0106323
p__Bacteroidetes	c__Bacteroidia	o__Bacteroidales	f__Prevotellaceae	g__Prevotellaceae_UCG-004	s__uncultured_bacterium_g__Prevotellaceae_UCG-004		SLW_0	3.28064	0.0287538
p__Firmicutes	c__Clostridia	o__Clostridiales	f__Ruminococcaceae	g__Ruminococcaceae_UCG-002	s__uncultured_bacterium_g__Ruminococcaceae_UCG-002		SLW_0	3.24392	0.0075541
p__Firmicutes	c__Clostridia	o__Clostridiales	f__Ruminococcaceae	g__Ruminococcaceae_UCG-008	s__uncultured_bacterium_g__Ruminococcaceae_UCG-008		SLW_0	3.18312	0.0176999
p__Firmicutes	c__Clostridia	o__Clostridiales	f__Ruminococcaceae	g__Ruminococcaceae_UCG-014	s__uncultured_bacterium_g__Ruminococcaceae_UCG-014		SLW_0	2.44764	0.0150293
p__Firmicutes	c__Erysipelotrichia	o__Erysipelotrichales	f__Erysipelotrichaceae	g__Solobacterium	s__uncultured_bacterium_g__Solobacterium		SLW_0	2.86973	0.0267858
p__Spirochaetae	c__Spirochaetes	o__Spirochaetales	f__Spirochaetaceae	g__Sphaerochaeta	s__uncultured_bacterium_g__Sphaerochaeta		SLW_0	3.44216	0.023388
p__Firmicutes	c__Clostridia	o__Clostridiales	f__Ruminococcaceae	g__Subdoligranulum	s__uncultured_bacterium_g__Subdoligranulum		SLW_0	2.12013	0.0122716
p__Proteobacteria	c__Gammaproteobacteria	o__Aeromonadales	f__Succinivibrionaceae	g__Succinivibrio	s__uncultured_bacterium_g__Succinivibrio		SLW_0	2.20359	0.00683641
p__Bacteroidetes	c__Bacteroidia	o__Bacteroidales	f__Rikenellaceae	g__Rikenellaceae_RC9_gut_group	s__uncultured_beta_proteobacterium_g__Rikenellaceae_RC9_gut_group		SLW_0	2.18892	0.0398022
p__Firmicutes	c__Clostridia	o__Clostridiales	f__Lachnospiraceae	g__Roseburia	s__uncultured_Lachnospiraceae_bacterium_g__Roseburia		SLW_0	2.31721	0.00854298
p__Bacteroidetes	c__Bacteroidia	o__Bacteroidales	f__Prevotellaceae	g__Alloprevotella	s__uncultured_organism_g__Alloprevotella		SLW_0	3.77737	0.0380442
p__Firmicutes	c__Clostridia	o__Clostridiales	f__Ruminococcaceae	g__Anaerotruncus	s__uncultured_organism_g__Anaerotruncus		SLW_0	2.02558	0.00925859
p__Synergistetes	c__Synergistia	o__Synergistales	f__Synergistaceae	g__Cloacibacillus	s__uncultured_organism_g__Cloacibacillus		SLW_0	2.85318	0.00877657
p__Firmicutes	c__Clostridia	o__Clostridiales	f__Christensenellaceae	g__Christensenellaceae_R-7_group	s__uncultured_prokaryote_g__Christensenellaceae_R-7_group		SLW_0	4.56327	0.0453399
p__Firmicutes	c__Clostridia	o__Clostridiales	f__Ruminococcaceae	g__Ruminococcaceae_UCG-005	s__uncultured_prokaryote_g__Ruminococcaceae_UCG-005		SLW_0	3.70591	0.0380442
p__Spirochaetae	c__Spirochaetes	o__Spirochaetales	f__Spirochaetaceae	g__Sphaerochaeta	s__uncultured_prokaryote_g__Sphaerochaeta		SLW_0	3.37539	0.00751833
p__Bacteroidetes	c__Bacteroidia	o__Bacteroidales	f__Bacteroidales_RF16_group	g__norank_f__Bacteroidales_RF16_group	s__uncultured_rumen_bacterium_g__norank_f__Bacteroidales_RF16_group		SLW_0	3.85238	0.0178922
p__Firmicutes	c__Clostridia	o__Clostridiales	f__Ruminococcaceae	g__Ruminococcaceae_NK4A214_group	s__uncultured_rumen_bacterium_g__Ruminococcaceae_NK4A214_group		SLW_0	3.10681	0.035466
p__Firmicutes	c__Clostridia	o__Clostridiales	f__Ruminococcaceae	g__Ruminococcaceae_UCG-010	s__uncultured_Ruminococcaceae_bacterium_g__Ruminococcaceae_UCG-010		SLW_0	3.49133	0.0239449
p__Firmicutes	c__Clostridia	o__Clostridiales	f__Ruminococcaceae	g__Ruminococcaceae_UCG-014	s__uncultured_Ruminococcaceae_bacterium_g__Ruminococcaceae_UCG-014		SLW_0	3.18162	0.00373825
p__Firmicutes	c__Erysipelotrichia	o__Erysipelotrichales	f__Erysipelotrichaceae	g__Erysipelotrichaceae_UCG-004	s__unidentified_rumen_bacterium_RFN74		SLW_0	2.46553	0.0345016
p__Firmicutes	c__Negativicutes	o__Selenomonadales	f__Veillonellaceae	g__Veillonella	s__Veillonella_caviae		SLW_0	2.77707	0.0387176
p__Firmicutes	c__Negativicutes	o__Selenomonadales	f__Veillonellaceae	g__norank_f__Veillonellaceae	s__Veillonellaceae_bacterium_DJF_CR19		SLW_0	2.38241	0.0130037
p__Bacteroidetes	c__Bacteroidia	o__Bacteroidales	f__Rikenellaceae	g__Rikenellaceae_RC9_gut_group	s__wallaby_gut_metagenome_g__Rikenellaceae_RC9_gut_group		SLW_0	3.27022	0.0101948
p__Firmicutes	c__Bacilli	o__Lactobacillales	f__Lactobacillaceae	g__Lactobacillus	s__Lactobacillus_amylovorus	OTU1006	ErHL_0	4.66512	0.00471633
p__Firmicutes	c__Clostridia	o__Clostridiales	f__Christensenellaceae	g__Christensenellaceae_R-7_group	s__uncultured_prokaryote_g__Christensenellaceae_R-7_group	OTU1023	ErHL_0	3.06153	0.014752
p__Firmicutes	c__Bacilli	o__Lactobacillales	f__Lactobacillaceae	g__Lactobacillus	s__Lactobacillus_amylovorus	OTU1098	ErHL_0	4.3559	0.0109478
p__Firmicutes	c__Bacilli	o__Lactobacillales	f__Lactobacillaceae	g__Lactobacillus	s__unclassified_g__Lactobacillus	OTU111	ErHL_0	2.61611	0.0425597
p__Bacteroidetes	c__Bacteroidia	o__Bacteroidales	f__Bacteroidales_RF16_group	g__norank_f__Bacteroidales_RF16_group	s__uncultured_bacterium_g__norank_f__Bacteroidales_RF16_group	OTU1114	ErHL_0	3.07866	0.0483131
p__Bacteroidetes	c__Bacteroidia	o__Bacteroidales	f__Prevotellaceae	g__Prevotellaceae_UCG-003	s__unclassified_g__Prevotellaceae_UCG-003	OTU1169	ErHL_0	2.83216	0.0173867
p__Firmicutes	c__Bacilli	o__Lactobacillales	f__Lactobacillaceae	g__Lactobacillus	s__unclassified_g__Lactobacillus	OTU1242	ErHL_0	2.83603	0.00332062
p__Firmicutes	c__Clostridia	o__Clostridiales	f__Lachnospiraceae	g__Dorea	s__unclassified_g__Dorea	OTU1260	ErHL_0	2.36459	0.0187137
p__Bacteroidetes	c__Bacteroidia	o__Bacteroidales	f__Bacteroidales_RF16_group	g__norank_f__Bacteroidales_RF16_group	s__uncultured_rumen_bacterium_g__norank_f__Bacteroidales_RF16_group	OTU127	ErHL_0	2.95502	0.0112929
p__Bacteroidetes	c__Bacteroidia	o__Bacteroidales	f__Bacteroidales_RF16_group	g__norank_f__Bacteroidales_RF16_group	s__uncultured_bacterium_g__norank_f__Bacteroidales_RF16_group	OTU130	ErHL_0	2.48569	0.0216911
p__Firmicutes	c__Bacilli	o__Lactobacillales	f__Lactobacillaceae	g__Lactobacillus	s__unclassified_g__Lactobacillus	OTU1319	ErHL_0	3.47618	0.0220848
p__Firmicutes	c__Bacilli	o__Lactobacillales	f__Lactobacillaceae	g__Lactobacillus	s__unclassified_g__Lactobacillus	OTU1321	ErHL_0	3.33211	0.0417166
p__Firmicutes	c__Bacilli	o__Lactobacillales	f__Lactobacillaceae	g__Lactobacillus	s__uncultured_bacterium_g__Lactobacillus	OTU1322	ErHL_0	2.91482	0.0208819
p__Bacteroidetes	c__Bacteroidia	o__Bacteroidales	f__Bacteroidaceae	g__Bacteroides	s__unclassified_g__Bacteroides	OTU1349	ErHL_0	2.63909	0.0221227
p__Firmicutes	c__Clostridia	o__Clostridiales	f__Family_XIII	g__Anaerovorax	s__uncultured_bacterium_g__Anaerovorax	OTU135	ErHL_0	2.05678	0.00554443
p__Firmicutes	c__Clostridia	o__Clostridiales	f__Lachnospiraceae	g__Acetitomaculum	s__uncultured_bacterium_g__Acetitomaculum	OTU138	ErHL_0	2.16544	0.00660478
p__Firmicutes	c__Clostridia	o__Clostridiales	f__Ruminococcaceae	g__unclassified_f__Ruminococcaceae	s__unclassified_f__Ruminococcaceae	OTU145	ErHL_0	2.68778	0.0345016
p__Bacteroidetes	c__Bacteroidia	o__Bacteroidales	f__Rikenellaceae	g__Rikenellaceae_RC9_gut_group	s__uncultured_bacterium_g__Rikenellaceae_RC9_gut_group	OTU149	ErHL_0	2.43507	0.017581
p__Firmicutes	c__Bacilli	o__Lactobacillales	f__Lactobacillaceae	g__Lactobacillus	s__unclassified_g__Lactobacillus	OTU153	ErHL_0	3.0684	0.00966136
p__Bacteroidetes	c__Bacteroidia	o__Bacteroidales	f__Bacteroidales_S24-7_group	g__norank_f__Bacteroidales_S24-7_group	s__unclassified_g__norank_f__Bacteroidales_S24-7_group	OTU160	ErHL_0	4.50012	0.00966136
p__Bacteroidetes	c__Bacteroidia	o__Bacteroidales	f__Prevotellaceae	g__Prevotellaceae_UCG-003	s__unclassified_g__Prevotellaceae_UCG-003	OTU169	ErHL_0	2.79476	0.00340743
p__Firmicutes	c__Clostridia	o__Clostridiales	f__Ruminococcaceae	g__Ruminococcus_1	s__uncultured_Firmicutes_bacterium_g__Ruminococcus_1	OTU176	ErHL_0	2.73969	0.0280063
p__Firmicutes	c__Clostridia	o__Clostridiales	f__Lachnospiraceae	g__Coprococcus_1	s__unclassified_g__Coprococcus_1	OTU177	ErHL_0	3.00221	0.0103846
p__Firmicutes	c__Clostridia	o__Clostridiales	f__Lachnospiraceae	g__Marvinbryantia	s__uncultured_bacterium_g__Marvinbryantia	OTU188	ErHL_0	3.40039	0.00800573
p__Proteobacteria	c__Alphaproteobacteria	o__Rhodospirillales	f__Rhodospirillaceae	g__norank_f__Rhodospirillaceae	s__gut_metagenome_g__norank_f__Rhodospirillaceae	OTU19	ErHL_0	2.0986	0.0418609
p__Bacteroidetes	c__Bacteroidia	o__Bacteroidales	f__Bacteroidaceae	g__Bacteroides	s__unclassified_g__Bacteroides	OTU203	ErHL_0	2.00568	0.00854298
p__Firmicutes	c__Clostridia	o__Clostridiales	f__Christensenellaceae	g__Christensenellaceae_R-7_group	s__unclassified_g__Christensenellaceae_R-7_group	OTU215	ErHL_0	2.10485	0.0301102
p__Firmicutes	c__Clostridia	o__Clostridiales	f__Christensenellaceae	g__Christensenellaceae_R-7_group	s__unclassified_g__Christensenellaceae_R-7_group	OTU229	ErHL_0	2.05794	0.0345016
p__Bacteroidetes	c__Bacteroidia	o__Bacteroidales	f__Bacteroidales_S24-7_group	g__norank_f__Bacteroidales_S24-7_group	s__uncultured_bacterium_g__norank_f__Bacteroidales_S24-7_group	OTU235	ErHL_0	2.13913	0.0488651
p__Firmicutes	c__Clostridia	o__Clostridiales	f__Clostridiales_vadinBB60_group	g__norank_f__Clostridiales_vadinBB60_group	s__unclassified_g__norank_f__Clostridiales_vadinBB60_group	OTU237	ErHL_0	2.59493	0.00854298
p__Bacteroidetes	c__Bacteroidia	o__Bacteroidales	f__Rikenellaceae	g__Rikenellaceae_RC9_gut_group	s__uncultured_bacterium_g__Rikenellaceae_RC9_gut_group	OTU238	ErHL_0	3.27685	0.00581869
p__Bacteroidetes	c__Bacteroidia	o__Bacteroidales	f__Porphyromonadaceae	g__unclassified_f__Porphyromonadaceae	s__unclassified_f__Porphyromonadaceae	OTU240	ErHL_0	2.46462	0.0104937
p__Tenericutes	c__Mollicutes	o__Mollicutes_RF9	f__norank_o__Mollicutes_RF9	g__norank_o__Mollicutes_RF9	s__unclassified_g__norank_o__Mollicutes_RF9	OTU243	ErHL_0	2.09772	0.0061477
p__Firmicutes	c__Clostridia	o__Clostridiales	f__Lachnospiraceae	g__Coprococcus_1	s__unclassified_g__Coprococcus_1	OTU247	ErHL_0	2.16149	0.00713227
p__Spirochaetae	c__Spirochaetes	o__Spirochaetales	f__Spirochaetaceae	g__Treponema_2	s__unclassified_g__Treponema_2	OTU248	ErHL_0	2.64566	0.0157087
p__Bacteroidetes	c__Bacteroidia	o__Bacteroidales	f__Prevotellaceae	g__unclassified_f__Prevotellaceae	s__unclassified_f__Prevotellaceae	OTU255	ErHL_0	2.82475	0.000314533
p__Bacteroidetes	c__Bacteroidia	o__Bacteroidales	f__Prevotellaceae	g__Prevotellaceae_NK3B31_group	s__uncultured_bacterium_g__Prevotellaceae_NK3B31_group	OTU257	ErHL_0	2.87346	0.0303538
p__Bacteroidetes	c__Bacteroidia	o__Bacteroidales	f__Rikenellaceae	g__Rikenellaceae_RC9_gut_group	s__unclassified_g__Rikenellaceae_RC9_gut_group	OTU262	ErHL_0	2.40438	0.0384465
p__Firmicutes	c__Clostridia	o__Clostridiales	f__Ruminococcaceae	g__Ruminococcaceae_UCG-005	s__uncultured_prokaryote_g__Ruminococcaceae_UCG-005	OTU263	ErHL_0	3.1397	0.0199948
p__Firmicutes	c__Clostridia	o__Clostridiales	f__Ruminococcaceae	g__Ruminococcaceae_UCG-013	s__uncultured_bacterium_g__Ruminococcaceae_UCG-013	OTU265	ErHL_0	2.03586	0.0480723
p__Bacteroidetes	c__Bacteroidia	o__Bacteroidales	f__Prevotellaceae	g__unclassified_f__Prevotellaceae	s__unclassified_f__Prevotellaceae	OTU266	ErHL_0	2.16004	0.04253
p__Bacteroidetes	c__Bacteroidia	o__Bacteroidales	f__Prevotellaceae	g__Prevotellaceae_NK3B31_group	s__uncultured_bacterium_g__Prevotellaceae_NK3B31_group	OTU272	ErHL_0	2.98538	0.0375419
p__Bacteroidetes	c__Bacteroidia	o__Bacteroidales	f__Rikenellaceae	g__Rikenellaceae_RC9_gut_group	s__unclassified_g__Rikenellaceae_RC9_gut_group	OTU286	ErHL_0	3.16621	0.0404151
p__Bacteroidetes	c__Bacteroidia	o__Bacteroidales	f__Bacteroidales_RF16_group	g__norank_f__Bacteroidales_RF16_group	s__uncultured_rumen_bacterium_g__norank_f__Bacteroidales_RF16_group	OTU287	ErHL_0	2.20504	0.0104403
p__Bacteroidetes	c__Bacteroidia	o__Bacteroidales	f__Bacteroidales_RF16_group	g__norank_f__Bacteroidales_RF16_group	s__uncultured_bacterium_g__norank_f__Bacteroidales_RF16_group	OTU288	ErHL_0	2.87381	0.0408081
p__Bacteroidetes	c__Bacteroidia	o__Bacteroidales	f__Prevotellaceae	g__unclassified_f__Prevotellaceae	s__unclassified_f__Prevotellaceae	OTU291	ErHL_0	2.26118	0.0345016
p__Bacteroidetes	c__Bacteroidia	o__Bacteroidales	f__Prevotellaceae	g__Prevotella_1	s__uncultured_bacterium_g__Prevotella_1	OTU295	ErHL_0	2.36458	0.0242551
p__Tenericutes	c__Mollicutes	o__Mollicutes_RF9	f__norank_o__Mollicutes_RF9	g__norank_o__Mollicutes_RF9	s__uncultured_bacterium_g__norank_o__Mollicutes_RF9	OTU304	ErHL_0	2.86861	0.0345016
p__Bacteroidetes	c__Bacteroidia	o__Bacteroidales	f__Rikenellaceae	g__Rikenellaceae_RC9_gut_group	s__uncultured_bacterium_g__Rikenellaceae_RC9_gut_group	OTU309	ErHL_0	2.06032	0.0461427
p__Bacteroidetes	c__Bacteroidia	o__Bacteroidales	f__Bacteroidales_S24-7_group	g__norank_f__Bacteroidales_S24-7_group	s__uncultured_bacterium_g__norank_f__Bacteroidales_S24-7_group	OTU314	ErHL_0	2.61412	0.0424782
p__Bacteroidetes	c__Bacteroidia	o__Bacteroidales	f__Prevotellaceae	g__unclassified_f__Prevotellaceae	s__unclassified_f__Prevotellaceae	OTU324	ErHL_0	3.32389	0.00534677
p__Bacteroidetes	c__Bacteroidia	o__Bacteroidales	f__unclassified_o__Bacteroidales	g__unclassified_o__Bacteroidales	s__unclassified_o__Bacteroidales	OTU325	ErHL_0	2.08495	0.0339122
p__Bacteroidetes	c__Bacteroidia	o__Bacteroidales	f__Rikenellaceae	g__Rikenellaceae_RC9_gut_group	s__wallaby_gut_metagenome_g__Rikenellaceae_RC9_gut_group	OTU340	ErHL_0	2.20908	0.00869826
p__Spirochaetae	c__Spirochaetes	o__Spirochaetales	f__Spirochaetaceae	g__Treponema_2	s__uncultured_bacterium_g__Treponema_2	OTU343	ErHL_0	3.48626	0.00407532
p__Spirochaetae	c__Spirochaetes	o__Spirochaetales	f__Spirochaetaceae	g__Treponema_2	s__unclassified_g__Treponema_2	OTU345	ErHL_0	3.16364	0.0419366
p__Firmicutes	c__Clostridia	o__Clostridiales	f__Lachnospiraceae	g__Marvinbryantia	s__uncultured_bacterium_g__Marvinbryantia	OTU348	ErHL_0	2.03327	0.0128753
p__Bacteroidetes	c__Bacteroidia	o__Bacteroidales	f__Rikenellaceae	g__Rikenellaceae_RC9_gut_group	s__uncultured_bacterium_g__Rikenellaceae_RC9_gut_group	OTU358	ErHL_0	3.09817	0.0168349
p__Firmicutes	c__Clostridia	o__Clostridiales	f__Ruminococcaceae	g__Ruminococcaceae_NK4A214_group	s__uncultured_rumen_bacterium_g__Ruminococcaceae_NK4A214_group	OTU359	ErHL_0	3.16174	0.0191929
p__Firmicutes	c__Clostridia	o__Clostridiales	f__Ruminococcaceae	g__unclassified_f__Ruminococcaceae	s__unclassified_f__Ruminococcaceae	OTU376	ErHL_0	2.22213	0.00787705
p__Bacteroidetes	c__Bacteroidia	o__Bacteroidales	f__Prevotellaceae	g__Prevotellaceae_UCG-003	s__unclassified_g__Prevotellaceae_UCG-003	OTU380	ErHL_0	2.58178	0.0278957
p__Firmicutes	c__Clostridia	o__Clostridiales	f__Lachnospiraceae	g__unclassified_f__Lachnospiraceae	s__unclassified_f__Lachnospiraceae	OTU392	ErHL_0	2.21517	0.0345016
p__Firmicutes	c__Clostridia	o__Clostridiales	f__Ruminococcaceae	g__Anaerotruncus	s__unclassified_g__Anaerotruncus	OTU393	ErHL_0	2.51045	0.00559911
p__Firmicutes	c__Clostridia	o__Clostridiales	f__Family_XIII	g__Mogibacterium	s__uncultured_bacterium_g__Mogibacterium	OTU398	ErHL_0	2.4554	0.017289
p__Firmicutes	c__Clostridia	o__Clostridiales	f__Lachnospiraceae	g__unclassified_f__Lachnospiraceae	s__unclassified_f__Lachnospiraceae	OTU410	ErHL_0	2.75415	0.0144955
p__Firmicutes	c__Clostridia	o__Clostridiales	f__Family_XIII	g__Family_XIII_AD3011_group	s__unclassified_g__Family_XIII_AD3011_group	OTU415	ErHL_0	2.19237	0.000598014
p__Firmicutes	c__Clostridia	o__Clostridiales	f__Lachnospiraceae	g__Lachnoclostridium	s__unclassified_g__Lachnoclostridium	OTU421	ErHL_0	2.29949	0.0161488
p__Tenericutes	c__Mollicutes	o__NB1-n	f__norank_o__NB1-n	g__norank_o__NB1-n	s__uncultured_bacterium_g__norank_o__NB1-n	OTU425	ErHL_0	2.36362	0.0345016
p__Firmicutes	c__Clostridia	o__Clostridiales	f__Ruminococcaceae	g__Ruminococcaceae_UCG-010	s__uncultured_bacterium_g__Ruminococcaceae_UCG-010	OTU429	ErHL_0	2.04336	0.0179678
p__Firmicutes	c__Clostridia	o__Clostridiales	f__Lachnospiraceae	g__Roseburia	s__Eubacterium_ramulus	OTU430	ErHL_0	2.04068	0.00153001
p__Firmicutes	c__Clostridia	o__Clostridiales	f__Lachnospiraceae	g__norank_f__Lachnospiraceae	s__unclassified_g__norank_f__Lachnospiraceae	OTU439	ErHL_0	2.21876	0.0216911
p__Actinobacteria	c__Actinobacteria	o__Bifidobacteriales	f__Bifidobacteriaceae	g__Bifidobacterium	s__unclassified_g__Bifidobacterium	OTU45	ErHL_0	2.84841	0.00854298
p__Firmicutes	c__Clostridia	o__Clostridiales	f__Lachnospiraceae	g__unclassified_f__Lachnospiraceae	s__unclassified_f__Lachnospiraceae	OTU459	ErHL_0	2.80177	0.0090634
p__Bacteroidetes	c__Bacteroidia	o__Bacteroidales	f__Rikenellaceae	g__Rikenellaceae_RC9_gut_group	s__unclassified_g__Rikenellaceae_RC9_gut_group	OTU484	ErHL_0	2.02295	0.0345016
p__Firmicutes	c__Clostridia	o__Clostridiales	f__Ruminococcaceae	g__unclassified_f__Ruminococcaceae	s__unclassified_f__Ruminococcaceae	OTU490	ErHL_0	2.20132	0.00778418
p__Firmicutes	c__Clostridia	o__Clostridiales	f__Christensenellaceae	g__Christensenellaceae_R-7_group	s__uncultured_bacterium_g__Christensenellaceae_R-7_group	OTU492	ErHL_0	2.63116	0.0276803
p__Firmicutes	c__Clostridia	o__Clostridiales	f__Ruminococcaceae	g__Ruminiclostridium_6	s__uncultured_bacterium_g__Ruminiclostridium_6	OTU515	ErHL_0	2.72619	0.0286882
p__Firmicutes	c__Clostridia	o__Clostridiales	f__Lachnospiraceae	g__Lachnospiraceae_UCG-010	s__unclassified_g__Lachnospiraceae_UCG-010	OTU522	ErHL_0	2.01865	0.0491054
p__Cyanobacteria	c__Cyanobacteria	o__Gastranaerophilales	f__norank_o__Gastranaerophilales	g__norank_o__Gastranaerophilales	s__uncultured_bacterium_g__norank_o__Gastranaerophilales	OTU540	ErHL_0	2.0071	0.00807232
p__Cyanobacteria	c__Cyanobacteria	o__Gastranaerophilales	f__norank_o__Gastranaerophilales	g__norank_o__Gastranaerophilales	s__uncultured_bacterium_g__norank_o__Gastranaerophilales	OTU542	ErHL_0	2.63133	0.0104403
p__Firmicutes	c__Clostridia	o__Clostridiales	f__Lachnospiraceae	g__Lachnospiraceae_UCG-003	s__unclassified_g__Lachnospiraceae_UCG-003	OTU546	ErHL_0	2.39638	0.0495604
p__Bacteroidetes	c__Bacteroidia	o__Bacteroidales	f__Prevotellaceae	g__Prevotellaceae_NK3B31_group	s__uncultured_bacterium_g__Prevotellaceae_NK3B31_group	OTU547	ErHL_0	3.4163	0.0361533
p__Bacteroidetes	c__Bacteroidia	o__Bacteroidales	f__Bacteroidaceae	g__Bacteroides	s__uncultured_bacterium_g__Bacteroides	OTU550	ErHL_0	2.90022	0.00907712
p__Bacteroidetes	c__Bacteroidia	o__Bacteroidales	f__Porphyromonadaceae	g__Parabacteroides	s__uncultured_bacterium_g__Parabacteroides	OTU555	ErHL_0	2.80584	0.0125439
p__Firmicutes	c__Clostridia	o__Clostridiales	f__Ruminococcaceae	g__Oscillibacter	s__uncultured_bacterium_g__Oscillibacter	OTU56	ErHL_0	2.3283	0.0400257
p__Firmicutes	c__Clostridia	o__Clostridiales	f__Ruminococcaceae	g__unclassified_f__Ruminococcaceae	s__unclassified_f__Ruminococcaceae	OTU580	ErHL_0	2.5264	0.0345016
p__Bacteroidetes	c__Bacteroidia	o__Bacteroidales	f__Bacteroidales_S24-7_group	g__norank_f__Bacteroidales_S24-7_group	s__uncultured_bacterium_g__norank_f__Bacteroidales_S24-7_group	OTU582	ErHL_0	2.94578	0.0165298
p__Bacteroidetes	c__Bacteroidia	o__Bacteroidales	f__Porphyromonadaceae	g__Parabacteroides	s__Porphyromonadaceae_bacterium_DJF_B175	OTU584	ErHL_0	2.35752	0.0157568
p__Bacteroidetes	c__Bacteroidia	o__Bacteroidales	f__Prevotellaceae	g__Prevotellaceae_NK3B31_group	s__uncultured_bacterium_g__Prevotellaceae_NK3B31_group	OTU587	ErHL_0	2.39117	0.016848
p__Bacteroidetes	c__Bacteroidia	o__Bacteroidales	f__Porphyromonadaceae	g__Parabacteroides	s__Porphyromonadaceae_bacterium_DJF_B175	OTU6	ErHL_0	2.26266	0.0388781
p__Spirochaetae	c__Spirochaetes	o__Spirochaetales	f__Spirochaetaceae	g__Treponema_2	s__uncultured_bacterium_g__Treponema_2	OTU645	ErHL_0	2.62937	0.0111802
p__Spirochaetae	c__Spirochaetes	o__Spirochaetales	f__Spirochaetaceae	g__Treponema_2	s__unclassified_g__Treponema_2	OTU647	ErHL_0	2.56184	0.0251105
p__Spirochaetae	c__Spirochaetes	o__Spirochaetales	f__Spirochaetaceae	g__Treponema_2	s__unclassified_g__Treponema_2	OTU687	ErHL_0	2.35623	0.025843
p__Verrucomicrobia	c__WCHB1-41	o__norank_c__WCHB1-41	f__norank_c__WCHB1-41	g__norank_c__WCHB1-41	s__uncultured_bacterium_g__norank_c__WCHB1-41	OTU694	ErHL_0	2.41802	0.0345016
p__Bacteroidetes	c__Bacteroidia	o__Bacteroidales	f__Prevotellaceae	g__norank_f__Prevotellaceae	s__uncultured_bacterium_g__norank_f__Prevotellaceae	OTU75	ErHL_0	2.44706	0.0185723
p__Firmicutes	c__Clostridia	o__Clostridiales	f__Lachnospiraceae	g__unclassified_f__Lachnospiraceae	s__unclassified_f__Lachnospiraceae	OTU842	ErHL_0	2.37744	0.0123222
p__Firmicutes	c__Clostridia	o__Clostridiales	f__Ruminococcaceae	g__Ruminococcus_1	s__unclassified_g__Ruminococcus_1	OTU95	ErHL_0	2.73199	0.0440277
p__Firmicutes	c__Clostridia	o__Clostridiales	f__Christensenellaceae	g__Christensenellaceae_R-7_group	s__uncultured_prokaryote_g__Christensenellaceae_R-7_group	OTU99	ErHL_0	2.68744	0.0158245
p__Spirochaetae	c__Spirochaetes	o__Spirochaetales	f__Spirochaetaceae	g__Treponema_2	s__unclassified_g__Treponema_2	OTU993	ErHL_0	3.41443	0.0274969
p__Firmicutes	c__Clostridia	o__Clostridiales	f__Ruminococcaceae	g__Ruminococcaceae_UCG-010	s__uncultured_bacterium_g__Ruminococcaceae_UCG-010	OTU1018	LLW_0	2.41355	0.0476164
p__Actinobacteria	c__Actinobacteria	o__Coriobacteriales	f__Coriobacteriaceae	g__unclassified_f__Coriobacteriaceae	s__unclassified_f__Coriobacteriaceae	OTU1043	LLW_0	2.07546	0.0287286
p__Proteobacteria	c__Gammaproteobacteria	o__Pseudomonadales	f__Moraxellaceae	g__Acinetobacter	s__unclassified_g__Acinetobacter	OTU1048	LLW_0	2.20077	0.0345016
p__Firmicutes	c__Clostridia	o__Clostridiales	f__Ruminococcaceae	g__unclassified_f__Ruminococcaceae	s__unclassified_f__Ruminococcaceae	OTU1076	LLW_0	2.03158	0.0495522
p__Firmicutes	c__Clostridia	o__Clostridiales	f__Family_XIII	g__Family_XIII_AD3011_group	s__unclassified_g__Family_XIII_AD3011_group	OTU1141	LLW_0	3.06679	0.0497871
p__Bacteroidetes	c__Bacteroidia	o__Bacteroidales	f__Prevotellaceae	g__Prevotella_7	s__unclassified_g__Prevotella_7	OTU1182	LLW_0	2.92644	0.0199128
p__Bacteroidetes	c__Bacteroidia	o__Bacteroidales	f__Rikenellaceae	g__Rikenellaceae_RC9_gut_group	s__uncultured_bacterium_g__Rikenellaceae_RC9_gut_group	OTU1187	LLW_0	2.91735	0.0053978
p__Proteobacteria	c__Epsilonproteobacteria	o__Campylobacterales	f__Helicobacteraceae	g__Helicobacter	s__unclassified_g__Helicobacter	OTU1199	LLW_0	3.08384	0.00310684
p__Actinobacteria	c__Actinobacteria	o__Coriobacteriales	f__Coriobacteriaceae	g__Slackia	s__Slackia_isoflavoniconvertens	OTU1202	LLW_0	2.14315	0.0117828
p__Firmicutes	c__Clostridia	o__Clostridiales	f__Ruminococcaceae	g__Candidatus_Soleaferrea	s__uncultured_bacterium_g__Candidatus_Soleaferrea	OTU1233	LLW_0	2.42326	0.00683641
p__Firmicutes	c__Clostridia	o__Clostridiales	f__Ruminococcaceae	g__Anaerotruncus	s__uncultured_organism_g__Anaerotruncus	OTU1254	LLW_0	2.32459	0.00324299
p__Spirochaetae	c__Spirochaetes	o__Spirochaetales	f__Spirochaetaceae	g__Treponema_2	s__Treponema_succinifaciens_DSM_2489	OTU1287	LLW_0	3.44493	0.0269735
p__Firmicutes	c__Clostridia	o__Clostridiales	f__Ruminococcaceae	g__Ruminococcaceae_UCG-002	s__unclassified_g__Ruminococcaceae_UCG-002	OTU1295	LLW_0	2.22844	0.0153434
p__Firmicutes	c__Erysipelotrichia	o__Erysipelotrichales	f__Erysipelotrichaceae	g__Asteroleplasma	s__unclassified_g__Asteroleplasma	OTU1296	LLW_0	2.31008	0.00439779
p__Bacteroidetes	c__Bacteroidia	o__Bacteroidales	f__Prevotellaceae	g__unclassified_f__Prevotellaceae	s__unclassified_f__Prevotellaceae	OTU1341	LLW_0	2.11111	0.0140708
p__Proteobacteria	c__Epsilonproteobacteria	o__Campylobacterales	f__Helicobacteraceae	g__Helicobacter	s__unclassified_g__Helicobacter	OTU175	LLW_0	2.35875	0.0402018
p__Firmicutes	c__Clostridia	o__Clostridiales	f__Ruminococcaceae	g__Ruminiclostridium_9	s__uncultured_organism_g__Ruminiclostridium_9	OTU264	LLW_0	2.07252	0.046858
p__Firmicutes	c__Clostridia	o__Clostridiales	f__Ruminococcaceae	g__Ruminococcaceae_UCG-005	s__unclassified_g__Ruminococcaceae_UCG-005	OTU280	LLW_0	3.80923	0.014752
p__Firmicutes	c__Clostridia	o__Clostridiales	f__Lachnospiraceae	g__[Bacteroides]_pectinophilus_group	s__uncultured_bacterium_g__[Bacteroides]_pectinophilus_group	OTU334	LLW_0	2.18444	0.00844574
p__Firmicutes	c__Erysipelotrichia	o__Erysipelotrichales	f__Erysipelotrichaceae	g__Erysipelotrichaceae_UCG-003	s__uncultured_bacterium_g__Erysipelotrichaceae_UCG-003	OTU367	LLW_0	2.35544	0.0139946
p__Firmicutes	c__Clostridia	o__Clostridiales	f__Ruminococcaceae	g__Ruminococcaceae_UCG-014	s__uncultured_bacterium_g__Ruminococcaceae_UCG-014	OTU390	LLW_0	2.7546	0.0387176
p__Spirochaetae	c__Spirochaetes	o__Spirochaetales	f__Spirochaetaceae	g__Treponema_2	s__unclassified_g__Treponema_2	OTU42	LLW_0	3.0793	0.016848
p__Firmicutes	c__Erysipelotrichia	o__Erysipelotrichales	f__Erysipelotrichaceae	g__norank_f__Erysipelotrichaceae	s__unclassified_g__norank_f__Erysipelotrichaceae	OTU420	LLW_0	2.17177	0.019859
p__Firmicutes	c__Clostridia	o__Clostridiales	f__Lachnospiraceae	g__unclassified_f__Lachnospiraceae	s__unclassified_f__Lachnospiraceae	OTU432	LLW_0	2.04399	0.0147825
p__Firmicutes	c__Clostridia	o__Clostridiales	f__Ruminococcaceae	g__Ruminococcus_1	s__unclassified_g__Ruminococcus_1	OTU449	LLW_0	2.3188	0.0449973
p__Firmicutes	c__Clostridia	o__Clostridiales	f__Ruminococcaceae	g__Faecalibacterium	s__unclassified_g__Faecalibacterium	OTU452	LLW_0	3.50335	0.0209525
p__Firmicutes	c__Clostridia	o__Clostridiales	f__Lachnospiraceae	g__Lachnospiraceae_AC2044_group	s__uncultured_bacterium_g__Lachnospiraceae_AC2044_group	OTU510	LLW_0	2.99975	0.0474316
p__Firmicutes	c__Clostridia	o__Clostridiales	f__Ruminococcaceae	g__Anaerotruncus	s__unclassified_g__Anaerotruncus	OTU528	LLW_0	2.07839	0.0304634
p__Firmicutes	c__Clostridia	o__Clostridiales	f__Lachnospiraceae	g__[Eubacterium]_eligens_group	s__uncultured_bacterium_g__[Eubacterium]_eligens_group	OTU543	LLW_0	2.45781	0.028733
p__Firmicutes	c__Clostridia	o__Clostridiales	f__Clostridiales_vadinBB60_group	g__norank_f__Clostridiales_vadinBB60_group	s__uncultured_rumen_bacterium_g__norank_f__Clostridiales_vadinBB60_group	OTU594	LLW_0	2.23683	0.0216911
p__Firmicutes	c__Clostridia	o__Clostridiales	f__Peptococcaceae	g__Peptococcus	s__uncultured_bacterium_g__Peptococcus	OTU597	LLW_0	2.5644	0.0142405
p__Firmicutes	c__Clostridia	o__Clostridiales	f__Ruminococcaceae	g__Ruminococcaceae_UCG-010	s__unclassified_g__Ruminococcaceae_UCG-010	OTU598	LLW_0	2.56606	0.0345016
p__Firmicutes	c__Clostridia	o__Clostridiales	f__Ruminococcaceae	g__Ruminococcaceae_UCG-014	s__unclassified_g__Ruminococcaceae_UCG-014	OTU599	LLW_0	2.25051	0.0191849
p__Firmicutes	c__Clostridia	o__Clostridiales	f__Ruminococcaceae	g__Ruminococcaceae_UCG-014	s__uncultured_bacterium_g__Ruminococcaceae_UCG-014	OTU601	LLW_0	2.34801	0.0436691
p__Spirochaetae	c__Spirochaetes	o__Spirochaetales	f__Spirochaetaceae	g__Treponema_2	s__Treponema_berlinense	OTU603	LLW_0	2.72337	0.00582729
p__Proteobacteria	c__Deltaproteobacteria	o__Desulfovibrionales	f__Desulfovibrionaceae	g__Desulfovibrio	s__gut_metagenome_g__Desulfovibrio	OTU607	LLW_0	2.61925	0.0474085
p__Firmicutes	c__Negativicutes	o__Selenomonadales	f__Veillonellaceae	g__unclassified_f__Veillonellaceae	s__unclassified_f__Veillonellaceae	OTU616	LLW_0	3.24196	0.00540847
p__Spirochaetae	c__Spirochaetes	o__Spirochaetales	f__Spirochaetaceae	g__Treponema_2	s__unclassified_g__Treponema_2	OTU620	LLW_0	3.28045	0.0114863
p__Firmicutes	c__Erysipelotrichia	o__Erysipelotrichales	f__Erysipelotrichaceae	g__Erysipelotrichaceae_UCG-004	s__uncultured_bacterium_g__Erysipelotrichaceae_UCG-004	OTU641	LLW_0	2.60709	0.0137523
p__Spirochaetae	c__Spirochaetes	o__Spirochaetales	f__Spirochaetaceae	g__Treponema_2	s__Treponema_porcinum	OTU648	LLW_0	3.31417	0.00432024
p__Firmicutes	c__Clostridia	o__Clostridiales	f__Peptococcaceae	g__Peptococcus	s__uncultured_bacterium_g__Peptococcus	OTU657	LLW_0	3.23874	0.0115394
p__Cyanobacteria	c__Cyanobacteria	o__Gastranaerophilales	f__norank_o__Gastranaerophilales	g__norank_o__Gastranaerophilales	s__unclassified_g__norank_o__Gastranaerophilales	OTU669	LLW_0	2.38005	0.0345016
p__Spirochaetae	c__Spirochaetes	o__Spirochaetales	f__Spirochaetaceae	g__Sphaerochaeta	s__uncultured_bacterium_g__Sphaerochaeta	OTU684	LLW_0	3.10528	0.0241096
p__Firmicutes	c__Clostridia	o__Clostridiales	f__Ruminococcaceae	g__Ruminococcus_1	s__Ruminococcus_flavefaciens	OTU712	LLW_0	2.50106	0.0408081
p__Firmicutes	c__Clostridia	o__Clostridiales	f__Ruminococcaceae	g__Ruminococcaceae_UCG-002	s__uncultured_bacterium_g__Ruminococcaceae_UCG-002	OTU716	LLW_0	3.08962	0.0294131
p__Firmicutes	c__Clostridia	o__Clostridiales	f__Lachnospiraceae	g__unclassified_f__Lachnospiraceae	s__unclassified_f__Lachnospiraceae	OTU717	LLW_0	2.80456	0.0454882
p__Firmicutes	c__Erysipelotrichia	o__Erysipelotrichales	f__Erysipelotrichaceae	g__Erysipelotrichaceae_UCG-004	s__unidentified_rumen_bacterium_RFN74	OTU723	LLW_0	2.15933	0.000314533
p__Firmicutes	c__Clostridia	o__Clostridiales	f__Ruminococcaceae	g__Ruminococcaceae_UCG-010	s__uncultured_bacterium_g__Ruminococcaceae_UCG-010	OTU732	LLW_0	2.22643	0.037782
p__Firmicutes	c__Clostridia	o__Clostridiales	f__Ruminococcaceae	g__Ruminococcaceae_UCG-010	s__unclassified_g__Ruminococcaceae_UCG-010	OTU759	LLW_0	2.31066	0.00203651
p__Firmicutes	c__Clostridia	o__Clostridiales	f__Ruminococcaceae	g__Ruminococcaceae_UCG-014	s__unclassified_g__Ruminococcaceae_UCG-014	OTU764	LLW_0	2.34063	0.039539
p__Firmicutes	c__Erysipelotrichia	o__Erysipelotrichales	f__Erysipelotrichaceae	g__Erysipelotrichaceae_UCG-004	s__unclassified_g__Erysipelotrichaceae_UCG-004	OTU782	LLW_0	2.33597	0.0306601
p__Firmicutes	c__Erysipelotrichia	o__Erysipelotrichales	f__Erysipelotrichaceae	g__Asteroleplasma	s__uncultured_bacterium_g__Asteroleplasma	OTU810	LLW_0	2.19201	0.0016672
p__Bacteroidetes	c__Bacteroidia	o__Bacteroidales	f__Bacteroidales_S24-7_group	g__norank_f__Bacteroidales_S24-7_group	s__uncultured_Porphyromonadaceae_bacterium_g__norank_f__Bacteroidales_S24-7_group	OTU821	LLW_0	3.24454	0.0163896
p__Firmicutes	c__Clostridia	o__Clostridiales	f__Ruminococcaceae	g__Butyricicoccus	s__unclassified_g__Butyricicoccus	OTU824	LLW_0	3.39116	0.0121222
p__Bacteroidetes	c__Bacteroidia	o__Bacteroidales	f__Prevotellaceae	g__unclassified_f__Prevotellaceae	s__unclassified_f__Prevotellaceae	OTU834	LLW_0	2.77403	0.00711339
p__Firmicutes	c__Clostridia	o__Clostridiales	f__Lachnospiraceae	g__Lachnospiraceae_NK4A136_group	s__unclassified_g__Lachnospiraceae_NK4A136_group	OTU843	LLW_0	2.41974	0.035466
p__Firmicutes	c__Clostridia	o__Clostridiales	f__Lachnospiraceae	g__[Eubacterium]_ruminantium_group	s__uncultured_bacterium_g__[Eubacterium]_ruminantium_group	OTU844	LLW_0	2.45704	0.0164376
p__Firmicutes	c__Clostridia	o__Clostridiales	f__Ruminococcaceae	g__Ruminococcaceae_UCG-005	s__unclassified_g__Ruminococcaceae_UCG-005	OTU856	LLW_0	3.6719	0.0394028
p__Firmicutes	c__Clostridia	o__Clostridiales	f__Ruminococcaceae	g__Ruminococcaceae_UCG-014	s__unidentified_rumen_bacterium_JW32	OTU859	LLW_0	2.34492	0.0488651
p__Firmicutes	c__Erysipelotrichia	o__Erysipelotrichales	f__Erysipelotrichaceae	g__Asteroleplasma	s__uncultured_bacterium_g__Asteroleplasma	OTU903	LLW_0	2.68845	0.00249295
p__Actinobacteria	c__Actinobacteria	o__Coriobacteriales	f__Coriobacteriaceae	g__norank_f__Coriobacteriaceae	s__uncultured_bacterium_g__norank_f__Coriobacteriaceae	OTU908	LLW_0	2.13161	0.0419577
p__Firmicutes	c__Clostridia	o__Clostridiales	f__Ruminococcaceae	g__Ruminococcaceae_UCG-010	s__uncultured_bacterium_g__Ruminococcaceae_UCG-010	OTU911	LLW_0	2.05597	0.0345016
p__Firmicutes	c__Clostridia	o__Clostridiales	f__Family_XIII	g__Family_XIII_UCG-001	s__uncultured_bacterium_g__Family_XIII_UCG-001	OTU914	LLW_0	2.50701	0.0337042
p__Firmicutes	c__Clostridia	o__Clostridiales	f__Lachnospiraceae	g__Lachnospiraceae_NK3A20_group	s__unclassified_g__Lachnospiraceae_NK3A20_group	OTU931	LLW_0	2.20829	0.00294429
p__Firmicutes	c__Clostridia	o__Clostridiales	f__Lachnospiraceae	g__Oribacterium	s__uncultured_bacterium_g__Oribacterium	OTU941	LLW_0	2.67185	0.0363054
p__Firmicutes	c__Clostridia	o__Clostridiales	f__Clostridiales_vadinBB60_group	g__norank_f__Clostridiales_vadinBB60_group	s__uncultured_bacterium_g__norank_f__Clostridiales_vadinBB60_group	OTU981	LLW_0	2.20853	0.0345016
p__Firmicutes	c__Clostridia	o__Clostridiales	f__Ruminococcaceae	g__[Eubacterium]_coprostanoligenes_group	s__uncultured_bacterium_g__[Eubacterium]_coprostanoligenes_group	OTU984	LLW_0	2.40241	0.0114481
p__Firmicutes	c__Negativicutes	o__Selenomonadales	f__Veillonellaceae	g__Megamonas	s__unclassified_g__Megamonas	OTU1049	SLW_0	3.38209	0.0105728
p__Firmicutes	c__Clostridia	o__Clostridiales	f__Ruminococcaceae	g__unclassified_f__Ruminococcaceae	s__unclassified_f__Ruminococcaceae	OTU1058	SLW_0	2.25271	0.013083
p__Firmicutes	c__Clostridia	o__Clostridiales	f__Lachnospiraceae	g__Lachnospiraceae_FCS020_group	s__uncultured_bacterium_g__Lachnospiraceae_FCS020_group	OTU107	SLW_0	2.18892	0.0398022
p__Actinobacteria	c__Actinobacteria	o__Micrococcales	f__Intrasporangiaceae	g__unclassified_f__Intrasporangiaceae	s__unclassified_f__Intrasporangiaceae	OTU1084	SLW_0	2.66029	0.0345016
p__Synergistetes	c__Synergistia	o__Synergistales	f__Synergistaceae	g__Cloacibacillus	s__uncultured_organism_g__Cloacibacillus	OTU1109	SLW_0	2.47103	0.0345016
p__Actinobacteria	c__Actinobacteria	o__Coriobacteriales	f__Coriobacteriaceae	g__norank_f__Coriobacteriaceae	s__uncultured_bacterium_g__norank_f__Coriobacteriaceae	OTU1135	SLW_0	2.19835	0.0408081
p__Bacteroidetes	c__Bacteroidia	o__Bacteroidales	f__Prevotellaceae	g__Prevotella_9	s__unclassified_g__Prevotella_9	OTU1138	SLW_0	3.24474	0.0075541
p__Firmicutes	c__Clostridia	o__Clostridiales	f__Ruminococcaceae	g__Ruminococcaceae_UCG-008	s__uncultured_bacterium_g__Ruminococcaceae_UCG-008	OTU1139	SLW_0	3.71	0.0199948
p__Bacteroidetes	c__Bacteroidia	o__Bacteroidales	f__norank_o__Bacteroidales	g__norank_o__Bacteroidales	s__uncultured_bacterium_g__norank_o__Bacteroidales	OTU1144	SLW_0	2.02556	0.00925859
p__Actinobacteria	c__Actinobacteria	o__Micrococcales	f__Micrococcaceae	g__Arthrobacter	s__unclassified_g__Arthrobacter	OTU1145	SLW_0	2.49813	0.0345016
p__Firmicutes	c__Erysipelotrichia	o__Erysipelotrichales	f__Erysipelotrichaceae	g__Catenibacterium	s__uncultured_bacterium_g__Catenibacterium	OTU1158	SLW_0	2.86973	0.0267858
p__Bacteroidetes	c__Bacteroidia	o__Bacteroidales	f__Bacteroidales_S24-7_group	g__norank_f__Bacteroidales_S24-7_group	s__uncultured_bacterium_g__norank_f__Bacteroidales_S24-7_group	OTU1163	SLW_0	2.14046	0.015827
p__Bacteroidetes	c__Bacteroidia	o__Bacteroidales	f__Prevotellaceae	g__norank_f__Prevotellaceae	s__uncultured_bacterium_g__norank_f__Prevotellaceae	OTU1188	SLW_0	2.97268	0.0118969
p__Proteobacteria	c__Epsilonproteobacteria	o__Campylobacterales	f__Campylobacteraceae	g__Campylobacter	s__Campylobacter_hyointestinalis_subsp__lawsonii	OTU1195	SLW_0	4.39921	0.0106323
p__Firmicutes	c__Clostridia	o__Clostridiales	f__Ruminococcaceae	g__Ruminococcus_1	s__Ruminococcus_bicirculans	OTU1197	SLW_0	2.13759	0.0319959
p__Firmicutes	c__Negativicutes	o__Selenomonadales	f__Veillonellaceae	g__Megasphaera	s__unclassified_g__Megasphaera	OTU1200	SLW_0	3.0601	0.00266008
p__Tenericutes	c__Mollicutes	o__Mollicutes_RF9	f__norank_o__Mollicutes_RF9	g__norank_o__Mollicutes_RF9	s__unclassified_g__norank_o__Mollicutes_RF9	OTU1201	SLW_0	2.26382	0.0296873
p__Proteobacteria	c__Gammaproteobacteria	o__Aeromonadales	f__Succinivibrionaceae	g__Succinivibrio	s__unclassified_g__Succinivibrio	OTU1205	SLW_0	3.17812	0.0130424
p__Actinobacteria	c__Actinobacteria	o__Coriobacteriales	f__Coriobacteriaceae	g__Olsenella	s__unclassified_g__Olsenella	OTU1206	SLW_0	2.84641	0.0106323
p__Actinobacteria	c__Actinobacteria	o__Coriobacteriales	f__Coriobacteriaceae	g__Enterorhabdus	s__uncultured_bacterium_g__Enterorhabdus	OTU1207	SLW_0	2.12013	0.0122716
p__Proteobacteria	c__Gammaproteobacteria	o__Aeromonadales	f__Succinivibrionaceae	g__Succinivibrio	s__uncultured_bacterium_g__Succinivibrio	OTU1209	SLW_0	3.04547	0.0321097
p__Firmicutes	c__Clostridia	o__Clostridiales	f__Family_XIII	g__Mogibacterium	s__unclassified_g__Mogibacterium	OTU1211	SLW_0	2.26758	0.0489212
p__Firmicutes	c__Erysipelotrichia	o__Erysipelotrichales	f__Erysipelotrichaceae	g__Solobacterium	s__uncultured_bacterium_g__Solobacterium	OTU1222	SLW_0	3.37515	0.00751833
p__Proteobacteria	c__Gammaproteobacteria	o__Aeromonadales	f__Succinivibrionaceae	g__Succinivibrio	s__uncultured_bacterium_g__Succinivibrio	OTU1226	SLW_0	2.22044	0.00636737
p__Firmicutes	c__Bacilli	o__Lactobacillales	f__Lactobacillaceae	g__Lactobacillus	s__unclassified_g__Lactobacillus	OTU1245	SLW_0	2.7882	0.0178552
p__Proteobacteria	c__Epsilonproteobacteria	o__Campylobacterales	f__Campylobacteraceae	g__Campylobacter	s__Campylobacter_jejuni_subsp__jejuni	OTU1252	SLW_0	2.66191	0.00695679
p__Bacteroidetes	c__Bacteroidia	o__Bacteroidales	f__Prevotellaceae	g__Prevotella_7	s__unclassified_g__Prevotella_7	OTU1268	SLW_0	3.04251	0.0195389
p__Firmicutes	c__Bacilli	o__Lactobacillales	f__Lactobacillaceae	g__Lactobacillus	s__Lactobacillus_salivarius	OTU1294	SLW_0	2.34432	0.00431468
p__Bacteroidetes	c__Bacteroidia	o__Bacteroidales	f__Prevotellaceae	g__Alloprevotella	s__unclassified_g__Alloprevotella	OTU1297	SLW_0	2.68775	0.0133001
p__Firmicutes	c__Bacilli	o__Lactobacillales	f__Lactobacillaceae	g__Lactobacillus	s__Lactobacillus_ruminis	OTU1312	SLW_0	2.12361	0.0287286
p__Firmicutes	c__Clostridia	o__Clostridiales	f__Lachnospiraceae	g__Blautia	s__uncultured_bacterium_g__Blautia	OTU1335	SLW_0	2.44723	0.0150293
p__Bacteroidetes	c__Bacteroidia	o__Bacteroidales	f__Prevotellaceae	g__Prevotella_9	s__uncultured_bacterium_g__Prevotella_9	OTU1345	SLW_0	3.98086	0.0163896
p__Firmicutes	c__Bacilli	o__Lactobacillales	f__Lactobacillaceae	g__Lactobacillus	s__unclassified_g__Lactobacillus	OTU1358	SLW_0	2.29389	0.00179578
p__Firmicutes	c__Negativicutes	o__Selenomonadales	f__Veillonellaceae	g__Megasphaera	s__Megasphaera_elsdenii_DSM_20460	OTU1363	SLW_0	3.9026	0.00283328
p__Proteobacteria	c__Epsilonproteobacteria	o__Campylobacterales	f__Helicobacteraceae	g__Helicobacter	s__unclassified_g__Helicobacter	OTU186	SLW_0	3.82969	0.00628132
p__Firmicutes	c__Clostridia	o__Clostridiales	f__Lachnospiraceae	g__[Eubacterium]_ruminantium_group	s__unclassified_g__[Eubacterium]_ruminantium_group	OTU36	SLW_0	2.15248	0.0403354
p__Firmicutes	c__Clostridia	o__Clostridiales	f__Ruminococcaceae	g__Subdoligranulum	s__uncultured_bacterium_g__Subdoligranulum	OTU374	SLW_0	3.85238	0.0178922
p__Firmicutes	c__Erysipelotrichia	o__Erysipelotrichales	f__Erysipelotrichaceae	g__Erysipelotrichaceae_UCG-006	s__uncultured_bacterium_g__Erysipelotrichaceae_UCG-006	OTU385	SLW_0	2.20384	0.00683641
p__Firmicutes	c__Clostridia	o__Clostridiales	f__Ruminococcaceae	g__Ruminococcaceae_UCG-014	s__unclassified_g__Ruminococcaceae_UCG-014	OTU394	SLW_0	3.03527	0.0294131
p__Bacteroidetes	c__Bacteroidia	o__Bacteroidales	f__Prevotellaceae	g__Prevotella_9	s__uncultured_bacterium_g__Prevotella_9	OTU407	SLW_0	3.7958	0.0445514
p__Bacteroidetes	c__Bacteroidia	o__Bacteroidales	f__Prevotellaceae	g__Prevotella_9	s__uncultured_bacterium_g__Prevotella_9	OTU408	SLW_0	4.19103	0.0321097
p__Bacteroidetes	c__Bacteroidia	o__Bacteroidales	f__Prevotellaceae	g__unclassified_f__Prevotellaceae	s__unclassified_f__Prevotellaceae	OTU411	SLW_0	2.73597	0.0172682
p__Firmicutes	c__Clostridia	o__Clostridiales	f__Ruminococcaceae	g__Ruminococcaceae_UCG-014	s__uncultured_Ruminococcaceae_bacterium_g__Ruminococcaceae_UCG-014	OTU579	SLW_0	2.73154	0.046413
p__Firmicutes	c__Negativicutes	o__Selenomonadales	f__Veillonellaceae	g__norank_f__Veillonellaceae	s__Veillonellaceae_bacterium_DJF_CR19	OTU623	SLW_0	3.27025	0.0101948
p__Firmicutes	c__Negativicutes	o__Selenomonadales	f__Veillonellaceae	g__Dialister	s__uncultured_bacterium_g__Dialister	OTU631	SLW_0	3.44212	0.023388
p__Chlamydiae	c__Chlamydiae	o__Chlamydiales	f__Chlamydiaceae	g__Chlamydia	s__Chlamydia_suis	OTU637	SLW_0	2.73855	0.0374822
p__Firmicutes	c__Negativicutes	o__Selenomonadales	f__Veillonellaceae	g__Veillonella	s__Veillonella_caviae	OTU661	SLW_0	2.38319	0.0130037
p__Cyanobacteria	c__Cyanobacteria	o__Gastranaerophilales	f__norank_o__Gastranaerophilales	g__norank_o__Gastranaerophilales	s__uncultured_bacterium_g__norank_o__Gastranaerophilales	OTU788	SLW_0	2.10408	0.0462836
p__Firmicutes	c__Negativicutes	o__Selenomonadales	f__Acidaminococcaceae	g__Acidaminococcus	s__Acidaminococcus_fermentans_DSM_20731	OTU789	SLW_0	2.29514	0.0448756
p__Bacteroidetes	c__Bacteroidia	o__Bacteroidales	f__Prevotellaceae	g__Alloprevotella	s__uncultured_organism_g__Alloprevotella	OTU814	SLW_0	3.18162	0.00373825
p__Firmicutes	c__Negativicutes	o__Selenomonadales	f__Veillonellaceae	g__Anaerovibrio	s__uncultured_bacterium_g__Anaerovibrio	OTU823	SLW_0	3.93306	0.046959
p__Bacteroidetes	c__Bacteroidia	o__Bacteroidales	f__Prevotellaceae	g__Prevotella_7	s__uncultured_bacterium_g__Prevotella_7	OTU832	SLW_0	2.64864	0.00348092
p__Firmicutes	c__Bacilli	o__Lactobacillales	f__Lactobacillaceae	g__Lactobacillus	s__unclassified_g__Lactobacillus	OTU835	SLW_0	4.38283	0.00697856
p__Firmicutes	c__Clostridia	o__Clostridiales	f__Lachnospiraceae	g__Roseburia	s__uncultured_Lachnospiraceae_bacterium_g__Roseburia	OTU846	SLW_0	3.49109	0.0239449
p__Firmicutes	c__Clostridia	o__Clostridiales	f__Ruminococcaceae	g__Subdoligranulum	s__unclassified_g__Subdoligranulum	OTU887	SLW_0	2.83793	0.0297817
p__Firmicutes	c__Clostridia	o__Clostridiales	f__Ruminococcaceae	g__Ruminococcus_1	s__unclassified_g__Ruminococcus_1	OTU890	SLW_0	2.48169	0.0458261
p__Bacteroidetes	c__Bacteroidia	o__Bacteroidales	f__Prevotellaceae	g__Prevotellaceae_NK3B31_group	s__human_gut_metagenome_g__Prevotellaceae_NK3B31_group	OTU891	SLW_0	2.1435	0.0191849
p__Firmicutes	c__Clostridia	o__Clostridiales	f__Lachnospiraceae	g__Blautia	s__unclassified_g__Blautia	OTU912	SLW_0	2.85861	0.0267858
p__Firmicutes	c__Clostridia	o__Clostridiales	f__Lachnospiraceae	g__Dorea	s__Dorea_formicigenerans_ATCC_27755	OTU929	SLW_0	3.37484	0.0024643
p__Actinobacteria	c__Actinobacteria	o__Coriobacteriales	f__Coriobacteriaceae	g__Collinsella	s__unclassified_g__Collinsella	OTU938	SLW_0	2.02475	0.0308703
p__Firmicutes	c__Clostridia	o__Clostridiales	f__Lachnospiraceae	g__Lachnospiraceae_UCG-002	s__unclassified_g__Lachnospiraceae_UCG-002	OTU948	SLW_0	2.36252	0.0393492
p__Bacteroidetes	c__Bacteroidia	o__Bacteroidales	f__Prevotellaceae	g__norank_f__Prevotellaceae	s__uncultured_bacterium_g__norank_f__Prevotellaceae	OTU949	SLW_0	3.62299	0.015301
p__Firmicutes	c__Bacilli	o__Lactobacillales	f__Lactobacillaceae	g__Lactobacillus	s__Lactobacillus_johnsonii	OTU959	SLW_0	4.65573	0.0232783
p__Firmicutes	c__Clostridia	o__Clostridiales	f__Lachnospiraceae	g__[Eubacterium]_hallii_group	s__unclassified_g__[Eubacterium]_hallii_group	OTU971	SLW_0	2.15755	0.0142405
p__Firmicutes	c__Negativicutes	o__Selenomonadales	f__Veillonellaceae	g__Megasphaera	s__uncultured_bacterium_g__Megasphaera	OTU979	SLW_0	2.31639	0.00854298
p__Tenericutes	c__Mollicutes	o__Mollicutes_RF9	f__norank_o__Mollicutes_RF9	g__norank_o__Mollicutes_RF9	s__uncultured_bacterium_g__norank_o__Mollicutes_RF9	OTU997	SLW_0	2.26725	0.0187137
ErHL_0 = the cecal samples of Erhualian fattening barrows fed with basal diet; LLW_0 = the cecal samples of large Large White pigs fed with basal diet; SLW_0 = the cecal samples of small Large White fattening barrows fed with basal diet;

## Sheet: Table S3
Effects of varying levels of wheat bran dietary fiber on growth performance, fiber digestibility and gut microbiota in Erhualian and Large White pigs
Taoran Du, Pinghua Li , Qing Niu, Guang Pu, Binbin Wang, Gensheng Liu, Pinghui Li, Peipei Niu, Zongping Zhang, Chengwu Wu, Liming Hou, M.S. Hedemanne and Ruihua Huang*
* Correspondence: Ruihua Huang: rhhuang@njau.edu.cn
Table S3 Linear discriminant analysis (LDA) effect size (LEfSe) of cecum microbiota among ErHL-7, LLW-7 and SLW-7
Phylum	Class	Order	Family	Genus	Species	OTU	Enrichment group	LDA-value	P-value
p__Cyanobacteria							LLW_7	2.91018	0.036447
p__Tenericutes							LLW_7	3.34658	0.00458042
p__Proteobacteria	c__Alphaproteobacteria						ErHL_7	2.47419	0.00552302
p__Cyanobacteria	c__Cyanobacteria						LLW_7	2.91018	0.036447
p__Tenericutes	c__Mollicutes						LLW_7	3.34658	0.00458042
p__Tenericutes	c__Mollicutes	o__Anaeroplasmatales					ErHL_7	2.53951	0.0128901
p__Tenericutes	c__Mollicutes	o__NB1-n					ErHL_7	2.10046	0.0191849
p__Actinobacteria	c__Actinobacteria	o__Corynebacteriales					LLW_7	3.29816	0.00572025
p__Cyanobacteria	c__Cyanobacteria	o__Gastranaerophilales					LLW_7	2.91001	0.036447
p__Tenericutes	c__Mollicutes	o__Mollicutes_RF9					LLW_7	3.30512	0.00841468
p__Proteobacteria	c__Betaproteobacteria	o__Neisseriales					LLW_7	4.2369	0.023188
p__Proteobacteria	c__Gammaproteobacteria	o__Pasteurellales					LLW_7	3.03608	0.00751833
p__Tenericutes	c__Mollicutes	o__Anaeroplasmatales	f__Anaeroplasmataceae				ErHL_7	2.53951	0.0128901
p__Bacteroidetes	c__Bacteroidia	o__Bacteroidales	f__Bacteroidales_RF16_group				ErHL_7	3.43605	0.046959
p__Firmicutes	c__Clostridia	o__Clostridiales	f__Clostridiales_vadinBB60_group				ErHL_7	2.98865	0.00681722
p__Tenericutes	c__Mollicutes	o__NB1-n	f__norank_o__NB1-n				ErHL_7	2.10066	0.0191849
p__Bacteroidetes	c__Bacteroidia	o__Bacteroidales	f__unclassified_o__Bacteroidales				ErHL_7	3.04703	0.0179971
p__Bacteroidetes	c__Bacteroidia	o__Bacteroidales	f__Porphyromonadaceae				ErHL_7	3.85021	0.033845
p__Bacteroidetes	c__Bacteroidia	o__Bacteroidales	f__Rikenellaceae				ErHL_7	3.97473	0.0254125
p__Firmicutes	c__Clostridia	o__Clostridiales	f__Ruminococcaceae				ErHL_7	4.43676	0.0222143
p__Spirochaetae	c__Spirochaetes	o__Spirochaetales	f__Brachyspiraceae				LLW_7	2.46197	0.0166889
p__Actinobacteria	c__Actinobacteria	o__Corynebacteriales	f__Corynebacteriaceae				LLW_7	3.27868	0.00572025
p__Firmicutes	c__Clostridia	o__Clostridiales	f__Family_XIII				LLW_7	3.22195	0.00293687
p__Proteobacteria	c__Epsilonproteobacteria	o__Campylobacterales	f__Helicobacteraceae				LLW_7	3.78243	0.0115394
p__Proteobacteria	c__Betaproteobacteria	o__Neisseriales	f__Neisseriaceae				LLW_7	4.2369	0.023188
p__Cyanobacteria	c__Cyanobacteria	o__Gastranaerophilales	f__norank_o__Gastranaerophilales				LLW_7	2.91001	0.036447
p__Tenericutes	c__Mollicutes	o__Mollicutes_RF9	f__norank_o__Mollicutes_RF9				LLW_7	3.30512	0.00841468
p__Proteobacteria	c__Gammaproteobacteria	o__Pasteurellales	f__Pasteurellaceae				LLW_7	3.03597	0.00751833
p__Firmicutes	c__Negativicutes	o__Selenomonadales	f__Veillonellaceae				LLW_7	4.45912	0.0417758
p__Firmicutes	c__Clostridia	o__Clostridiales	f__Lachnospiraceae	g__[Bacteroides]_pectinophilus_group			ErHL_7	2.06836	0.0107415
p__Firmicutes	c__Clostridia	o__Clostridiales	f__Lachnospiraceae	g__[Eubacterium]_ruminantium_group			ErHL_7	2.51721	0.0128942
p__Tenericutes	c__Mollicutes	o__Anaeroplasmatales	f__Anaeroplasmataceae	g__Anaeroplasma			ErHL_7	2.53951	0.0128901
p__Bacteroidetes	c__Bacteroidia	o__Bacteroidales	f__Rikenellaceae	g__dgA-11_gut_group			ErHL_7	2.95968	0.034444
p__Firmicutes	c__Erysipelotrichia	o__Erysipelotrichales	f__Erysipelotrichaceae	g__Erysipelotrichaceae_UCG-004			ErHL_7	2.85943	0.0292416
p__Firmicutes	c__Clostridia	o__Clostridiales	f__Family_XIII	g__Family_XIII_AD3011_group			ErHL_7	2.8843	0.00270601
p__Bacteroidetes	c__Bacteroidia	o__Bacteroidales	f__Rikenellaceae	g__hoa5-07d05_gut_group			ErHL_7	2.43698	0.0345016
p__Firmicutes	c__Clostridia	o__Clostridiales	f__Lachnospiraceae	g__Howardella			ErHL_7	2.16407	0.0491054
p__Firmicutes	c__Clostridia	o__Clostridiales	f__Lachnospiraceae	g__Lachnoclostridium			ErHL_7	2.46605	0.0297591
p__Firmicutes	c__Clostridia	o__Clostridiales	f__Lachnospiraceae	g__Lachnospiraceae_NK4A136_group			ErHL_7	3.01178	0.00290273
p__Firmicutes	c__Clostridia	o__Clostridiales	f__Lachnospiraceae	g__Lachnospiraceae_UCG-003			ErHL_7	2.6374	0.00318818
p__Bacteroidetes	c__Bacteroidia	o__Bacteroidales	f__Bacteroidales_RF16_group	g__norank_f__Bacteroidales_RF16_group			ErHL_7	3.43605	0.046959
p__Firmicutes	c__Clostridia	o__Clostridiales	f__Clostridiales_vadinBB60_group	g__norank_f__Clostridiales_vadinBB60_group			ErHL_7	2.98865	0.00681722
p__Firmicutes	c__Erysipelotrichia	o__Erysipelotrichales	f__Erysipelotrichaceae	g__norank_f__Erysipelotrichaceae			ErHL_7	3.26095	0.00199647
p__Tenericutes	c__Mollicutes	o__NB1-n	f__norank_o__NB1-n	g__norank_o__NB1-n			ErHL_7	2.10001	0.0191849
p__Bacteroidetes	c__Bacteroidia	o__Bacteroidales	f__Porphyromonadaceae	g__Parabacteroides			ErHL_7	3.83176	0.0297591
p__Bacteroidetes	c__Bacteroidia	o__Bacteroidales	f__Prevotellaceae	g__Prevotella_1			ErHL_7	3.58031	0.0267858
p__Bacteroidetes	c__Bacteroidia	o__Bacteroidales	f__Rikenellaceae	g__Rikenellaceae_RC9_gut_group			ErHL_7	3.91682	0.0254125
p__Firmicutes	c__Clostridia	o__Clostridiales	f__Ruminococcaceae	g__Ruminiclostridium_6			ErHL_7	3.26113	0.00613609
p__Firmicutes	c__Clostridia	o__Clostridiales	f__Ruminococcaceae	g__Ruminococcaceae_NK4A214_group			ErHL_7	3.19244	0.0115394
p__Firmicutes	c__Clostridia	o__Clostridiales	f__Ruminococcaceae	g__Ruminococcaceae_UCG-002			ErHL_7	2.98853	0.0027539
p__Firmicutes	c__Clostridia	o__Clostridiales	f__Ruminococcaceae	g__Ruminococcaceae_UCG-005			ErHL_7	4.06245	0.033845
p__Firmicutes	c__Clostridia	o__Clostridiales	f__Ruminococcaceae	g__Ruminococcaceae_UCG-010			ErHL_7	3.29752	0.00748588
p__Firmicutes	c__Clostridia	o__Clostridiales	f__Ruminococcaceae	g__Ruminococcus_1			ErHL_7	3.57583	0.0131237
p__Firmicutes	c__Erysipelotrichia	o__Erysipelotrichales	f__Erysipelotrichaceae	g__unclassified_f__Erysipelotrichaceae			ErHL_7	2.06094	0.0181936
p__Bacteroidetes	c__Bacteroidia	o__Bacteroidales	f__unclassified_o__Bacteroidales	g__unclassified_o__Bacteroidales			ErHL_7	3.04703	0.0179971
p__Proteobacteria	c__Alphaproteobacteria	o__Rickettsiales	f__Rickettsiales_Incertae_Sedis	g__Candidatus_Hepatincola			ErHL_7	2.09825	0.0345016
p__Firmicutes	c__Erysipelotrichia	o__Erysipelotrichales	f__Erysipelotrichaceae	g__Candidatus_Stoquefichus			ErHL_7	2.80273	0.0345016
p__Firmicutes	c__Clostridia	o__Clostridiales	f__Lachnospiraceae	g__Cellulosilyticum			ErHL_7	2.06495	0.00854298
p__Firmicutes	c__Erysipelotrichia	o__Erysipelotrichales	f__Erysipelotrichaceae	g__Dielma			ErHL_7	2.23619	0.0345016
p__Firmicutes	c__Clostridia	o__Clostridiales	f__Ruminococcaceae	g__Hydrogenoanaerobacterium			ErHL_7	2.60264	0.0345016
p__Firmicutes	c__Clostridia	o__Clostridiales	f__Lachnospiraceae	g__Lachnoclostridium_10			ErHL_7	2.2553	0.0345016
p__Firmicutes	c__Clostridia	o__Clostridiales	f__Family_XIII	g__[Eubacterium]_brachy_group			LLW_7	2.75981	0.0185723
p__Firmicutes	c__Clostridia	o__Clostridiales	f__Lachnospiraceae	g__[Eubacterium]_xylanophilum_group			LLW_7	3.17238	0.0321097
p__Proteobacteria	c__Gammaproteobacteria	o__Pasteurellales	f__Pasteurellaceae	g__Actinobacillus			LLW_7	3.01622	0.00647575
p__Firmicutes	c__Clostridia	o__Clostridiales	f__Ruminococcaceae	g__Anaerotruncus			LLW_7	3.07238	0.00658216
p__Spirochaetae	c__Spirochaetes	o__Spirochaetales	f__Brachyspiraceae	g__Brachyspira			LLW_7	2.46195	0.0166889
p__Actinobacteria	c__Actinobacteria	o__Corynebacteriales	f__Corynebacteriaceae	g__Corynebacterium			LLW_7	2.40384	0.0390074
p__Actinobacteria	c__Actinobacteria	o__Corynebacteriales	f__Corynebacteriaceae	g__Corynebacterium_1			LLW_7	3.21713	0.00432024
p__Firmicutes	c__Negativicutes	o__Selenomonadales	f__Veillonellaceae	g__Dialister			LLW_7	3.34987	0.0104403
p__Proteobacteria	c__Epsilonproteobacteria	o__Campylobacterales	f__Helicobacteraceae	g__Helicobacter			LLW_7	3.78243	0.0115394
p__Firmicutes	c__Clostridia	o__Clostridiales	f__Lachnospiraceae	g__Lachnospira			LLW_7	3.10436	0.0165365
p__Firmicutes	c__Clostridia	o__Clostridiales	f__Lachnospiraceae	g__Lachnospiraceae_NK3A20_group			LLW_7	2.06772	0.0431843
p__Firmicutes	c__Clostridia	o__Clostridiales	f__Lachnospiraceae	g__Lachnospiraceae_UCG-001			LLW_7	2.58423	0.0113279
p__Proteobacteria	c__Betaproteobacteria	o__Neisseriales	f__Neisseriaceae	g__Leeia			LLW_7	4.2369	0.023188
p__Firmicutes	c__Negativicutes	o__Selenomonadales	f__Veillonellaceae	g__Mitsuokella			LLW_7	2.98906	0.0118725
p__Bacteroidetes	c__Bacteroidia	o__Bacteroidales	f__Prevotellaceae	g__norank_f__Prevotellaceae			LLW_7	3.5282	0.0417758
p__Firmicutes	c__Negativicutes	o__Selenomonadales	f__Veillonellaceae	g__norank_f__Veillonellaceae			LLW_7	3.83175	0.00163286
p__Cyanobacteria	c__Cyanobacteria	o__Gastranaerophilales	f__norank_o__Gastranaerophilales	g__norank_o__Gastranaerophilales			LLW_7	2.91001	0.036447
p__Tenericutes	c__Mollicutes	o__Mollicutes_RF9	f__norank_o__Mollicutes_RF9	g__norank_o__Mollicutes_RF9			LLW_7	3.30512	0.00841468
p__Firmicutes	c__Clostridia	o__Clostridiales	f__Lachnospiraceae	g__Pseudobutyrivibrio			LLW_7	2.8867	0.0497871
p__Firmicutes	c__Clostridia	o__Clostridiales	f__Ruminococcaceae	g__Ruminococcaceae_UCG-004			LLW_7	2.99215	0.0109478
p__Firmicutes	c__Clostridia	o__Clostridiales	f__Ruminococcaceae	g__Ruminococcaceae_UCG-013			LLW_7	2.77118	0.00841468
p__Firmicutes	c__Clostridia	o__Clostridiales	f__Ruminococcaceae	g__Ruminococcaceae_UCG-014			LLW_7	3.71779	0.00624469
p__Firmicutes	c__Bacilli	o__Lactobacillales	f__Streptococcaceae	g__Streptococcus			LLW_7	4.40381	0.0249705
p__Spirochaetae	c__Spirochaetes	o__Spirochaetales	f__Spirochaetaceae	g__Treponema_2			LLW_7	4.30568	0.0246802
p__Firmicutes	c__Clostridia	o__Clostridiales	f__Lachnospiraceae	g__unclassified_f__Lachnospiraceae			LLW_7	4.32297	0.0497871
p__Firmicutes	c__Negativicutes	o__Selenomonadales	f__Veillonellaceae	g__unclassified_f__Veillonellaceae			LLW_7	2.9922	0.00854298
p__Proteobacteria	c__Alphaproteobacteria	o__Caulobacterales	f__Caulobacteraceae	g__Brevundimonas			LLW_7	2.19351	0.0216911
p__Firmicutes	c__Negativicutes	o__Selenomonadales	f__Acidaminococcaceae	g__Acidaminococcus			SLW_7	2.07634	0.047607
p__Bacteroidetes	c__Flavobacteriia	o__Flavobacteriales	f__Flavobacteriaceae	g__Empedobacter			SLW_7	2.52223	0.0345016
p__Firmicutes	c__Negativicutes	o__Selenomonadales	f__Veillonellaceae	g__Megamonas			SLW_7	3.12062	0.00296192
p__Firmicutes	c__Negativicutes	o__Selenomonadales	f__Veillonellaceae	g__Megasphaera			SLW_7	4.25565	0.00268743
p__Bacteroidetes	c__Bacteroidia	o__Bacteroidales	f__Prevotellaceae	g__Prevotella_7			SLW_7	3.37768	0.0288166
p__Proteobacteria	c__Gammaproteobacteria	o__Pasteurellales	f__Pasteurellaceae	g__Actinobacillus	s__Actinobacillus_minor		ErHL_7	2.75142	0.0196183
p__Firmicutes	c__Clostridia	o__Clostridiales	f__Christensenellaceae	g__Christensenellaceae_R-7_group	s__bacterium_YE57		ErHL_7	2.09276	0.0289863
p__Actinobacteria	c__Actinobacteria	o__Corynebacteriales	f__Corynebacteriaceae	g__Corynebacterium_1	s__Corynebacterium_freneyi		ErHL_7	3.1935	0.00432024
p__Firmicutes	c__Clostridia	o__Clostridiales	f__Ruminococcaceae	g__Anaerotruncus	s__gut_metagenome_g__Anaerotruncus		ErHL_7	2.07577	0.00735923
p__Firmicutes	c__Clostridia	o__Clostridiales	f__Ruminococcaceae	g__Ruminiclostridium_6	s__gut_metagenome_g__Ruminiclostridium_6		ErHL_7	2.64588	0.0276398
p__Firmicutes	c__Clostridia	o__Clostridiales	f__Ruminococcaceae	g__Ruminococcaceae_UCG-014	s__gut_metagenome_g__Ruminococcaceae_UCG-014		ErHL_7	2.44789	0.00371635
p__Firmicutes	c__Bacilli	o__Lactobacillales	f__Lactobacillaceae	g__Lactobacillus	s__Lactobacillus_pontis		ErHL_7	2.86811	0.00238379
p__Bacteroidetes	c__Bacteroidia	o__Bacteroidales	f__Porphyromonadaceae	g__Parabacteroides	s__Porphyromonadaceae_bacterium_DJF_B175		ErHL_7	3.75776	0.0214484
p__Firmicutes	c__Clostridia	o__Clostridiales	f__Ruminococcaceae	g__Ruminococcus_1	s__Ruminococcus_bicirculans		ErHL_7	2.16208	0.0214525
p__Firmicutes	c__Erysipelotrichia	o__Erysipelotrichales	f__Erysipelotrichaceae	g__unclassified_f__Erysipelotrichaceae	s__unclassified_f__Erysipelotrichaceae		ErHL_7	2.06094	0.0181936
p__Firmicutes	c__Clostridia	o__Clostridiales	f__Ruminococcaceae	g__[Eubacterium]_coprostanoligenes_group	s__unclassified_g__[Eubacterium]_coprostanoligenes_group		ErHL_7	3.12785	0.0106323
p__Firmicutes	c__Clostridia	o__Clostridiales	f__Lachnospiraceae	g__[Eubacterium]_ruminantium_group	s__unclassified_g__[Eubacterium]_ruminantium_group		ErHL_7	2.45621	0.0060079
p__Firmicutes	c__Clostridia	o__Clostridiales	f__Lachnospiraceae	g__Butyrivibrio	s__unclassified_g__Butyrivibrio		ErHL_7	2.17807	0.0187439
p__Firmicutes	c__Erysipelotrichia	o__Erysipelotrichales	f__Erysipelotrichaceae	g__Erysipelotrichaceae_UCG-004	s__unclassified_g__Erysipelotrichaceae_UCG-004		ErHL_7	2.3438	0.0445514
p__Firmicutes	c__Clostridia	o__Clostridiales	f__Family_XIII	g__Family_XIII_AD3011_group	s__unclassified_g__Family_XIII_AD3011_group		ErHL_7	2.83269	0.00199647
p__Firmicutes	c__Clostridia	o__Clostridiales	f__Lachnospiraceae	g__Howardella	s__unclassified_g__Howardella		ErHL_7	2.16344	0.0491054
p__Firmicutes	c__Clostridia	o__Clostridiales	f__Lachnospiraceae	g__Lachnoclostridium	s__unclassified_g__Lachnoclostridium		ErHL_7	2.46605	0.0297591
p__Firmicutes	c__Clostridia	o__Clostridiales	f__Lachnospiraceae	g__Lachnospiraceae_NK4A136_group	s__unclassified_g__Lachnospiraceae_NK4A136_group		ErHL_7	3.01178	0.00290273
p__Firmicutes	c__Clostridia	o__Clostridiales	f__Lachnospiraceae	g__Lachnospiraceae_UCG-003	s__unclassified_g__Lachnospiraceae_UCG-003		ErHL_7	2.63743	0.00318818
p__Firmicutes	c__Clostridia	o__Clostridiales	f__Clostridiales_vadinBB60_group	g__norank_f__Clostridiales_vadinBB60_group	s__unclassified_g__norank_f__Clostridiales_vadinBB60_group		ErHL_7	2.45873	0.00871517
p__Firmicutes	c__Erysipelotrichia	o__Erysipelotrichales	f__Erysipelotrichaceae	g__norank_f__Erysipelotrichaceae	s__unclassified_g__norank_f__Erysipelotrichaceae		ErHL_7	3.14691	0.00432024
p__Proteobacteria	c__Alphaproteobacteria	o__Rickettsiales	f__Rickettsiales_Incertae_Sedis	g__norank_f__Rickettsiales_Incertae_Sedis	s__unclassified_g__norank_f__Rickettsiales_Incertae_Sedis		ErHL_7	2.15113	0.0327696
p__Firmicutes	c__Clostridia	o__Clostridiales	f__Ruminococcaceae	g__Ruminiclostridium_6	s__unclassified_g__Ruminiclostridium_6		ErHL_7	2.3274	0.00388859
p__Firmicutes	c__Clostridia	o__Clostridiales	f__Ruminococcaceae	g__Ruminococcaceae_UCG-002	s__unclassified_g__Ruminococcaceae_UCG-002		ErHL_7	2.29806	0.0374269
p__Firmicutes	c__Clostridia	o__Clostridiales	f__Ruminococcaceae	g__Ruminococcaceae_UCG-005	s__unclassified_g__Ruminococcaceae_UCG-005		ErHL_7	3.89976	0.0394028
p__Firmicutes	c__Clostridia	o__Clostridiales	f__Ruminococcaceae	g__Ruminococcaceae_UCG-010	s__unclassified_g__Ruminococcaceae_UCG-010		ErHL_7	2.61706	0.0113279
p__Firmicutes	c__Clostridia	o__Clostridiales	f__Ruminococcaceae	g__Ruminococcus_1	s__unclassified_g__Ruminococcus_1		ErHL_7	3.07796	0.0106323
p__Proteobacteria	c__Betaproteobacteria	o__Burkholderiales	f__Alcaligenaceae	g__Sutterella	s__unclassified_g__Sutterella		ErHL_7	2.75862	0.00458042
p__Bacteroidetes	c__Bacteroidia	o__Bacteroidales	f__unclassified_o__Bacteroidales	g__unclassified_o__Bacteroidales	s__unclassified_o__Bacteroidales		ErHL_7	3.04703	0.0179971
p__Firmicutes	c__Clostridia	o__Clostridiales	f__Lachnospiraceae	g__[Bacteroides]_pectinophilus_group	s__uncultured_bacterium_g__[Bacteroides]_pectinophilus_group		ErHL_7	2.0684	0.0107415
p__Firmicutes	c__Clostridia	o__Clostridiales	f__Ruminococcaceae	g__[Eubacterium]_coprostanoligenes_group	s__uncultured_bacterium_g__[Eubacterium]_coprostanoligenes_group		ErHL_7	2.38362	0.0313673
p__Proteobacteria	c__Deltaproteobacteria	o__Desulfovibrionales	f__Desulfovibrionaceae	g__Desulfovibrio	s__uncultured_bacterium_g__Desulfovibrio		ErHL_7	2.4471	0.0339122
p__Firmicutes	c__Erysipelotrichia	o__Erysipelotrichales	f__Erysipelotrichaceae	g__Erysipelotrichaceae_UCG-004	s__uncultured_bacterium_g__Erysipelotrichaceae_UCG-004		ErHL_7	2.71773	0.0387176
p__Bacteroidetes	c__Bacteroidia	o__Bacteroidales	f__Bacteroidales_RF16_group	g__norank_f__Bacteroidales_RF16_group	s__uncultured_bacterium_g__norank_f__Bacteroidales_RF16_group		ErHL_7	3.41155	0.0249705
p__Firmicutes	c__Clostridia	o__Clostridiales	f__Clostridiales_vadinBB60_group	g__norank_f__Clostridiales_vadinBB60_group	s__uncultured_bacterium_g__norank_f__Clostridiales_vadinBB60_group		ErHL_7	2.44387	0.0027407
p__Firmicutes	c__Clostridia	o__Clostridiales	f__Ruminococcaceae	g__Oscillospira	s__uncultured_bacterium_g__Oscillospira		ErHL_7	2.27532	0.0146879
p__Bacteroidetes	c__Bacteroidia	o__Bacteroidales	f__Porphyromonadaceae	g__Parabacteroides	s__uncultured_bacterium_g__Parabacteroides		ErHL_7	3.03475	0.0313673
p__Bacteroidetes	c__Bacteroidia	o__Bacteroidales	f__Prevotellaceae	g__Prevotella_1	s__uncultured_bacterium_g__Prevotella_1		ErHL_7	3.55609	0.0100284
p__Bacteroidetes	c__Bacteroidia	o__Bacteroidales	f__Rikenellaceae	g__Rikenellaceae_RC9_gut_group	s__uncultured_bacterium_g__Rikenellaceae_RC9_gut_group		ErHL_7	3.51947	0.0112069
p__Firmicutes	c__Clostridia	o__Clostridiales	f__Ruminococcaceae	g__Ruminiclostridium_6	s__uncultured_bacterium_g__Ruminiclostridium_6		ErHL_7	3.0693	0.00466975
p__Firmicutes	c__Clostridia	o__Clostridiales	f__Ruminococcaceae	g__Ruminococcaceae_NK4A214_group	s__uncultured_bacterium_g__Ruminococcaceae_NK4A214_group		ErHL_7	2.00608	0.0369144
p__Firmicutes	c__Clostridia	o__Clostridiales	f__Ruminococcaceae	g__Ruminococcaceae_UCG-002	s__uncultured_bacterium_g__Ruminococcaceae_UCG-002		ErHL_7	2.86426	0.00388859
p__Firmicutes	c__Clostridia	o__Clostridiales	f__Ruminococcaceae	g__Ruminococcaceae_UCG-005	s__uncultured_bacterium_g__Ruminococcaceae_UCG-005		ErHL_7	3.38779	0.0120216
p__Firmicutes	c__Clostridia	o__Clostridiales	f__Ruminococcaceae	g__Ruminococcaceae_UCG-010	s__uncultured_bacterium_g__Ruminococcaceae_UCG-010		ErHL_7	3.16231	0.0178922
p__Firmicutes	c__Clostridia	o__Clostridiales	f__Ruminococcaceae	g__Ruminococcaceae_UCG-013	s__uncultured_bacterium_g__Ruminococcaceae_UCG-013		ErHL_7	2.36778	0.00831683
p__Bacteroidetes	c__Bacteroidia	o__Bacteroidales	f__Rikenellaceae	g__dgA-11_gut_group	s__uncultured_Bacteroidales_bacterium_g__dgA-11_gut_group		ErHL_7	2.95968	0.034444
p__Firmicutes	c__Clostridia	o__Clostridiales	f__Ruminococcaceae	g__Ruminococcus_1	s__uncultured_Firmicutes_bacterium_g__Ruminococcus_1		ErHL_7	2.92218	0.0276398
p__Tenericutes	c__Mollicutes	o__Mollicutes_RF9	f__norank_o__Mollicutes_RF9	g__norank_o__Mollicutes_RF9	s__uncultured_organism_g__norank_o__Mollicutes_RF9		ErHL_7	2.3784	0.00627722
p__Firmicutes	c__Clostridia	o__Clostridiales	f__Ruminococcaceae	g__Ruminococcaceae_UCG-005	s__uncultured_organism_g__Ruminococcaceae_UCG-005		ErHL_7	2.37215	0.014752
p__Firmicutes	c__Clostridia	o__Clostridiales	f__Clostridiales_vadinBB60_group	g__norank_f__Clostridiales_vadinBB60_group	s__uncultured_rumen_bacterium_4C28d-15		ErHL_7	2.10474	0.0287286
p__Firmicutes	c__Negativicutes	o__Selenomonadales	f__Veillonellaceae	g__Anaerovibrio	s__uncultured_rumen_bacterium_g__Anaerovibrio		ErHL_7	3.04404	0.0222665
p__Bacteroidetes	c__Bacteroidia	o__Bacteroidales	f__Rikenellaceae	g__hoa5-07d05_gut_group	s__uncultured_rumen_bacterium_g__hoa5-07d05_gut_group		ErHL_7	2.45294	0.0345016
p__Firmicutes	c__Clostridia	o__Clostridiales	f__Ruminococcaceae	g__Ruminococcaceae_NK4A214_group	s__uncultured_rumen_bacterium_g__Ruminococcaceae_NK4A214_group		ErHL_7	3.11687	0.0258623
p__Firmicutes	c__Erysipelotrichia	o__Erysipelotrichales	f__Erysipelotrichaceae	g__norank_f__Erysipelotrichaceae	s__uncultured_Solobacterium_sp_		ErHL_7	2.45195	0.00592452
p__Spirochaetae	c__Spirochaetes	o__Spirochaetales	f__Brachyspiraceae	g__Brachyspira	s__Brachyspira_intermedia		LLW_7	2.46196	0.0166889
p__Firmicutes	c__Clostridia	o__Clostridiales	f__Ruminococcaceae	g__[Eubacterium]_coprostanoligenes_group	s__gut_metagenome_g__[Eubacterium]_coprostanoligenes_group		LLW_7	2.76435	0.033845
p__Firmicutes	c__Negativicutes	o__Selenomonadales	f__Veillonellaceae	g__Mitsuokella	s__Mitsuokella_jalaludinii		LLW_7	2.98425	0.0118725
p__Firmicutes	c__Bacilli	o__Lactobacillales	f__Streptococcaceae	g__Streptococcus	s__Streptococcus_hyointestinalis		LLW_7	3.28251	0.0308464
p__Firmicutes	c__Clostridia	o__Clostridiales	f__Lachnospiraceae	g__unclassified_f__Lachnospiraceae	s__unclassified_f__Lachnospiraceae		LLW_7	4.32297	0.0497871
p__Firmicutes	c__Negativicutes	o__Selenomonadales	f__Veillonellaceae	g__unclassified_f__Veillonellaceae	s__unclassified_f__Veillonellaceae		LLW_7	2.9922	0.00854298
p__Firmicutes	c__Clostridia	o__Clostridiales	f__Family_XIII	g__[Eubacterium]_brachy_group	s__unclassified_g__[Eubacterium]_brachy_group		LLW_7	2.74658	0.0403387
p__Firmicutes	c__Clostridia	o__Clostridiales	f__Lachnospiraceae	g__[Eubacterium]_xylanophilum_group	s__unclassified_g__[Eubacterium]_xylanophilum_group		LLW_7	3.16633	0.0380442
p__Proteobacteria	c__Gammaproteobacteria	o__Pasteurellales	f__Pasteurellaceae	g__Actinobacillus	s__unclassified_g__Actinobacillus		LLW_7	2.68207	0.0119783
p__Firmicutes	c__Negativicutes	o__Selenomonadales	f__Veillonellaceae	g__Anaerovibrio	s__unclassified_g__Anaerovibrio		LLW_7	2.97755	0.0111415
p__Actinobacteria	c__Actinobacteria	o__Corynebacteriales	f__Corynebacteriaceae	g__Corynebacterium	s__unclassified_g__Corynebacterium		LLW_7	2.40205	0.0390074
p__Proteobacteria	c__Epsilonproteobacteria	o__Campylobacterales	f__Helicobacteraceae	g__Helicobacter	s__unclassified_g__Helicobacter		LLW_7	3.78243	0.0115394
p__Firmicutes	c__Clostridia	o__Clostridiales	f__Lachnospiraceae	g__Lachnospira	s__unclassified_g__Lachnospira		LLW_7	3.10436	0.0165365
p__Firmicutes	c__Clostridia	o__Clostridiales	f__Lachnospiraceae	g__Lachnospiraceae_NK3A20_group	s__unclassified_g__Lachnospiraceae_NK3A20_group		LLW_7	2.0686	0.0431843
p__Firmicutes	c__Clostridia	o__Clostridiales	f__Lachnospiraceae	g__Lachnospiraceae_UCG-001	s__unclassified_g__Lachnospiraceae_UCG-001		LLW_7	2.48269	0.0117342
p__Firmicutes	c__Clostridia	o__Clostridiales	f__Ruminococcaceae	g__norank_f__Ruminococcaceae	s__unclassified_g__norank_f__Ruminococcaceae		LLW_7	2.48217	0.0394028
p__Firmicutes	c__Clostridia	o__Clostridiales	f__Lachnospiraceae	g__Pseudobutyrivibrio	s__unclassified_g__Pseudobutyrivibrio		LLW_7	2.8867	0.0497871
p__Firmicutes	c__Clostridia	o__Clostridiales	f__Ruminococcaceae	g__Ruminococcaceae_UCG-004	s__unclassified_g__Ruminococcaceae_UCG-004		LLW_7	2.97947	0.0109478
p__Firmicutes	c__Clostridia	o__Clostridiales	f__Ruminococcaceae	g__Ruminococcaceae_UCG-013	s__unclassified_g__Ruminococcaceae_UCG-013		LLW_7	2.19614	0.0271774
p__Firmicutes	c__Clostridia	o__Clostridiales	f__Ruminococcaceae	g__Ruminococcaceae_UCG-014	s__unclassified_g__Ruminococcaceae_UCG-014		LLW_7	3.34418	0.00309559
p__Firmicutes	c__Bacilli	o__Lactobacillales	f__Streptococcaceae	g__Streptococcus	s__unclassified_g__Streptococcus		LLW_7	4.36943	0.0321097
p__Spirochaetae	c__Spirochaetes	o__Spirochaetales	f__Spirochaetaceae	g__Treponema_2	s__unclassified_g__Treponema_2		LLW_7	4.02248	0.0183156
p__Firmicutes	c__Clostridia	o__Clostridiales	f__Ruminococcaceae	g__Anaerotruncus	s__uncultured_bacterium_g__Anaerotruncus		LLW_7	2.7987	0.00951419
p__Firmicutes	c__Erysipelotrichia	o__Erysipelotrichales	f__Erysipelotrichaceae	g__Asteroleplasma	s__uncultured_bacterium_g__Asteroleplasma		LLW_7	2.42846	0.0287004
p__Firmicutes	c__Negativicutes	o__Selenomonadales	f__Veillonellaceae	g__Dialister	s__uncultured_bacterium_g__Dialister		LLW_7	3.34987	0.0104403
p__Proteobacteria	c__Betaproteobacteria	o__Neisseriales	f__Neisseriaceae	g__Leeia	s__uncultured_bacterium_g__Leeia		LLW_7	4.2369	0.023188
p__Bacteroidetes	c__Bacteroidia	o__Bacteroidales	f__Prevotellaceae	g__norank_f__Prevotellaceae	s__uncultured_bacterium_g__norank_f__Prevotellaceae		LLW_7	3.5282	0.0417758
p__Cyanobacteria	c__Cyanobacteria	o__Gastranaerophilales	f__norank_o__Gastranaerophilales	g__norank_o__Gastranaerophilales	s__uncultured_bacterium_g__norank_o__Gastranaerophilales		LLW_7	2.81843	0.036447
p__Tenericutes	c__Mollicutes	o__Mollicutes_RF9	f__norank_o__Mollicutes_RF9	g__norank_o__Mollicutes_RF9	s__uncultured_bacterium_g__norank_o__Mollicutes_RF9		LLW_7	3.06232	0.00658216
p__Bacteroidetes	c__Bacteroidia	o__Bacteroidales	f__Prevotellaceae	g__Prevotella_7	s__uncultured_bacterium_g__Prevotella_7		LLW_7	3.28377	0.00854298
p__Firmicutes	c__Clostridia	o__Clostridiales	f__Ruminococcaceae	g__Ruminococcaceae_UCG-014	s__uncultured_bacterium_g__Ruminococcaceae_UCG-014		LLW_7	3.0815	0.00681722
p__Firmicutes	c__Clostridia	o__Clostridiales	f__Lachnospiraceae	g__Roseburia	s__uncultured_Lachnospiraceae_bacterium_g__Roseburia		LLW_7	2.80394	0.043601
p__Firmicutes	c__Clostridia	o__Clostridiales	f__Ruminococcaceae	g__Ruminococcaceae_UCG-013	s__uncultured_organism_g__Ruminococcaceae_UCG-013		LLW_7	2.50695	0.0118767
p__Firmicutes	c__Negativicutes	o__Selenomonadales	f__Veillonellaceae	g__norank_f__Veillonellaceae	s__uncultured_rumen_bacterium_4C28d-2		LLW_7	3.49252	0.0345016
p__Firmicutes	c__Clostridia	o__Clostridiales	f__Ruminococcaceae	g__Ruminococcaceae_UCG-014	s__uncultured_rumen_bacterium_g__Ruminococcaceae_UCG-014		LLW_7	2.28559	0.025843
p__Firmicutes	c__Clostridia	o__Clostridiales	f__Ruminococcaceae	g__Ruminococcaceae_UCG-014	s__uncultured_Ruminococcaceae_bacterium_g__Ruminococcaceae_UCG-014		LLW_7	3.1726	0.0188591
p__Firmicutes	c__Negativicutes	o__Selenomonadales	f__Veillonellaceae	g__norank_f__Veillonellaceae	s__Veillonellaceae_bacterium_DJF_CR19		LLW_7	3.21148	0.0226728
p__Firmicutes	c__Negativicutes	o__Selenomonadales	f__Acidaminococcaceae	g__Acidaminococcus	s__Acidaminococcus_fermentans_DSM_20731		SLW_7	2.07633	0.047607
p__Bacteroidetes	c__Bacteroidia	o__Bacteroidales	f__Bacteroidaceae	g__Bacteroides	s__Bacteroides_plebeius		SLW_7	2.66764	0.0286099
p__Firmicutes	c__Negativicutes	o__Selenomonadales	f__Veillonellaceae	g__Megasphaera	s__Megasphaera_elsdenii_DSM_20460		SLW_7	4.22706	0.00248991
p__Firmicutes	c__Negativicutes	o__Selenomonadales	f__Veillonellaceae	g__Megamonas	s__unclassified_g__Megamonas		SLW_7	3.12073	0.00296192
p__Firmicutes	c__Negativicutes	o__Selenomonadales	f__Veillonellaceae	g__Megasphaera	s__unclassified_g__Megasphaera		SLW_7	3.05972	0.00296192
p__Bacteroidetes	c__Bacteroidia	o__Bacteroidales	f__Prevotellaceae	g__Prevotella_7	s__unclassified_g__Prevotella_7		SLW_7	3.34543	0.0293287
p__Actinobacteria	c__Actinobacteria	o__Coriobacteriales	f__Coriobacteriaceae	g__Collinsella	s__uncultured_bacterium_g__Collinsella		SLW_7	3.2357	0.046959
p__Bacteroidetes	c__Flavobacteriia	o__Flavobacteriales	f__Flavobacteriaceae	g__Empedobacter	s__uncultured_bacterium_g__Empedobacter		SLW_7	2.44198	0.0345016
p__Actinobacteria	c__Actinobacteria	o__Coriobacteriales	f__Coriobacteriaceae	g__Enterorhabdus	s__uncultured_bacterium_g__Enterorhabdus		SLW_7	2.07065	0.0294077
p__Firmicutes	c__Clostridia	o__Clostridiales	f__Christensenellaceae	g__Christensenellaceae_R-7_group	s__bacterium_YE57	OTU1014	ErHL_7	2.08989	0.0289863
p__Firmicutes	c__Clostridia	o__Clostridiales	f__Ruminococcaceae	g__Ruminococcaceae_UCG-013	s__uncultured_bacterium_g__Ruminococcaceae_UCG-013	OTU1064	ErHL_7	2.06595	0.0323134
p__Firmicutes	c__Clostridia	o__Clostridiales	f__Ruminococcaceae	g__Oscillospira	s__uncultured_bacterium_g__Oscillospira	OTU1082	ErHL_7	2.09098	0.0392714
p__Bacteroidetes	c__Bacteroidia	o__Bacteroidales	f__Bacteroidales_RF16_group	g__norank_f__Bacteroidales_RF16_group	s__uncultured_bacterium_g__norank_f__Bacteroidales_RF16_group	OTU1114	ErHL_7	3.34014	0.0241096
p__Firmicutes	c__Clostridia	o__Clostridiales	f__Family_XIII	g__Family_XIII_AD3011_group	s__unclassified_g__Family_XIII_AD3011_group	OTU1141	ErHL_7	2.52859	0.0106323
p__Bacteroidetes	c__Bacteroidia	o__Bacteroidales	f__Prevotellaceae	g__Alloprevotella	s__uncultured_bacterium_g__Alloprevotella	OTU1177	ErHL_7	2.56436	0.0468109
p__Proteobacteria	c__Deltaproteobacteria	o__Desulfovibrionales	f__Desulfovibrionaceae	g__Desulfovibrio	s__uncultured_bacterium_g__Desulfovibrio	OTU1180	ErHL_7	2.4055	0.00778418
p__Firmicutes	c__Clostridia	o__Clostridiales	f__Ruminococcaceae	g__Ruminococcus_1	s__Ruminococcus_bicirculans	OTU1197	ErHL_7	2.16991	0.0214525
p__Firmicutes	c__Bacilli	o__Lactobacillales	f__Lactobacillaceae	g__Lactobacillus	s__Lactobacillus_pontis	OTU1198	ErHL_7	2.86816	0.00238379
p__Firmicutes	c__Negativicutes	o__Selenomonadales	f__Veillonellaceae	g__Anaerovibrio	s__uncultured_rumen_bacterium_g__Anaerovibrio	OTU1212	ErHL_7	3.0441	0.0222665
p__Tenericutes	c__Mollicutes	o__Mollicutes_RF9	f__norank_o__Mollicutes_RF9	g__norank_o__Mollicutes_RF9	s__uncultured_bacterium_g__norank_o__Mollicutes_RF9	OTU1241	ErHL_7	2.07592	0.0196183
p__Bacteroidetes	c__Bacteroidia	o__Bacteroidales	f__Porphyromonadaceae	g__Parabacteroides	s__Porphyromonadaceae_bacterium_DJF_B175	OTU1340	ErHL_7	3.01239	0.035466
p__Actinobacteria	c__Actinobacteria	o__Coriobacteriales	f__Coriobacteriaceae	g__norank_f__Coriobacteriaceae	s__uncultured_bacterium_g__norank_f__Coriobacteriaceae	OTU141	ErHL_7	2.70092	0.00272121
p__Firmicutes	c__Clostridia	o__Clostridiales	f__Ruminococcaceae	g__Ruminiclostridium_6	s__unclassified_g__Ruminiclostridium_6	OTU183	ErHL_7	2.3274	0.00388859
p__Firmicutes	c__Clostridia	o__Clostridiales	f__Lachnospiraceae	g__Marvinbryantia	s__uncultured_bacterium_g__Marvinbryantia	OTU188	ErHL_7	3.43584	0.0229183
p__Bacteroidetes	c__Bacteroidia	o__Bacteroidales	f__Rikenellaceae	g__Rikenellaceae_RC9_gut_group	s__uncultured_bacterium_g__Rikenellaceae_RC9_gut_group	OTU195	ErHL_7	2.34713	0.0188591
p__Bacteroidetes	c__Bacteroidia	o__Bacteroidales	f__Rikenellaceae	g__Rikenellaceae_RC9_gut_group	s__uncultured_bacterium_g__Rikenellaceae_RC9_gut_group	OTU238	ErHL_7	3.30549	0.0439806
p__Firmicutes	c__Clostridia	o__Clostridiales	f__Lachnospiraceae	g__Coprococcus_1	s__unclassified_g__Coprococcus_1	OTU247	ErHL_7	2.09239	0.0122711
p__Firmicutes	c__Bacilli	o__Lactobacillales	f__Lactobacillaceae	g__Lactobacillus	s__unclassified_g__Lactobacillus	OTU269	ErHL_7	2.25255	0.0345016
p__Bacteroidetes	c__Bacteroidia	o__Bacteroidales	f__Bacteroidales_S24-7_group	g__norank_f__Bacteroidales_S24-7_group	s__uncultured_bacterium_g__norank_f__Bacteroidales_S24-7_group	OTU276	ErHL_7	2.10174	0.0345016
p__Firmicutes	c__Erysipelotrichia	o__Erysipelotrichales	f__Erysipelotrichaceae	g__norank_f__Erysipelotrichaceae	s__unclassified_g__norank_f__Erysipelotrichaceae	OTU28	ErHL_7	3.0207	0.00613609
p__Firmicutes	c__Clostridia	o__Clostridiales	f__Ruminococcaceae	g__Ruminococcaceae_UCG-014	s__gut_metagenome_g__Ruminococcaceae_UCG-014	OTU292	ErHL_7	2.40877	0.00405662
p__Bacteroidetes	c__Bacteroidia	o__Bacteroidales	f__Prevotellaceae	g__Prevotella_1	s__uncultured_bacterium_g__Prevotella_1	OTU295	ErHL_7	3.13738	0.0282277
p__Bacteroidetes	c__Bacteroidia	o__Bacteroidales	f__Rikenellaceae	g__Rikenellaceae_RC9_gut_group	s__uncultured_bacterium_g__Rikenellaceae_RC9_gut_group	OTU315	ErHL_7	2.7386	0.0106323
p__Bacteroidetes	c__Bacteroidia	o__Bacteroidales	f__unclassified_o__Bacteroidales	g__unclassified_o__Bacteroidales	s__unclassified_o__Bacteroidales	OTU316	ErHL_7	2.55697	0.0461427
p__Bacteroidetes	c__Bacteroidia	o__Bacteroidales	f__Prevotellaceae	g__Prevotellaceae_UCG-001	s__uncultured_bacterium_g__Prevotellaceae_UCG-001	OTU322	ErHL_7	3.42373	0.046266
p__Firmicutes	c__Clostridia	o__Clostridiales	f__Lachnospiraceae	g__Lachnospiraceae_NK4A136_group	s__unclassified_g__Lachnospiraceae_NK4A136_group	OTU328	ErHL_7	2.73549	0.00362507
p__Proteobacteria	c__Betaproteobacteria	o__Burkholderiales	f__Alcaligenaceae	g__Sutterella	s__unclassified_g__Sutterella	OTU332	ErHL_7	2.34474	0.0216911
p__Firmicutes	c__Clostridia	o__Clostridiales	f__Lachnospiraceae	g__[Bacteroides]_pectinophilus_group	s__uncultured_bacterium_g__[Bacteroides]_pectinophilus_group	OTU334	ErHL_7	2.06846	0.0107415
p__Bacteroidetes	c__Bacteroidia	o__Bacteroidales	f__Prevotellaceae	g__Prevotella_1	s__uncultured_bacterium_g__Prevotella_1	OTU342	ErHL_7	3.34633	0.00718563
p__Spirochaetae	c__Spirochaetes	o__Spirochaetales	f__Spirochaetaceae	g__Treponema_2	s__uncultured_bacterium_g__Treponema_2	OTU343	ErHL_7	3.07029	0.0488007
p__Firmicutes	c__Clostridia	o__Clostridiales	f__Ruminococcaceae	g__Ruminococcaceae_NK4A214_group	s__uncultured_rumen_bacterium_g__Ruminococcaceae_NK4A214_group	OTU359	ErHL_7	3.11687	0.0258623
p__Firmicutes	c__Clostridia	o__Clostridiales	f__Lachnospiraceae	g__[Eubacterium]_ruminantium_group	s__unclassified_g__[Eubacterium]_ruminantium_group	OTU36	ErHL_7	2.29994	0.00322017
p__Firmicutes	c__Clostridia	o__Clostridiales	f__Ruminococcaceae	g__Ruminococcaceae_UCG-005	s__uncultured_bacterium_g__Ruminococcaceae_UCG-005	OTU363	ErHL_7	3.00031	0.013833
p__Firmicutes	c__Clostridia	o__Clostridiales	f__Ruminococcaceae	g__unclassified_f__Ruminococcaceae	s__unclassified_f__Ruminococcaceae	OTU376	ErHL_7	2.33161	0.0403387
p__Firmicutes	c__Erysipelotrichia	o__Erysipelotrichales	f__Erysipelotrichaceae	g__norank_f__Erysipelotrichaceae	s__uncultured_Solobacterium_sp_	OTU377	ErHL_7	2.45195	0.00592452
p__Bacteroidetes	c__Bacteroidia	o__Bacteroidales	f__Prevotellaceae	g__Prevotellaceae_UCG-003	s__unclassified_g__Prevotellaceae_UCG-003	OTU378	ErHL_7	2.75778	0.0216911
p__Firmicutes	c__Clostridia	o__Clostridiales	f__Ruminococcaceae	g__Anaerotruncus	s__unclassified_g__Anaerotruncus	OTU393	ErHL_7	2.3645	0.0428376
p__Firmicutes	c__Clostridia	o__Clostridiales	f__Family_XIII	g__Family_XIII_AD3011_group	s__unclassified_g__Family_XIII_AD3011_group	OTU415	ErHL_7	2.26171	0.000821419
p__Firmicutes	c__Erysipelotrichia	o__Erysipelotrichales	f__Erysipelotrichaceae	g__norank_f__Erysipelotrichaceae	s__unclassified_g__norank_f__Erysipelotrichaceae	OTU420	ErHL_7	2.01393	0.0400257
p__Firmicutes	c__Clostridia	o__Clostridiales	f__Lachnospiraceae	g__Lachnoclostridium	s__unclassified_g__Lachnoclostridium	OTU421	ErHL_7	2.47472	0.046959
p__Firmicutes	c__Clostridia	o__Clostridiales	f__Lachnospiraceae	g__unclassified_f__Lachnospiraceae	s__unclassified_f__Lachnospiraceae	OTU432	ErHL_7	2.56623	0.0455997
p__Firmicutes	c__Clostridia	o__Clostridiales	f__Lachnospiraceae	g__unclassified_f__Lachnospiraceae	s__unclassified_f__Lachnospiraceae	OTU434	ErHL_7	2.42528	0.0312084
p__Firmicutes	c__Clostridia	o__Clostridiales	f__Christensenellaceae	g__Christensenellaceae_R-7_group	s__uncultured_bacterium_g__Christensenellaceae_R-7_group	OTU437	ErHL_7	2.10857	0.0139516
p__Firmicutes	c__Clostridia	o__Clostridiales	f__Lachnospiraceae	g__Howardella	s__unclassified_g__Howardella	OTU462	ErHL_7	2.16382	0.0491054
p__Firmicutes	c__Clostridia	o__Clostridiales	f__Lachnospiraceae	g__unclassified_f__Lachnospiraceae	s__unclassified_f__Lachnospiraceae	OTU464	ErHL_7	2.35144	0.0319225
p__Bacteroidetes	c__Bacteroidia	o__Bacteroidales	f__Rikenellaceae	g__hoa5-07d05_gut_group	s__uncultured_rumen_bacterium_g__hoa5-07d05_gut_group	OTU488	ErHL_7	2.43163	0.0345016
p__Firmicutes	c__Clostridia	o__Clostridiales	f__Ruminococcaceae	g__Ruminococcaceae_UCG-009	s__uncultured_bacterium_g__Ruminococcaceae_UCG-009	OTU493	ErHL_7	2.255	0.0234947
p__Firmicutes	c__Clostridia	o__Clostridiales	f__Ruminococcaceae	g__Ruminiclostridium_6	s__uncultured_bacterium_g__Ruminiclostridium_6	OTU496	ErHL_7	2.59704	0.0065928
p__Firmicutes	c__Clostridia	o__Clostridiales	f__Ruminococcaceae	g__Ruminiclostridium_6	s__uncultured_bacterium_g__Ruminiclostridium_6	OTU515	ErHL_7	2.82264	0.00360946
p__Firmicutes	c__Clostridia	o__Clostridiales	f__Clostridiales_vadinBB60_group	g__norank_f__Clostridiales_vadinBB60_group	s__uncultured_bacterium_g__norank_f__Clostridiales_vadinBB60_group	OTU516	ErHL_7	3.05173	0.0345016
p__Bacteroidetes	c__Bacteroidia	o__Bacteroidales	f__Porphyromonadaceae	g__Parabacteroides	s__Porphyromonadaceae_bacterium_DJF_B175	OTU545	ErHL_7	2.88016	0.00300638
p__Firmicutes	c__Clostridia	o__Clostridiales	f__Lachnospiraceae	g__Lachnospiraceae_UCG-003	s__unclassified_g__Lachnospiraceae_UCG-003	OTU546	ErHL_7	2.63742	0.00318818
p__Bacteroidetes	c__Bacteroidia	o__Bacteroidales	f__Porphyromonadaceae	g__Parabacteroides	s__uncultured_bacterium_g__Parabacteroides	OTU555	ErHL_7	3.04356	0.0375322
p__Firmicutes	c__Clostridia	o__Clostridiales	f__Ruminococcaceae	g__Anaerotruncus	s__gut_metagenome_g__Anaerotruncus	OTU562	ErHL_7	2.07555	0.00735923
p__Firmicutes	c__Clostridia	o__Clostridiales	f__Ruminococcaceae	g__[Eubacterium]_coprostanoligenes_group	s__unclassified_g__[Eubacterium]_coprostanoligenes_group	OTU563	ErHL_7	2.17963	0.0454882
p__Bacteroidetes	c__Bacteroidia	o__Bacteroidales	f__Rikenellaceae	g__dgA-11_gut_group	s__uncultured_Bacteroidales_bacterium_g__dgA-11_gut_group	OTU564	ErHL_7	2.95968	0.034444
p__Bacteroidetes	c__Bacteroidia	o__Bacteroidales	f__Porphyromonadaceae	g__Parabacteroides	s__Porphyromonadaceae_bacterium_DJF_B175	OTU584	ErHL_7	2.87614	0.0211095
p__Firmicutes	c__Clostridia	o__Clostridiales	f__Ruminococcaceae	g__Ruminococcaceae_UCG-010	s__unclassified_g__Ruminococcaceae_UCG-010	OTU598	ErHL_7	2.04207	0.00854298
p__Bacteroidetes	c__Bacteroidia	o__Bacteroidales	f__Porphyromonadaceae	g__Parabacteroides	s__Porphyromonadaceae_bacterium_DJF_B175	OTU6	ErHL_7	2.59632	0.00482795
p__Tenericutes	c__Mollicutes	o__Mollicutes_RF9	f__norank_o__Mollicutes_RF9	g__norank_o__Mollicutes_RF9	s__uncultured_organism_g__norank_o__Mollicutes_RF9	OTU618	ErHL_7	2.33038	0.0131881
p__Proteobacteria	c__Gammaproteobacteria	o__Pasteurellales	f__Pasteurellaceae	g__Actinobacillus	s__Actinobacillus_minor	OTU622	ErHL_7	2.75142	0.0196183
p__Actinobacteria	c__Actinobacteria	o__Corynebacteriales	f__Corynebacteriaceae	g__Corynebacterium_1	s__Corynebacterium_freneyi	OTU626	ErHL_7	3.1935	0.00432024
p__Firmicutes	c__Clostridia	o__Clostridiales	f__Ruminococcaceae	g__Ruminococcaceae_UCG-005	s__unclassified_g__Ruminococcaceae_UCG-005	OTU634	ErHL_7	2.12953	0.00770405
p__Firmicutes	c__Erysipelotrichia	o__Erysipelotrichales	f__Erysipelotrichaceae	g__Erysipelotrichaceae_UCG-004	s__unclassified_g__Erysipelotrichaceae_UCG-004	OTU642	ErHL_7	2.28054	0.00854298
p__Proteobacteria	c__Betaproteobacteria	o__Burkholderiales	f__Alcaligenaceae	g__Sutterella	s__unclassified_g__Sutterella	OTU644	ErHL_7	2.50307	0.0222143
p__Spirochaetae	c__Spirochaetes	o__Spirochaetales	f__Spirochaetaceae	g__Treponema_2	s__uncultured_bacterium_g__Treponema_2	OTU650	ErHL_7	3.17437	0.0240883
p__Firmicutes	c__Clostridia	o__Clostridiales	f__Ruminococcaceae	g__Ruminococcaceae_UCG-004	s__unclassified_g__Ruminococcaceae_UCG-004	OTU665	ErHL_7	2.75779	0.0321097
p__unclassified_k__norank	c__unclassified_k__norank	o__unclassified_k__norank	f__unclassified_k__norank	g__unclassified_k__norank	s__unclassified_k__norank	OTU683	ErHL_7	2.43871	0.0345016
p__Firmicutes	c__Clostridia	o__Clostridiales	f__Ruminococcaceae	g__Ruminococcaceae_UCG-002	s__uncultured_bacterium_g__Ruminococcaceae_UCG-002	OTU716	ErHL_7	2.82136	0.00388859
p__Firmicutes	c__Clostridia	o__Clostridiales	f__Ruminococcaceae	g__Ruminococcaceae_UCG-014	s__unclassified_g__Ruminococcaceae_UCG-014	OTU78	ErHL_7	2.70112	0.0399994
p__Firmicutes	c__Erysipelotrichia	o__Erysipelotrichales	f__Erysipelotrichaceae	g__norank_f__Erysipelotrichaceae	s__unclassified_g__norank_f__Erysipelotrichaceae	OTU786	ErHL_7	2.29026	0.00698759
p__Firmicutes	c__Clostridia	o__Clostridiales	f__Lachnospiraceae	g__unclassified_f__Lachnospiraceae	s__unclassified_f__Lachnospiraceae	OTU842	ErHL_7	2.72329	0.00453221
p__Firmicutes	c__Clostridia	o__Clostridiales	f__Ruminococcaceae	g__Ruminococcaceae_UCG-005	s__unclassified_g__Ruminococcaceae_UCG-005	OTU856	ErHL_7	3.78359	0.0321097
p__Firmicutes	c__Clostridia	o__Clostridiales	f__Lachnospiraceae	g__Lachnospiraceae_NK4A136_group	s__unclassified_g__Lachnospiraceae_NK4A136_group	OTU871	ErHL_7	2.31908	0.0121222
p__Firmicutes	c__Clostridia	o__Clostridiales	f__Ruminococcaceae	g__unclassified_f__Ruminococcaceae	s__unclassified_f__Ruminococcaceae	OTU922	ErHL_7	2.23147	0.00272121
p__Proteobacteria	c__Gammaproteobacteria	o__Aeromonadales	f__Succinivibrionaceae	g__Succinivibrio	s__uncultured_bacterium_g__Succinivibrio	OTU926	ErHL_7	2.31446	0.0491718
p__Proteobacteria	c__Alphaproteobacteria	o__Rickettsiales	f__Rickettsiales_Incertae_Sedis	g__norank_f__Rickettsiales_Incertae_Sedis	s__unclassified_g__norank_f__Rickettsiales_Incertae_Sedis	OTU936	ErHL_7	2.15081	0.0327696
p__Firmicutes	c__Clostridia	o__Clostridiales	f__Ruminococcaceae	g__Ruminiclostridium_6	s__gut_metagenome_g__Ruminiclostridium_6	OTU94	ErHL_7	2.64588	0.0276398
p__Firmicutes	c__Clostridia	o__Clostridiales	f__Ruminococcaceae	g__Ruminococcus_1	s__unclassified_g__Ruminococcus_1	OTU95	ErHL_7	2.74882	0.0113279
p__Actinobacteria	c__Actinobacteria	o__Corynebacteriales	f__Corynebacteriaceae	g__Corynebacterium	s__unclassified_g__Corynebacterium	OTU1074	LLW_7	2.36223	0.0307963
p__Bacteroidetes	c__Bacteroidia	o__Bacteroidales	f__Bacteroidales_S24-7_group	g__norank_f__Bacteroidales_S24-7_group	s__uncultured_bacterium_g__norank_f__Bacteroidales_S24-7_group	OTU1111	LLW_7	2.44685	0.0244523
p__Firmicutes	c__Bacilli	o__Lactobacillales	f__Streptococcaceae	g__Streptococcus	s__unclassified_g__Streptococcus	OTU1126	LLW_7	4.36943	0.0321097
p__Firmicutes	c__Clostridia	o__Clostridiales	f__Ruminococcaceae	g__Ruminococcaceae_UCG-014	s__uncultured_bacterium_g__Ruminococcaceae_UCG-014	OTU1160	LLW_7	2.09006	0.0106323
p__Firmicutes	c__Clostridia	o__Clostridiales	f__Ruminococcaceae	g__Anaerotruncus	s__uncultured_bacterium_g__Anaerotruncus	OTU1170	LLW_7	2.67383	0.033845
p__Bacteroidetes	c__Bacteroidia	o__Bacteroidales	f__Rikenellaceae	g__Rikenellaceae_RC9_gut_group	s__uncultured_bacterium_g__Rikenellaceae_RC9_gut_group	OTU1187	LLW_7	2.17199	0.0260617
p__Firmicutes	c__Negativicutes	o__Selenomonadales	f__Veillonellaceae	g__Anaerovibrio	s__unclassified_g__Anaerovibrio	OTU1210	LLW_7	2.8752	0.00968258
p__Proteobacteria	c__Gammaproteobacteria	o__Aeromonadales	f__Succinivibrionaceae	g__Succinivibrio	s__uncultured_bacterium_g__Succinivibrio	OTU1226	LLW_7	2.19863	0.00923914
p__Firmicutes	c__Negativicutes	o__Selenomonadales	f__Veillonellaceae	g__norank_f__Veillonellaceae	s__uncultured_rumen_bacterium_4C28d-2	OTU1234	LLW_7	3.32409	0.0345016
p__Firmicutes	c__Bacilli	o__Lactobacillales	f__Lactobacillaceae	g__Lactobacillus	s__unclassified_g__Lactobacillus	OTU1245	LLW_7	2.72416	0.0144955
p__Proteobacteria	c__Epsilonproteobacteria	o__Campylobacterales	f__Helicobacteraceae	g__Helicobacter	s__unclassified_g__Helicobacter	OTU186	LLW_7	3.70814	0.0140778
p__Firmicutes	c__Clostridia	o__Clostridiales	f__Ruminococcaceae	g__Ruminococcus_1	s__uncultured_Firmicutes_bacterium_g__Ruminococcus_1	OTU250	LLW_7	2.7504	0.0092255
p__Bacteroidetes	c__Bacteroidia	o__Bacteroidales	f__Prevotellaceae	g__Prevotellaceae_NK3B31_group	s__uncultured_bacterium_g__Prevotellaceae_NK3B31_group	OTU30	LLW_7	2.42037	0.0271774
p__Spirochaetae	c__Spirochaetes	o__Spirochaetales	f__Spirochaetaceae	g__Treponema_2	s__unclassified_g__Treponema_2	OTU338	LLW_7	2.39947	0.0212543
p__Firmicutes	c__Clostridia	o__Clostridiales	f__Ruminococcaceae	g__Ruminococcaceae_UCG-014	s__unclassified_g__Ruminococcaceae_UCG-014	OTU394	LLW_7	3.01769	0.0027539
p__Firmicutes	c__Clostridia	o__Clostridiales	f__Lachnospiraceae	g__[Eubacterium]_xylanophilum_group	s__unclassified_g__[Eubacterium]_xylanophilum_group	OTU435	LLW_7	3.16633	0.0380442
p__Spirochaetae	c__Spirochaetes	o__Spirochaetales	f__Brachyspiraceae	g__Brachyspira	s__Brachyspira_intermedia	OTU460	LLW_7	2.46197	0.0166889
p__Firmicutes	c__Clostridia	o__Clostridiales	f__Lachnospiraceae	g__Lachnospira	s__unclassified_g__Lachnospira	OTU463	LLW_7	3.1025	0.0165365
p__Firmicutes	c__Clostridia	o__Clostridiales	f__Ruminococcaceae	g__[Eubacterium]_coprostanoligenes_group	s__gut_metagenome_g__[Eubacterium]_coprostanoligenes_group	OTU465	LLW_7	2.76435	0.033845
p__Firmicutes	c__Clostridia	o__Clostridiales	f__Ruminococcaceae	g__Ruminococcaceae_UCG-014	s__unclassified_g__Ruminococcaceae_UCG-014	OTU55	LLW_7	2.39078	0.0188591
p__Firmicutes	c__Clostridia	o__Clostridiales	f__Peptococcaceae	g__Peptococcus	s__uncultured_bacterium_g__Peptococcus	OTU597	LLW_7	2.24592	0.0196183
p__Firmicutes	c__Clostridia	o__Clostridiales	f__Ruminococcaceae	g__Ruminococcaceae_UCG-014	s__uncultured_bacterium_g__Ruminococcaceae_UCG-014	OTU601	LLW_7	2.17763	0.0345016
p__Proteobacteria	c__Gammaproteobacteria	o__Pasteurellales	f__Pasteurellaceae	g__Actinobacillus	s__unclassified_g__Actinobacillus	OTU614	LLW_7	2.68202	0.0119783
p__Proteobacteria	c__Betaproteobacteria	o__Burkholderiales	f__Alcaligenaceae	g__Sutterella	s__unclassified_g__Sutterella	OTU615	LLW_7	2.16418	0.0026488
p__Firmicutes	c__Negativicutes	o__Selenomonadales	f__Veillonellaceae	g__unclassified_f__Veillonellaceae	s__unclassified_f__Veillonellaceae	OTU616	LLW_7	2.9922	0.00854298
p__Spirochaetae	c__Spirochaetes	o__Spirochaetales	f__Spirochaetaceae	g__Treponema_2	s__unclassified_g__Treponema_2	OTU620	LLW_7	3.89772	0.0445514
p__Firmicutes	c__Negativicutes	o__Selenomonadales	f__Veillonellaceae	g__norank_f__Veillonellaceae	s__Veillonellaceae_bacterium_DJF_CR19	OTU623	LLW_7	3.21172	0.0226728
p__Firmicutes	c__Negativicutes	o__Selenomonadales	f__Veillonellaceae	g__Mitsuokella	s__Mitsuokella_jalaludinii	OTU625	LLW_7	2.94207	0.0150419
p__Firmicutes	c__Negativicutes	o__Selenomonadales	f__Veillonellaceae	g__Dialister	s__uncultured_bacterium_g__Dialister	OTU631	LLW_7	3.34987	0.0104403
p__Spirochaetae	c__Spirochaetes	o__Spirochaetales	f__Spirochaetaceae	g__Treponema_2	s__uncultured_bacterium_g__Treponema_2	OTU649	LLW_7	3.20346	0.0273065
p__Firmicutes	c__Bacilli	o__Lactobacillales	f__Streptococcaceae	g__Streptococcus	s__Streptococcus_hyointestinalis	OTU654	LLW_7	3.26648	0.0308464
p__Firmicutes	c__Clostridia	o__Clostridiales	f__Ruminococcaceae	g__Ruminococcaceae_UCG-014	s__unclassified_g__Ruminococcaceae_UCG-014	OTU66	LLW_7	2.77885	0.00212805
p__Firmicutes	c__Clostridia	o__Clostridiales	f__Ruminococcaceae	g__Ruminococcaceae_UCG-013	s__uncultured_organism_g__Ruminococcaceae_UCG-013	OTU660	LLW_7	2.5087	0.0118767
p__Proteobacteria	c__Betaproteobacteria	o__Neisseriales	f__Neisseriaceae	g__Leeia	s__uncultured_bacterium_g__Leeia	OTU668	LLW_7	4.2369	0.023188
p__Proteobacteria	c__Deltaproteobacteria	o__Desulfovibrionales	f__Desulfovibrionaceae	g__Desulfovibrio	s__unclassified_g__Desulfovibrio	OTU677	LLW_7	3.5255	0.0132878
p__Firmicutes	c__Negativicutes	o__Selenomonadales	f__Veillonellaceae	g__Anaerovibrio	s__uncultured_bacterium_g__Anaerovibrio	OTU823	LLW_7	3.9668	0.035466
p__Elusimicrobia	c__Elusimicrobia	o__Elusimicrobiales	f__Elusimicrobiaceae	g__Elusimicrobium	s__uncultured_bacterium_g__Elusimicrobium	OTU825	LLW_7	3.06384	0.0488007
p__Bacteroidetes	c__Bacteroidia	o__Bacteroidales	f__Prevotellaceae	g__Prevotella_7	s__uncultured_bacterium_g__Prevotella_7	OTU832	LLW_7	2.40825	0.00854298
p__Bacteroidetes	c__Bacteroidia	o__Bacteroidales	f__Prevotellaceae	g__unclassified_f__Prevotellaceae	s__unclassified_f__Prevotellaceae	OTU834	LLW_7	2.67733	0.00854298
p__Firmicutes	c__Clostridia	o__Clostridiales	f__Lachnospiraceae	g__unclassified_f__Lachnospiraceae	s__unclassified_f__Lachnospiraceae	OTU837	LLW_7	4.33271	0.0260139
p__Firmicutes	c__Clostridia	o__Clostridiales	f__Lachnospiraceae	g__Roseburia	s__uncultured_Lachnospiraceae_bacterium_g__Roseburia	OTU846	LLW_7	2.80349	0.043601
p__Firmicutes	c__Clostridia	o__Clostridiales	f__Lachnospiraceae	g__Lachnospiraceae_UCG-001	s__unclassified_g__Lachnospiraceae_UCG-001	OTU864	LLW_7	2.4833	0.0117342
p__Firmicutes	c__Erysipelotrichia	o__Erysipelotrichales	f__Erysipelotrichaceae	g__Asteroleplasma	s__uncultured_bacterium_g__Asteroleplasma	OTU903	LLW_7	2.36466	0.00567924
p__Firmicutes	c__Clostridia	o__Clostridiales	f__Ruminococcaceae	g__norank_f__Ruminococcaceae	s__unclassified_g__norank_f__Ruminococcaceae	OTU905	LLW_7	2.11966	0.00336824
p__Firmicutes	c__Clostridia	o__Clostridiales	f__Lachnospiraceae	g__Lachnospiraceae_NK3A20_group	s__unclassified_g__Lachnospiraceae_NK3A20_group	OTU931	LLW_7	2.06608	0.0431843
p__Bacteroidetes	c__Bacteroidia	o__Bacteroidales	f__Prevotellaceae	g__norank_f__Prevotellaceae	s__uncultured_bacterium_g__norank_f__Prevotellaceae	OTU949	LLW_7	3.32764	0.0179678
p__Firmicutes	c__Negativicutes	o__Selenomonadales	f__Veillonellaceae	g__norank_f__Veillonellaceae	s__uncultured_rumen_bacterium_4C28d-2	OTU988	LLW_7	2.88862	0.0345016
p__Tenericutes	c__Mollicutes	o__Mollicutes_RF9	f__norank_o__Mollicutes_RF9	g__norank_o__Mollicutes_RF9	s__uncultured_bacterium_g__norank_o__Mollicutes_RF9	OTU997	LLW_7	2.20456	0.000598014
p__Firmicutes	c__Negativicutes	o__Selenomonadales	f__Veillonellaceae	g__Megamonas	s__unclassified_g__Megamonas	OTU1049	SLW_7	3.12098	0.00296192
p__Firmicutes	c__Negativicutes	o__Selenomonadales	f__Veillonellaceae	g__Megasphaera	s__unclassified_g__Megasphaera	OTU1200	SLW_7	3.05984	0.00296192
p__Actinobacteria	c__Actinobacteria	o__Coriobacteriales	f__Coriobacteriaceae	g__Enterorhabdus	s__uncultured_bacterium_g__Enterorhabdus	OTU1207	SLW_7	2.07052	0.0294077
p__Actinobacteria	c__Actinobacteria	o__Coriobacteriales	f__Coriobacteriaceae	g__Collinsella	s__uncultured_bacterium_g__Collinsella	OTU1208	SLW_7	3.2357	0.046959
p__Bacteroidetes	c__Flavobacteriia	o__Flavobacteriales	f__Flavobacteriaceae	g__Empedobacter	s__uncultured_bacterium_g__Empedobacter	OTU1214	SLW_7	2.4661	0.0345016
p__Bacteroidetes	c__Bacteroidia	o__Bacteroidales	f__Prevotellaceae	g__Prevotella_7	s__unclassified_g__Prevotella_7	OTU1268	SLW_7	3.34637	0.0339664
p__Bacteroidetes	c__Bacteroidia	o__Bacteroidales	f__Bacteroidaceae	g__Bacteroides	s__Bacteroides_plebeius	OTU1327	SLW_7	2.66788	0.0286099
p__Firmicutes	c__Bacilli	o__Lactobacillales	f__Lactobacillaceae	g__Lactobacillus	s__unclassified_g__Lactobacillus	OTU1358	SLW_7	2.48833	0.0226728
p__Firmicutes	c__Negativicutes	o__Selenomonadales	f__Veillonellaceae	g__Megasphaera	s__Megasphaera_elsdenii_DSM_20460	OTU1363	SLW_7	4.22708	0.00248991
p__Firmicutes	c__Clostridia	o__Clostridiales	f__Lachnospiraceae	g__Roseburia	s__unclassified_g__Roseburia	OTU140	SLW_7	2.30773	0.00422629
p__Firmicutes	c__Bacilli	o__Lactobacillales	f__Lactobacillaceae	g__Lactobacillus	s__unclassified_g__Lactobacillus	OTU153	SLW_7	3.42983	0.0434442
p__Bacteroidetes	c__Bacteroidia	o__Bacteroidales	f__Prevotellaceae	g__Prevotellaceae_NK3B31_group	s__uncultured_bacterium_g__Prevotellaceae_NK3B31_group	OTU159	SLW_7	2.38471	0.0345016
p__Firmicutes	c__Clostridia	o__Clostridiales	f__Ruminococcaceae	g__Ruminococcaceae_UCG-008	s__uncultured_bacterium_g__Ruminococcaceae_UCG-008	OTU664	SLW_7	3.29804	0.0457945
p__Firmicutes	c__Negativicutes	o__Selenomonadales	f__Acidaminococcaceae	g__Acidaminococcus	s__Acidaminococcus_fermentans_DSM_20731	OTU789	SLW_7	2.07633	0.047607
ErHL_7 = the cecal samples of Erhualian fattening barrows fed with 7% wheat bran replaced basal diet; LLW_7 = the cecal samples of large Large White pigs fed with 7% wheat bran replaced basal diet; SLW_7 = the cecal samples of small Large White fattening barrows fed with 7% wheat bran replaced basal diet.

## Sheet: Table S4
Effects of varying levels of wheat bran dietary fiber on growth performance, fiber digestibility and gut microbiota in Erhualian and Large White pigs
Taoran Du, Pinghua Li , Qing Niu, Guang Pu, Binbin Wang, Gensheng Liu, Pinghui Li, Peipei Niu, Zongping Zhang, Chengwu Wu, Liming Hou, M.S. Hedemanne and Ruihua Huang*
* Correspondence: Ruihua Huang: rhhuang@njau.edu.cn
Table S4 Linear discriminant analysis (LDA) effect size (LEfSe) of cecum microbiota among ErHL-21, LLW-21 and SLW-21
Phylum	Class	Order	Family	Genus	Species	OTU	Enrichment group	LDA-value	P-value
p__Verrucomicrobia							ErHL_21	2.85912	0.00205541
p__Fibrobacteres							ErHL_21	2.31543	0.0109768
p__Spirochaetae							ErHL_21	4.60037	0.00595927
p__Tenericutes							ErHL_21	3.45706	0.0380442
p__Cyanobacteria							LLW_21	2.73602	0.0363054
p__Fibrobacteres	c__Fibrobacteria						ErHL_21	2.31492	0.0109768
p__Tenericutes	c__Mollicutes						ErHL_21	3.45706	0.0380442
p__Spirochaetae	c__Spirochaetes						ErHL_21	4.60037	0.00595927
p__Bacteroidetes	c__unclassified_p__Bacteroidetes						ErHL_21	2.55289	0.00217187
p__Verrucomicrobia	c__Verrucomicrobiae						ErHL_21	2.82376	0.000314533
p__Verrucomicrobia	c__WCHB1-41						ErHL_21	2.03227	0.010817
p__Cyanobacteria	c__Cyanobacteria						LLW_21	2.73602	0.0363054
p__Firmicutes	c__Negativicutes						LLW_21	4.43917	0.0380442
p__Tenericutes	c__Mollicutes	o__Anaeroplasmatales					ErHL_21	3.16154	0.00142531
p__Fibrobacteres	c__Fibrobacteria	o__Fibrobacterales					ErHL_21	2.3154	0.0109768
p__Verrucomicrobia	c__WCHB1-41	o__norank_c__WCHB1-41					ErHL_21	2.03431	0.010817
p__Spirochaetae	c__Spirochaetes	o__Spirochaetales					ErHL_21	4.60037	0.00595927
p__Bacteroidetes	c__unclassified_p__Bacteroidetes	o__unclassified_p__Bacteroidetes					ErHL_21	2.55212	0.00217187
p__Verrucomicrobia	c__Verrucomicrobiae	o__Verrucomicrobiales					ErHL_21	2.82376	0.000314533
p__Cyanobacteria	c__Cyanobacteria	o__Gastranaerophilales					LLW_21	2.73463	0.0363054
p__Firmicutes	c__Negativicutes	o__Selenomonadales					LLW_21	4.43917	0.0380442
p__Proteobacteria	c__Gammaproteobacteria	o__Aeromonadales					SLW_21	4.01752	0.0363054
p__Actinobacteria	c__Actinobacteria	o__Micrococcales					SLW_21	2.4152	0.039916
p__Tenericutes	c__Mollicutes	o__Anaeroplasmatales	f__Anaeroplasmataceae				ErHL_21	3.16165	0.00142531
p__Bacteroidetes	c__Bacteroidia	o__Bacteroidales	f__Bacteroidaceae				ErHL_21	3.48178	0.00325791
p__Bacteroidetes	c__Bacteroidia	o__Bacteroidales	f__Bacteroidales_RF16_group				ErHL_21	3.55067	0.00735923
p__Bacteroidetes	c__Bacteroidia	o__Bacteroidales	f__Bacteroidales_S24-7_group				ErHL_21	4.67049	0.00339922
p__Firmicutes	c__Clostridia	o__Clostridiales	f__Christensenellaceae				ErHL_21	3.32608	0.0394028
p__Firmicutes	c__Clostridia	o__Clostridiales	f__Clostridiales_vadinBB60_group				ErHL_21	3.02021	0.00613609
p__Fibrobacteres	c__Fibrobacteria	o__Fibrobacterales	f__Fibrobacteraceae				ErHL_21	2.3148	0.0109768
p__Verrucomicrobia	c__WCHB1-41	o__norank_c__WCHB1-41	f__norank_c__WCHB1-41				ErHL_21	2.02446	0.010817
p__Bacteroidetes	c__Bacteroidia	o__Bacteroidales	f__Porphyromonadaceae				ErHL_21	3.54501	0.0408099
p__Bacteroidetes	c__Bacteroidia	o__Bacteroidales	f__Rikenellaceae				ErHL_21	3.8469	0.00624469
p__Spirochaetae	c__Spirochaetes	o__Spirochaetales	f__Spirochaetaceae				ErHL_21	4.59955	0.00595927
p__Bacteroidetes	c__Bacteroidia	o__Bacteroidales	f__unclassified_o__Bacteroidales				ErHL_21	2.73717	0.0092255
p__Firmicutes	c__Clostridia	o__Clostridiales	f__unclassified_o__Clostridiales				ErHL_21	2.0002	0.00283982
p__Bacteroidetes	c__unclassified_p__Bacteroidetes	o__unclassified_p__Bacteroidetes	f__unclassified_p__Bacteroidetes				ErHL_21	2.55101	0.00217187
p__Verrucomicrobia	c__Verrucomicrobiae	o__Verrucomicrobiales	f__Verrucomicrobiaceae				ErHL_21	2.82376	0.000314533
p__Firmicutes	c__Negativicutes	o__Selenomonadales	f__Acidaminococcaceae				LLW_21	3.84355	0.0453399
p__Firmicutes	c__Clostridia	o__Clostridiales	f__Lachnospiraceae				LLW_21	4.57124	0.0319225
p__Bacteroidetes	c__Bacteroidia	o__Bacteroidales	f__norank_o__Bacteroidales				LLW_21	2.14364	0.00521077
p__Cyanobacteria	c__Cyanobacteria	o__Gastranaerophilales	f__norank_o__Gastranaerophilales				LLW_21	2.73463	0.0363054
p__Firmicutes	c__Clostridia	o__Clostridiales	f__Peptococcaceae				LLW_21	3.03596	0.0380442
p__Firmicutes	c__Bacilli	o__Bacillales	f__Staphylococcaceae				LLW_21	2.01666	0.0133001
p__Proteobacteria	c__Epsilonproteobacteria	o__Campylobacterales	f__Helicobacteraceae				SLW_21	3.58159	0.046413
p__Proteobacteria	c__Gammaproteobacteria	o__Aeromonadales	f__Succinivibrionaceae				SLW_21	4.01761	0.0363054
p__Firmicutes	c__Negativicutes	o__Selenomonadales	f__Veillonellaceae				SLW_21	4.51226	0.00572025
p__Firmicutes	c__Clostridia	o__Clostridiales	f__Lachnospiraceae	g__[Eubacterium]_eligens_group			ErHL_21	2.45417	0.0188591
p__Firmicutes	c__Clostridia	o__Clostridiales	f__Family_XIII	g__[Eubacterium]_nodatum_group			ErHL_21	2.44978	0.0179971
p__Verrucomicrobia	c__Verrucomicrobiae	o__Verrucomicrobiales	f__Verrucomicrobiaceae	g__Akkermansia			ErHL_21	2.82376	0.000314533
p__Tenericutes	c__Mollicutes	o__Anaeroplasmatales	f__Anaeroplasmataceae	g__Anaeroplasma			ErHL_21	3.16038	0.00142531
p__Bacteroidetes	c__Bacteroidia	o__Bacteroidales	f__Bacteroidaceae	g__Bacteroides			ErHL_21	3.48178	0.00325791
p__Firmicutes	c__Clostridia	o__Clostridiales	f__Lachnospiraceae	g__Butyrivibrio			ErHL_21	2.14015	0.0100606
p__Firmicutes	c__Clostridia	o__Clostridiales	f__Lachnospiraceae	g__Cellulosilyticum			ErHL_21	2.11964	0.000314533
p__Firmicutes	c__Clostridia	o__Clostridiales	f__Christensenellaceae	g__Christensenellaceae_R-7_group			ErHL_21	3.32536	0.0394028
p__Fibrobacteres	c__Fibrobacteria	o__Fibrobacterales	f__Fibrobacteraceae	g__Fibrobacter			ErHL_21	2.3146	0.0109768
p__Firmicutes	c__Clostridia	o__Clostridiales	f__Lachnospiraceae	g__Lachnospiraceae_UCG-003			ErHL_21	2.76081	0.0143283
p__Firmicutes	c__Clostridia	o__Clostridiales	f__Lachnospiraceae	g__Lachnospiraceae_XPB1014_group			ErHL_21	2.70498	0.004574
p__Verrucomicrobia	c__WCHB1-41	o__norank_c__WCHB1-41	f__norank_c__WCHB1-41	g__norank_c__WCHB1-41			ErHL_21	2.02394	0.010817
p__Bacteroidetes	c__Bacteroidia	o__Bacteroidales	f__Bacteroidales_RF16_group	g__norank_f__Bacteroidales_RF16_group			ErHL_21	3.55079	0.00735923
p__Bacteroidetes	c__Bacteroidia	o__Bacteroidales	f__Bacteroidales_S24-7_group	g__norank_f__Bacteroidales_S24-7_group			ErHL_21	4.67049	0.00339922
p__Firmicutes	c__Clostridia	o__Clostridiales	f__Clostridiales_vadinBB60_group	g__norank_f__Clostridiales_vadinBB60_group			ErHL_21	3.02021	0.00613609
p__Firmicutes	c__Clostridia	o__Clostridiales	f__Lachnospiraceae	g__norank_f__Lachnospiraceae			ErHL_21	2.3354	0.000314533
p__Firmicutes	c__Clostridia	o__Clostridiales	f__Ruminococcaceae	g__Oscillibacter			ErHL_21	2.56599	0.0445514
p__Bacteroidetes	c__Bacteroidia	o__Bacteroidales	f__Porphyromonadaceae	g__Parabacteroides			ErHL_21	3.52085	0.0408099
p__Bacteroidetes	c__Bacteroidia	o__Bacteroidales	f__Prevotellaceae	g__Prevotella_1			ErHL_21	3.88191	0.0119515
p__Bacteroidetes	c__Bacteroidia	o__Bacteroidales	f__Prevotellaceae	g__Prevotellaceae_UCG-003			ErHL_21	3.7713	0.0027539
p__Bacteroidetes	c__Bacteroidia	o__Bacteroidales	f__Prevotellaceae	g__Prevotellaceae_UCG-004			ErHL_21	2.04912	0.0361533
p__Firmicutes	c__Negativicutes	o__Selenomonadales	f__Veillonellaceae	g__Quinella			ErHL_21	2.87706	0.0287286
p__Bacteroidetes	c__Bacteroidia	o__Bacteroidales	f__Rikenellaceae	g__Rikenellaceae_RC9_gut_group			ErHL_21	3.81951	0.0188591
p__Firmicutes	c__Clostridia	o__Clostridiales	f__Ruminococcaceae	g__Ruminiclostridium_1			ErHL_21	2.04015	0.0345016
p__Firmicutes	c__Clostridia	o__Clostridiales	f__Ruminococcaceae	g__Ruminiclostridium_6			ErHL_21	3.2787	0.00332062
p__Firmicutes	c__Clostridia	o__Clostridiales	f__Ruminococcaceae	g__Ruminococcaceae_NK4A214_group			ErHL_21	3.0001	0.0140778
p__Firmicutes	c__Clostridia	o__Clostridiales	f__Ruminococcaceae	g__Ruminococcaceae_UCG-001			ErHL_21	3.07532	0.00435243
p__Firmicutes	c__Clostridia	o__Clostridiales	f__Ruminococcaceae	g__Ruminococcaceae_UCG-010			ErHL_21	3.01734	0.0277423
p__Spirochaetae	c__Spirochaetes	o__Spirochaetales	f__Spirochaetaceae	g__Sphaerochaeta			ErHL_21	3.40306	0.0115394
p__Spirochaetae	c__Spirochaetes	o__Spirochaetales	f__Spirochaetaceae	g__Treponema_2			ErHL_21	4.58107	0.00388859
p__Firmicutes	c__Erysipelotrichia	o__Erysipelotrichales	f__Erysipelotrichaceae	g__unclassified_f__Erysipelotrichaceae			ErHL_21	2.48059	0.004574
p__Bacteroidetes	c__Bacteroidia	o__Bacteroidales	f__Prevotellaceae	g__unclassified_f__Prevotellaceae			ErHL_21	3.82287	0.00681722
p__Bacteroidetes	c__Bacteroidia	o__Bacteroidales	f__unclassified_o__Bacteroidales	g__unclassified_o__Bacteroidales			ErHL_21	2.73717	0.0092255
p__Firmicutes	c__Clostridia	o__Clostridiales	f__unclassified_o__Clostridiales	g__unclassified_o__Clostridiales			ErHL_21	2.00063	0.00283982
p__Bacteroidetes	c__unclassified_p__Bacteroidetes	o__unclassified_p__Bacteroidetes	f__unclassified_p__Bacteroidetes	g__unclassified_p__Bacteroidetes			ErHL_21	2.55243	0.00217187
p__Firmicutes	c__Clostridia	o__Clostridiales	f__Lachnospiraceae	g__[Eubacterium]_hallii_group			LLW_21	2.91143	0.0109478
p__Firmicutes	c__Negativicutes	o__Selenomonadales	f__Acidaminococcaceae	g__Acidaminococcus			LLW_21	2.21448	0.0212543
p__Firmicutes	c__Negativicutes	o__Selenomonadales	f__Veillonellaceae	g__Allisonella			LLW_21	2.28759	0.0227213
p__Firmicutes	c__Erysipelotrichia	o__Erysipelotrichales	f__Erysipelotrichaceae	g__Asteroleplasma			LLW_21	2.89154	0.0178922
p__Firmicutes	c__Clostridia	o__Clostridiales	f__Ruminococcaceae	g__Butyricicoccus			LLW_21	3.13884	0.0166796
p__Firmicutes	c__Erysipelotrichia	o__Erysipelotrichales	f__Erysipelotrichaceae	g__Catenisphaera			LLW_21	3.17693	0.0312553
p__Firmicutes	c__Clostridia	o__Clostridiales	f__Lachnospiraceae	g__Dorea			LLW_21	3.62628	0.00309559
p__Actinobacteria	c__Actinobacteria	o__Coriobacteriales	f__Coriobacteriaceae	g__Enterorhabdus			LLW_21	2.4134	0.00483677
p__Firmicutes	c__Erysipelotrichia	o__Erysipelotrichales	f__Erysipelotrichaceae	g__Erysipelotrichaceae_UCG-006			LLW_21	2.24549	0.0108397
p__Firmicutes	c__Clostridia	o__Clostridiales	f__Family_XIII	g__Family_XIII_UCG-001			LLW_21	2.56199	0.0218877
p__Firmicutes	c__Clostridia	o__Clostridiales	f__Lachnospiraceae	g__Fusicatenibacter			LLW_21	2.78599	0.00766935
p__Firmicutes	c__Clostridia	o__Clostridiales	f__Lachnospiraceae	g__Lachnospiraceae_NK3A20_group			LLW_21	2.40685	0.00554443
p__Firmicutes	c__Negativicutes	o__Selenomonadales	f__Veillonellaceae	g__Megasphaera			LLW_21	3.82791	0.00294429
p__Firmicutes	c__Negativicutes	o__Selenomonadales	f__Veillonellaceae	g__Mitsuokella			LLW_21	2.8774	0.0191929
p__Firmicutes	c__Negativicutes	o__Selenomonadales	f__Veillonellaceae	g__norank_f__Veillonellaceae			LLW_21	3.70185	0.00564929
p__Bacteroidetes	c__Bacteroidia	o__Bacteroidales	f__norank_o__Bacteroidales	g__norank_o__Bacteroidales			LLW_21	2.14366	0.00521077
p__Cyanobacteria	c__Cyanobacteria	o__Gastranaerophilales	f__norank_o__Gastranaerophilales	g__norank_o__Gastranaerophilales			LLW_21	2.73463	0.0363054
p__Firmicutes	c__Clostridia	o__Clostridiales	f__Peptococcaceae	g__Peptococcus			LLW_21	3.0293	0.0497871
p__Firmicutes	c__Negativicutes	o__Selenomonadales	f__Acidaminococcaceae	g__Phascolarctobacterium			LLW_21	3.84027	0.0453399
p__Bacteroidetes	c__Bacteroidia	o__Bacteroidales	f__Prevotellaceae	g__Prevotella_2			LLW_21	3.44439	0.0422673
p__Bacteroidetes	c__Bacteroidia	o__Bacteroidales	f__Prevotellaceae	g__Prevotella_7			LLW_21	3.79538	0.00220808
p__Firmicutes	c__Clostridia	o__Clostridiales	f__Lachnospiraceae	g__Roseburia			LLW_21	3.56685	0.0489212
p__Firmicutes	c__Clostridia	o__Clostridiales	f__Ruminococcaceae	g__Ruminococcaceae_UCG-008			LLW_21	3.74745	0.00322494
p__Firmicutes	c__Negativicutes	o__Selenomonadales	f__Veillonellaceae	g__Selenomonas			LLW_21	3.50781	0.0160583
p__Firmicutes	c__Clostridia	o__Clostridiales	f__Lachnospiraceae	g__Shuttleworthia			LLW_21	2.50817	0.0440277
p__Firmicutes	c__Erysipelotrichia	o__Erysipelotrichales	f__Erysipelotrichaceae	g__Solobacterium			LLW_21	3.37091	0.0249705
p__Firmicutes	c__Negativicutes	o__Selenomonadales	f__Veillonellaceae	g__unclassified_f__Veillonellaceae			LLW_21	3.45753	0.0248987
p__Firmicutes	c__Clostridia	o__Clostridiales	f__Lachnospiraceae	g__[Ruminococcus]_gauvreauii_group			SLW_21	3.03899	0.00300638
p__Firmicutes	c__Clostridia	o__Clostridiales	f__Lachnospiraceae	g__Blautia			SLW_21	4.10351	0.0220848
p__Firmicutes	c__Erysipelotrichia	o__Erysipelotrichales	f__Erysipelotrichaceae	g__Catenibacterium			SLW_21	3.23969	0.00243218
p__Actinobacteria	c__Actinobacteria	o__Coriobacteriales	f__Coriobacteriaceae	g__Collinsella			SLW_21	3.42632	0.00432024
p__Firmicutes	c__Negativicutes	o__Selenomonadales	f__Veillonellaceae	g__Dialister			SLW_21	3.69262	0.00285768
p__Firmicutes	c__Clostridia	o__Clostridiales	f__Ruminococcaceae	g__Faecalibacterium			SLW_21	3.83685	0.007708
p__Proteobacteria	c__Epsilonproteobacteria	o__Campylobacterales	f__Helicobacteraceae	g__Helicobacter			SLW_21	3.58159	0.046413
p__Firmicutes	c__Negativicutes	o__Selenomonadales	f__Veillonellaceae	g__Megamonas			SLW_21	3.0695	0.0299792
p__Firmicutes	c__Clostridia	o__Clostridiales	f__Ruminococcaceae	g__norank_f__Ruminococcaceae			SLW_21	3.12012	0.00552302
p__Actinobacteria	c__Actinobacteria	o__Coriobacteriales	f__Coriobacteriaceae	g__Olsenella			SLW_21	2.75651	0.0108968
p__Firmicutes	c__Clostridia	o__Clostridiales	f__Lachnospiraceae	g__Oribacterium			SLW_21	2.78669	0.0166796
p__Firmicutes	c__Clostridia	o__Clostridiales	f__Ruminococcaceae	g__Ruminococcaceae_UCG-003			SLW_21	2.25075	0.0256218
p__Actinobacteria	c__Actinobacteria	o__Coriobacteriales	f__Coriobacteriaceae	g__Senegalimassilia			SLW_21	2.59154	0.0231312
p__Actinobacteria	c__Actinobacteria	o__Coriobacteriales	f__Coriobacteriaceae	g__Slackia			SLW_21	2.4382	0.0137674
p__Firmicutes	c__Clostridia	o__Clostridiales	f__Ruminococcaceae	g__Subdoligranulum			SLW_21	4.05351	0.00841468
p__Firmicutes	c__Clostridia	o__Clostridiales	f__Lachnospiraceae	g__unclassified_f__Lachnospiraceae			SLW_21	4.30207	0.0222143
p__Firmicutes	c__Clostridia	o__Clostridiales	f__Clostridiaceae_1	g__Clostridium_sensu_stricto_1	s__Clostridium_butyricum		ErHL_21	2.70522	0.0218665
p__Bacteroidetes	c__Bacteroidia	o__Bacteroidales	f__Bacteroidales_S24-7_group	g__norank_f__Bacteroidales_S24-7_group	s__gut_metagenome_g__norank_f__Bacteroidales_S24-7_group		ErHL_21	2.22583	0.00340743
p__Firmicutes	c__Clostridia	o__Clostridiales	f__Ruminococcaceae	g__Ruminiclostridium_6	s__gut_metagenome_g__Ruminiclostridium_6		ErHL_21	2.85321	0.014181
p__Bacteroidetes	c__Bacteroidia	o__Bacteroidales	f__Porphyromonadaceae	g__Parabacteroides	s__Porphyromonadaceae_bacterium_DJF_B175		ErHL_21	3.44192	0.0403354
p__Firmicutes	c__Erysipelotrichia	o__Erysipelotrichales	f__Erysipelotrichaceae	g__unclassified_f__Erysipelotrichaceae	s__unclassified_f__Erysipelotrichaceae		ErHL_21	2.48111	0.004574
p__Bacteroidetes	c__Bacteroidia	o__Bacteroidales	f__Prevotellaceae	g__unclassified_f__Prevotellaceae	s__unclassified_f__Prevotellaceae		ErHL_21	3.82287	0.00681722
p__Firmicutes	c__Clostridia	o__Clostridiales	f__Lachnospiraceae	g__[Eubacterium]_ruminantium_group	s__unclassified_g__[Eubacterium]_ruminantium_group		ErHL_21	2.4799	0.0495604
p__Tenericutes	c__Mollicutes	o__Anaeroplasmatales	f__Anaeroplasmataceae	g__Anaeroplasma	s__unclassified_g__Anaeroplasma		ErHL_21	2.25621	0.0345016
p__Bacteroidetes	c__Bacteroidia	o__Bacteroidales	f__Bacteroidaceae	g__Bacteroides	s__unclassified_g__Bacteroides		ErHL_21	3.2392	0.00220808
p__Firmicutes	c__Clostridia	o__Clostridiales	f__Lachnospiraceae	g__Butyrivibrio	s__unclassified_g__Butyrivibrio		ErHL_21	2.038	0.037782
p__Firmicutes	c__Clostridia	o__Clostridiales	f__Clostridiaceae_1	g__Clostridium_sensu_stricto_1	s__unclassified_g__Clostridium_sensu_stricto_1		ErHL_21	3.29484	0.0489212
p__Firmicutes	c__Clostridia	o__Clostridiales	f__Lachnospiraceae	g__Coprococcus_1	s__unclassified_g__Coprococcus_1		ErHL_21	3.21241	0.00205388
p__Fibrobacteres	c__Fibrobacteria	o__Fibrobacterales	f__Fibrobacteraceae	g__Fibrobacter	s__unclassified_g__Fibrobacter		ErHL_21	2.07773	0.00340743
p__Firmicutes	c__Clostridia	o__Clostridiales	f__Lachnospiraceae	g__Lachnospiraceae_UCG-003	s__unclassified_g__Lachnospiraceae_UCG-003		ErHL_21	2.76118	0.0143283
p__Verrucomicrobia	c__WCHB1-41	o__norank_c__WCHB1-41	f__norank_c__WCHB1-41	g__norank_c__WCHB1-41	s__unclassified_g__norank_c__WCHB1-41		ErHL_21	2.18006	0.0345016
p__Bacteroidetes	c__Bacteroidia	o__Bacteroidales	f__Bacteroidales_S24-7_group	g__norank_f__Bacteroidales_S24-7_group	s__unclassified_g__norank_f__Bacteroidales_S24-7_group		ErHL_21	4.63801	0.00189411
p__Firmicutes	c__Clostridia	o__Clostridiales	f__Clostridiales_vadinBB60_group	g__norank_f__Clostridiales_vadinBB60_group	s__unclassified_g__norank_f__Clostridiales_vadinBB60_group		ErHL_21	2.73105	0.00243564
p__Firmicutes	c__Clostridia	o__Clostridiales	f__Lachnospiraceae	g__norank_f__Lachnospiraceae	s__unclassified_g__norank_f__Lachnospiraceae		ErHL_21	2.33542	0.000314533
p__Cyanobacteria	c__Cyanobacteria	o__Gastranaerophilales	f__norank_o__Gastranaerophilales	g__norank_o__Gastranaerophilales	s__unclassified_g__norank_o__Gastranaerophilales		ErHL_21	2.33523	0.0488007
p__Bacteroidetes	c__Bacteroidia	o__Bacteroidales	f__Prevotellaceae	g__Prevotellaceae_UCG-003	s__unclassified_g__Prevotellaceae_UCG-003		ErHL_21	3.55993	0.00186311
p__Bacteroidetes	c__Bacteroidia	o__Bacteroidales	f__Rikenellaceae	g__Rikenellaceae_RC9_gut_group	s__unclassified_g__Rikenellaceae_RC9_gut_group		ErHL_21	3.05014	0.0294131
p__Firmicutes	c__Clostridia	o__Clostridiales	f__Ruminococcaceae	g__Ruminococcaceae_UCG-010	s__unclassified_g__Ruminococcaceae_UCG-010		ErHL_21	2.6341	0.0132781
p__Spirochaetae	c__Spirochaetes	o__Spirochaetales	f__Spirochaetaceae	g__Sphaerochaeta	s__unclassified_g__Sphaerochaeta		ErHL_21	2.16508	0.0262074
p__Spirochaetae	c__Spirochaetes	o__Spirochaetales	f__Spirochaetaceae	g__Treponema_2	s__unclassified_g__Treponema_2		ErHL_21	3.98103	0.00417128
p__Bacteroidetes	c__Bacteroidia	o__Bacteroidales	f__unclassified_o__Bacteroidales	g__unclassified_o__Bacteroidales	s__unclassified_o__Bacteroidales		ErHL_21	2.73717	0.0092255
p__Firmicutes	c__Clostridia	o__Clostridiales	f__unclassified_o__Clostridiales	g__unclassified_o__Clostridiales	s__unclassified_o__Clostridiales		ErHL_21	2.00998	0.00283982
p__Bacteroidetes	c__unclassified_p__Bacteroidetes	o__unclassified_p__Bacteroidetes	f__unclassified_p__Bacteroidetes	g__unclassified_p__Bacteroidetes	s__unclassified_p__Bacteroidetes		ErHL_21	2.55182	0.00217187
p__Firmicutes	c__Clostridia	o__Clostridiales	f__Family_XIII	g__[Eubacterium]_brachy_group	s__uncultured_bacterium_g__[Eubacterium]_brachy_group		ErHL_21	2.25422	0.0345016
p__Firmicutes	c__Clostridia	o__Clostridiales	f__Lachnospiraceae	g__[Eubacterium]_eligens_group	s__uncultured_bacterium_g__[Eubacterium]_eligens_group		ErHL_21	2.45417	0.0188591
p__Firmicutes	c__Clostridia	o__Clostridiales	f__Family_XIII	g__[Eubacterium]_nodatum_group	s__uncultured_bacterium_g__[Eubacterium]_nodatum_group		ErHL_21	2.44723	0.0179226
p__Firmicutes	c__Clostridia	o__Clostridiales	f__Lachnospiraceae	g__[Eubacterium]_xylanophilum_group	s__uncultured_bacterium_g__[Eubacterium]_xylanophilum_group		ErHL_21	2.06615	0.0206266
p__Verrucomicrobia	c__Verrucomicrobiae	o__Verrucomicrobiales	f__Verrucomicrobiaceae	g__Akkermansia	s__uncultured_bacterium_g__Akkermansia		ErHL_21	2.79179	0.000314533
p__Tenericutes	c__Mollicutes	o__Anaeroplasmatales	f__Anaeroplasmataceae	g__Anaeroplasma	s__uncultured_bacterium_g__Anaeroplasma		ErHL_21	2.78372	0.00142531
p__Bacteroidetes	c__Bacteroidia	o__Bacteroidales	f__Bacteroidaceae	g__Bacteroides	s__uncultured_bacterium_g__Bacteroides		ErHL_21	3.12828	0.00976082
p__Firmicutes	c__Clostridia	o__Clostridiales	f__Christensenellaceae	g__Christensenellaceae_R-7_group	s__uncultured_bacterium_g__Christensenellaceae_R-7_group		ErHL_21	2.52894	0.0342431
p__Firmicutes	c__Clostridia	o__Clostridiales	f__Lachnospiraceae	g__Lachnospiraceae_XPB1014_group	s__uncultured_bacterium_g__Lachnospiraceae_XPB1014_group		ErHL_21	2.70444	0.004574
p__Firmicutes	c__Clostridia	o__Clostridiales	f__Family_XIII	g__Mogibacterium	s__uncultured_bacterium_g__Mogibacterium		ErHL_21	2.44268	0.0133375
p__Verrucomicrobia	c__WCHB1-41	o__norank_c__WCHB1-41	f__norank_c__WCHB1-41	g__norank_c__WCHB1-41	s__uncultured_bacterium_g__norank_c__WCHB1-41		ErHL_21	2.00438	0.00807232
p__Bacteroidetes	c__Bacteroidia	o__Bacteroidales	f__Bacteroidales_RF16_group	g__norank_f__Bacteroidales_RF16_group	s__uncultured_bacterium_g__norank_f__Bacteroidales_RF16_group		ErHL_21	3.49799	0.00631118
p__Bacteroidetes	c__Bacteroidia	o__Bacteroidales	f__Bacteroidales_S24-7_group	g__norank_f__Bacteroidales_S24-7_group	s__uncultured_bacterium_g__norank_f__Bacteroidales_S24-7_group		ErHL_21	3.576	0.0156405
p__Firmicutes	c__Clostridia	o__Clostridiales	f__Clostridiales_vadinBB60_group	g__norank_f__Clostridiales_vadinBB60_group	s__uncultured_bacterium_g__norank_f__Clostridiales_vadinBB60_group		ErHL_21	2.57329	0.00429601
p__Firmicutes	c__Erysipelotrichia	o__Erysipelotrichales	f__Erysipelotrichaceae	g__norank_f__Erysipelotrichaceae	s__uncultured_bacterium_g__norank_f__Erysipelotrichaceae		ErHL_21	2.44041	0.00153001
p__Firmicutes	c__Clostridia	o__Clostridiales	f__Ruminococcaceae	g__Oscillibacter	s__uncultured_bacterium_g__Oscillibacter		ErHL_21	2.21356	0.0177644
p__Bacteroidetes	c__Bacteroidia	o__Bacteroidales	f__Porphyromonadaceae	g__Parabacteroides	s__uncultured_bacterium_g__Parabacteroides		ErHL_21	2.79992	0.0215203
p__Bacteroidetes	c__Bacteroidia	o__Bacteroidales	f__Prevotellaceae	g__Prevotella_1	s__uncultured_bacterium_g__Prevotella_1		ErHL_21	3.71681	0.0025523
p__Bacteroidetes	c__Bacteroidia	o__Bacteroidales	f__Prevotellaceae	g__Prevotellaceae_UCG-003	s__uncultured_bacterium_g__Prevotellaceae_UCG-003		ErHL_21	3.3577	0.00606474
p__Bacteroidetes	c__Bacteroidia	o__Bacteroidales	f__Prevotellaceae	g__Prevotellaceae_UCG-004	s__uncultured_bacterium_g__Prevotellaceae_UCG-004		ErHL_21	2.04912	0.0361533
p__Firmicutes	c__Negativicutes	o__Selenomonadales	f__Veillonellaceae	g__Quinella	s__uncultured_bacterium_g__Quinella		ErHL_21	2.87701	0.0287286
p__Bacteroidetes	c__Bacteroidia	o__Bacteroidales	f__Rikenellaceae	g__Rikenellaceae_RC9_gut_group	s__uncultured_bacterium_g__Rikenellaceae_RC9_gut_group		ErHL_21	3.54054	0.0489212
p__Firmicutes	c__Clostridia	o__Clostridiales	f__Ruminococcaceae	g__Ruminiclostridium_6	s__uncultured_bacterium_g__Ruminiclostridium_6		ErHL_21	3.03341	0.00227997
p__Firmicutes	c__Clostridia	o__Clostridiales	f__Ruminococcaceae	g__Ruminococcaceae_NK4A214_group	s__uncultured_bacterium_g__Ruminococcaceae_NK4A214_group		ErHL_21	2.02007	0.00153001
p__Firmicutes	c__Clostridia	o__Clostridiales	f__Ruminococcaceae	g__Ruminococcaceae_UCG-001	s__uncultured_bacterium_g__Ruminococcaceae_UCG-001		ErHL_21	3.07619	0.00435243
p__Firmicutes	c__Clostridia	o__Clostridiales	f__Ruminococcaceae	g__Ruminococcaceae_UCG-010	s__uncultured_bacterium_g__Ruminococcaceae_UCG-010		ErHL_21	2.78871	0.0380442
p__Spirochaetae	c__Spirochaetes	o__Spirochaetales	f__Spirochaetaceae	g__Sphaerochaeta	s__uncultured_bacterium_g__Sphaerochaeta		ErHL_21	3.29344	0.0115394
p__Spirochaetae	c__Spirochaetes	o__Spirochaetales	f__Spirochaetaceae	g__Treponema_2	s__uncultured_bacterium_g__Treponema_2		ErHL_21	4.43877	0.00188188
p__Bacteroidetes	c__Bacteroidia	o__Bacteroidales	f__Prevotellaceae	g__Prevotellaceae_UCG-001	s__uncultured_Bacteroidales_bacterium_g__Prevotellaceae_UCG-001		ErHL_21	2.22116	0.0476403
p__Bacteroidetes	c__Bacteroidia	o__Bacteroidales	f__Rikenellaceae	g__Rikenellaceae_RC9_gut_group	s__uncultured_Bacteroidales_bacterium_g__Rikenellaceae_RC9_gut_group		ErHL_21	3.10372	0.0113279
p__Firmicutes	c__Clostridia	o__Clostridiales	f__Lachnospiraceae	g__Cellulosilyticum	s__uncultured_Cellulosilyticum_sp__g__Cellulosilyticum		ErHL_21	2.11977	0.000314533
p__Firmicutes	c__Clostridia	o__Clostridiales	f__Ruminococcaceae	g__Ruminococcus_1	s__uncultured_Firmicutes_bacterium_g__Ruminococcus_1		ErHL_21	3.00532	0.0397921
p__Firmicutes	c__Clostridia	o__Clostridiales	f__Ruminococcaceae	g__Butyricicoccus	s__uncultured_organism_g__Butyricicoccus		ErHL_21	2.14265	0.0403229
p__Firmicutes	c__Clostridia	o__Clostridiales	f__Ruminococcaceae	g__Ruminiclostridium_1	s__uncultured_organism_g__Ruminiclostridium_1		ErHL_21	2.072	0.0345016
p__Firmicutes	c__Clostridia	o__Clostridiales	f__Ruminococcaceae	g__Ruminococcaceae_UCG-005	s__uncultured_prokaryote_g__Ruminococcaceae_UCG-005		ErHL_21	2.74063	0.0136915
p__Spirochaetae	c__Spirochaetes	o__Spirochaetales	f__Spirochaetaceae	g__Sphaerochaeta	s__uncultured_prokaryote_g__Sphaerochaeta		ErHL_21	2.73307	0.00409346
p__Firmicutes	c__Clostridia	o__Clostridiales	f__Clostridiales_vadinBB60_group	g__norank_f__Clostridiales_vadinBB60_group	s__uncultured_rumen_bacterium_4C28d-15		ErHL_21	2.00141	0.00179578
p__Tenericutes	c__Mollicutes	o__Anaeroplasmatales	f__Anaeroplasmataceae	g__Anaeroplasma	s__uncultured_rumen_bacterium_g__Anaeroplasma		ErHL_21	2.83028	0.00148205
p__Bacteroidetes	c__Bacteroidia	o__Bacteroidales	f__Bacteroidales_RF16_group	g__norank_f__Bacteroidales_RF16_group	s__uncultured_rumen_bacterium_g__norank_f__Bacteroidales_RF16_group		ErHL_21	2.62051	0.0427554
p__Firmicutes	c__Erysipelotrichia	o__Erysipelotrichales	f__Erysipelotrichaceae	g__norank_f__Erysipelotrichaceae	s__uncultured_rumen_bacterium_g__norank_f__Erysipelotrichaceae		ErHL_21	2.10138	0.024017
p__Firmicutes	c__Clostridia	o__Clostridiales	f__Ruminococcaceae	g__Ruminococcaceae_NK4A214_group	s__uncultured_rumen_bacterium_g__Ruminococcaceae_NK4A214_group		ErHL_21	2.97071	0.0118425
p__Proteobacteria	c__Betaproteobacteria	o__Burkholderiales	f__Alcaligenaceae	g__Sutterella	s__uncultured_rumen_bacterium_g__Sutterella		ErHL_21	2.22961	0.00854298
p__Firmicutes	c__Clostridia	o__Clostridiales	f__Clostridiales_vadinBB60_group	g__norank_f__Clostridiales_vadinBB60_group	s__uncultured_Thermoanaerobacterales_bacterium_g__norank_f__Clostridiales_vadinBB60_group		ErHL_21	2.53441	0.00778418
p__Bacteroidetes	c__Bacteroidia	o__Bacteroidales	f__Rikenellaceae	g__Rikenellaceae_RC9_gut_group	s__wallaby_gut_metagenome_g__Rikenellaceae_RC9_gut_group		ErHL_21	2.63236	0.000598014
p__Firmicutes	c__Negativicutes	o__Selenomonadales	f__Acidaminococcaceae	g__Acidaminococcus	s__Acidaminococcus_fermentans_DSM_20731		LLW_21	2.21448	0.0212543
p__Actinobacteria	c__Actinobacteria	o__Corynebacteriales	f__Corynebacteriaceae	g__Corynebacterium_1	s__Corynebacterium_variabile_g__Corynebacterium_1		LLW_21	2.48537	0.00778418
p__Firmicutes	c__Clostridia	o__Clostridiales	f__Lachnospiraceae	g__Dorea	s__Dorea_longicatena_g__Dorea		LLW_21	3.49808	0.00572025
p__Firmicutes	c__Erysipelotrichia	o__Erysipelotrichales	f__Erysipelotrichaceae	g__Erysipelotrichaceae_UCG-004	s__gut_metagenome_g__Erysipelotrichaceae_UCG-004		LLW_21	2.76947	0.0345016
p__Actinobacteria	c__Actinobacteria	o__Coriobacteriales	f__Coriobacteriaceae	g__norank_f__Coriobacteriaceae	s__human_gut_metagenome_g__norank		LLW_21	2.24199	0.0109357
p__Firmicutes	c__Negativicutes	o__Selenomonadales	f__Veillonellaceae	g__Megasphaera	s__Megasphaera_elsdenii_DSM_20460		LLW_21	3.77074	0.00294429
p__Actinobacteria	c__Actinobacteria	o__Coriobacteriales	f__Coriobacteriaceae	g__Enterorhabdus	s__metagenome_g__Enterorhabdus		LLW_21	2.19116	0.0127522
p__Firmicutes	c__Negativicutes	o__Selenomonadales	f__Veillonellaceae	g__Mitsuokella	s__Mitsuokella_jalaludinii		LLW_21	2.87645	0.0191929
p__Proteobacteria	c__Betaproteobacteria	o__Burkholderiales	f__Alcaligenaceae	g__Sutterella	s__Parasutterella_secunda		LLW_21	2.44376	0.0084472
p__Firmicutes	c__Negativicutes	o__Selenomonadales	f__Veillonellaceae	g__Selenomonas	s__Selenomonas_bovis		LLW_21	3.52272	0.0160583
p__Firmicutes	c__Negativicutes	o__Selenomonadales	f__Veillonellaceae	g__unclassified_f__Veillonellaceae	s__unclassified_f__Veillonellaceae		LLW_21	3.45751	0.0248987
p__Firmicutes	c__Clostridia	o__Clostridiales	f__Lachnospiraceae	g__[Eubacterium]_hallii_group	s__unclassified_g__[Eubacterium]_hallii_group		LLW_21	2.91143	0.0109478
p__Firmicutes	c__Clostridia	o__Clostridiales	f__Lachnospiraceae	g__Blautia	s__unclassified_g__Blautia		LLW_21	3.51746	0.0403354
p__Firmicutes	c__Clostridia	o__Clostridiales	f__Ruminococcaceae	g__Butyricicoccus	s__unclassified_g__Butyricicoccus		LLW_21	3.15443	0.017581
p__Firmicutes	c__Clostridia	o__Clostridiales	f__Lachnospiraceae	g__Fusicatenibacter	s__unclassified_g__Fusicatenibacter		LLW_21	2.78599	0.00766935
p__Firmicutes	c__Clostridia	o__Clostridiales	f__Lachnospiraceae	g__Lachnospiraceae_NK3A20_group	s__unclassified_g__Lachnospiraceae_NK3A20_group		LLW_21	2.40686	0.00554443
p__Actinobacteria	c__Actinobacteria	o__Coriobacteriales	f__Coriobacteriaceae	g__norank_f__Coriobacteriaceae	s__unclassified_g__norank_f__Coriobacteriaceae		LLW_21	2.40971	0.0294131
p__Firmicutes	c__Negativicutes	o__Selenomonadales	f__Veillonellaceae	g__norank_f__Veillonellaceae	s__unclassified_g__norank_f__Veillonellaceae		LLW_21	3.17881	0.0196183
p__Firmicutes	c__Negativicutes	o__Selenomonadales	f__Acidaminococcaceae	g__Phascolarctobacterium	s__unclassified_g__Phascolarctobacterium		LLW_21	3.84027	0.0453399
p__Bacteroidetes	c__Bacteroidia	o__Bacteroidales	f__Prevotellaceae	g__Prevotella_7	s__unclassified_g__Prevotella_7		LLW_21	3.57448	0.00249295
p__Firmicutes	c__Clostridia	o__Clostridiales	f__Ruminococcaceae	g__Ruminiclostridium_5	s__unclassified_g__Ruminiclostridium_5		LLW_21	2.25812	0.0319225
p__Firmicutes	c__Bacilli	o__Bacillales	f__Staphylococcaceae	g__Staphylococcus	s__unclassified_g__Staphylococcus		LLW_21	2.0011	0.0133001
p__Firmicutes	c__Negativicutes	o__Selenomonadales	f__Veillonellaceae	g__Allisonella	s__uncultured_bacterium_g__Allisonella		LLW_21	2.27753	0.0227213
p__Firmicutes	c__Erysipelotrichia	o__Erysipelotrichales	f__Erysipelotrichaceae	g__Asteroleplasma	s__uncultured_bacterium_g__Asteroleplasma		LLW_21	2.89342	0.00269204
p__Bacteroidetes	c__Bacteroidia	o__Bacteroidales	f__norank_o__Bacteroidales	g__norank_o__Bacteroidales	s__uncultured_bacterium_g__norank_o__Bacteroidales		LLW_21	2.14365	0.00521077
p__Cyanobacteria	c__Cyanobacteria	o__Gastranaerophilales	f__norank_o__Gastranaerophilales	g__norank_o__Gastranaerophilales	s__uncultured_bacterium_g__norank_o__Gastranaerophilales		LLW_21	2.72144	0.046413
p__Firmicutes	c__Clostridia	o__Clostridiales	f__Peptococcaceae	g__Peptococcus	s__uncultured_bacterium_g__Peptococcus		LLW_21	3.0293	0.0497871
p__Bacteroidetes	c__Bacteroidia	o__Bacteroidales	f__Prevotellaceae	g__Prevotella_7	s__uncultured_bacterium_g__Prevotella_7		LLW_21	3.39686	0.00627722
p__Firmicutes	c__Clostridia	o__Clostridiales	f__Ruminococcaceae	g__Ruminococcaceae_UCG-008	s__uncultured_bacterium_g__Ruminococcaceae_UCG-008		LLW_21	3.74745	0.00322494
p__Firmicutes	c__Clostridia	o__Clostridiales	f__Lachnospiraceae	g__Shuttleworthia	s__uncultured_bacterium_g__Shuttleworthia		LLW_21	2.50816	0.0440277
p__Firmicutes	c__Clostridia	o__Clostridiales	f__Lachnospiraceae	g__Roseburia	s__uncultured_Lachnospiraceae_bacterium_g__Roseburia		LLW_21	3.28886	0.00285768
p__Firmicutes	c__Clostridia	o__Clostridiales	f__Clostridiales_vadinBB60_group	g__norank_f__Clostridiales_vadinBB60_group	s__uncultured_rumen_bacterium_g__norank_f__Clostridiales_vadinBB60_group		LLW_21	2.60597	0.00854298
p__Firmicutes	c__Negativicutes	o__Selenomonadales	f__Veillonellaceae	g__norank_f__Veillonellaceae	s__Veillonellaceae_bacterium_DJF_CR19		LLW_21	3.54512	0.00481622
p__Bacteroidetes	c__Bacteroidia	o__Bacteroidales	f__Bacteroidaceae	g__Bacteroides	s__Bacteroidaceae_bacterium_DJF_B220		SLW_21	2.70331	0.0373432
p__Proteobacteria	c__Epsilonproteobacteria	o__Campylobacterales	f__Campylobacteraceae	g__Campylobacter	s__Campylobacter_jejuni_subsp__jejuni		SLW_21	3.24787	0.0155548
p__Firmicutes	c__Clostridia	o__Clostridiales	f__Lachnospiraceae	g__Dorea	s__Dorea_formicigenerans_ATCC_27755		SLW_21	3.33146	0.00200866
p__Firmicutes	c__Clostridia	o__Clostridiales	f__Ruminococcaceae	g__[Eubacterium]_coprostanoligenes_group	s__Eubacterium_coprostanoligenes		SLW_21	3.72017	0.00861383
p__Firmicutes	c__Clostridia	o__Clostridiales	f__Lachnospiraceae	g__Blautia	s__Ruminococcus_sp__5_1_39BFAA		SLW_21	3.97624	0.00951419
p__Actinobacteria	c__Actinobacteria	o__Coriobacteriales	f__Coriobacteriaceae	g__Slackia	s__Slackia_isoflavoniconvertens		SLW_21	2.43736	0.00483677
p__Spirochaetae	c__Spirochaetes	o__Spirochaetales	f__Spirochaetaceae	g__Treponema_2	s__Treponema_succinifaciens_DSM_2489		SLW_21	2.36611	0.0381154
p__Firmicutes	c__Clostridia	o__Clostridiales	f__Lachnospiraceae	g__unclassified_f__Lachnospiraceae	s__unclassified_f__Lachnospiraceae		SLW_21	4.30207	0.0222143
p__Firmicutes	c__Clostridia	o__Clostridiales	f__Family_XIII	g__[Eubacterium]_brachy_group	s__unclassified_g__[Eubacterium]_brachy_group		SLW_21	2.81253	0.0237402
p__Firmicutes	c__Clostridia	o__Clostridiales	f__Lachnospiraceae	g__[Ruminococcus]_gauvreauii_group	s__unclassified_g__[Ruminococcus]_gauvreauii_group		SLW_21	3.03899	0.00300638
p__Actinobacteria	c__Actinobacteria	o__Coriobacteriales	f__Coriobacteriaceae	g__Collinsella	s__unclassified_g__Collinsella		SLW_21	2.20645	0.0199128
p__Firmicutes	c__Clostridia	o__Clostridiales	f__Ruminococcaceae	g__Faecalibacterium	s__unclassified_g__Faecalibacterium		SLW_21	3.83685	0.007708
p__Proteobacteria	c__Epsilonproteobacteria	o__Campylobacterales	f__Helicobacteraceae	g__Helicobacter	s__unclassified_g__Helicobacter		SLW_21	3.58159	0.046413
p__Firmicutes	c__Negativicutes	o__Selenomonadales	f__Veillonellaceae	g__Megamonas	s__unclassified_g__Megamonas		SLW_21	3.0695	0.0299792
p__Firmicutes	c__Negativicutes	o__Selenomonadales	f__Veillonellaceae	g__Megasphaera	s__unclassified_g__Megasphaera		SLW_21	2.91267	0.00273046
p__Firmicutes	c__Clostridia	o__Clostridiales	f__Family_XIII	g__Mogibacterium	s__unclassified_g__Mogibacterium		SLW_21	2.61469	0.0199142
p__Firmicutes	c__Clostridia	o__Clostridiales	f__Ruminococcaceae	g__norank_f__Ruminococcaceae	s__unclassified_g__norank_f__Ruminococcaceae		SLW_21	2.74659	0.00362507
p__Actinobacteria	c__Actinobacteria	o__Coriobacteriales	f__Coriobacteriaceae	g__Olsenella	s__unclassified_g__Olsenella		SLW_21	2.73886	0.0108968
p__Firmicutes	c__Clostridia	o__Clostridiales	f__Ruminococcaceae	g__Ruminococcaceae_UCG-003	s__unclassified_g__Ruminococcaceae_UCG-003		SLW_21	2.25075	0.0256218
p__Firmicutes	c__Clostridia	o__Clostridiales	f__Lachnospiraceae	g__[Eubacterium]_ruminantium_group	s__uncultured_bacterium_g__[Eubacterium]_ruminantium_group		SLW_21	2.68798	0.00554443
p__Firmicutes	c__Negativicutes	o__Selenomonadales	f__Veillonellaceae	g__Anaerovibrio	s__uncultured_bacterium_g__Anaerovibrio		SLW_21	4.29972	0.014752
p__Firmicutes	c__Clostridia	o__Clostridiales	f__Lachnospiraceae	g__Blautia	s__uncultured_bacterium_g__Blautia		SLW_21	2.5448	0.00589322
p__Firmicutes	c__Erysipelotrichia	o__Erysipelotrichales	f__Erysipelotrichaceae	g__Catenibacterium	s__uncultured_bacterium_g__Catenibacterium		SLW_21	3.23967	0.00243218
p__Actinobacteria	c__Actinobacteria	o__Coriobacteriales	f__Coriobacteriaceae	g__Collinsella	s__uncultured_bacterium_g__Collinsella		SLW_21	3.41542	0.00432024
p__Firmicutes	c__Negativicutes	o__Selenomonadales	f__Veillonellaceae	g__Dialister	s__uncultured_bacterium_g__Dialister		SLW_21	3.69261	0.00285768
p__Actinobacteria	c__Actinobacteria	o__Coriobacteriales	f__Coriobacteriaceae	g__Enterorhabdus	s__uncultured_bacterium_g__Enterorhabdus		SLW_21	2.29288	0.0227213
p__Firmicutes	c__Erysipelotrichia	o__Erysipelotrichales	f__Erysipelotrichaceae	g__Erysipelotrichaceae_UCG-006	s__uncultured_bacterium_g__Erysipelotrichaceae_UCG-006		SLW_21	2.33742	0.00910957
p__Firmicutes	c__Clostridia	o__Clostridiales	f__Lachnospiraceae	g__Oribacterium	s__uncultured_bacterium_g__Oribacterium		SLW_21	2.7789	0.0144955
p__Actinobacteria	c__Actinobacteria	o__Coriobacteriales	f__Coriobacteriaceae	g__Senegalimassilia	s__uncultured_bacterium_g__Senegalimassilia		SLW_21	2.59227	0.0231312
p__Firmicutes	c__Erysipelotrichia	o__Erysipelotrichales	f__Erysipelotrichaceae	g__Solobacterium	s__uncultured_bacterium_g__Solobacterium		SLW_21	3.26877	0.00205771
p__Firmicutes	c__Clostridia	o__Clostridiales	f__Ruminococcaceae	g__Subdoligranulum	s__uncultured_bacterium_g__Subdoligranulum		SLW_21	4.06088	0.00362507
p__Firmicutes	c__Clostridia	o__Clostridiales	f__Ruminococcaceae	g__Ruminococcaceae_UCG-005	s__uncultured_Clostridiales_bacterium_g__Ruminococcaceae_UCG-005		SLW_21	3.08143	0.00977743
p__Bacteroidetes	c__Bacteroidia	o__Bacteroidales	f__Prevotellaceae	g__Alloprevotella	s__uncultured_organism_g__Alloprevotella		SLW_21	2.83584	0.039916
p__Proteobacteria	c__Deltaproteobacteria	o__Desulfovibrionales	f__Desulfovibrionaceae	g__Desulfovibrio	s__uncultured_rumen_bacterium_g__Desulfovibrio	OTU10	ErHL_21	2.15268	0.00407532
p__Cyanobacteria	c__Cyanobacteria	o__Gastranaerophilales	f__norank_o__Gastranaerophilales	g__norank_o__Gastranaerophilales	s__uncultured_bacterium_g__norank_o__Gastranaerophilales	OTU1000	ErHL_21	2.30056	0.0216911
p__Firmicutes	c__Clostridia	o__Clostridiales	f__Lachnospiraceae	g__unclassified_f__Lachnospiraceae	s__unclassified_f__Lachnospiraceae	OTU1004	ErHL_21	2.34217	0.0345016
p__Bacteroidetes	c__Bacteroidia	o__Bacteroidales	f__Prevotellaceae	g__Alloprevotella	s__unclassified_g__Alloprevotella	OTU1008	ErHL_21	2.34972	0.0345016
p__Firmicutes	c__Clostridia	o__Clostridiales	f__Ruminococcaceae	g__Anaerotruncus	s__uncultured_bacterium_g__Anaerotruncus	OTU1019	ErHL_21	2.11386	0.0252011
p__Firmicutes	c__Clostridia	o__Clostridiales	f__Christensenellaceae	g__Christensenellaceae_R-7_group	s__uncultured_prokaryote_g__Christensenellaceae_R-7_group	OTU1023	ErHL_21	3.01037	0.0394028
p__Tenericutes	c__Mollicutes	o__Anaeroplasmatales	f__Anaeroplasmataceae	g__Anaeroplasma	s__uncultured_rumen_bacterium_g__Anaeroplasma	OTU1028	ErHL_21	2.69302	0.0010568
p__Cyanobacteria	c__Cyanobacteria	o__Gastranaerophilales	f__norank_o__Gastranaerophilales	g__norank_o__Gastranaerophilales	s__unclassified_g__norank_o__Gastranaerophilales	OTU1033	ErHL_21	2.34587	0.0488007
p__Bacteroidetes	c__Bacteroidia	o__Bacteroidales	f__Prevotellaceae	g__unclassified_f__Prevotellaceae	s__unclassified_f__Prevotellaceae	OTU1036	ErHL_21	2.0308	0.0104937
p__Tenericutes	c__Mollicutes	o__Mollicutes_RF9	f__norank_o__Mollicutes_RF9	g__norank_o__Mollicutes_RF9	s__uncultured_bacterium_g__norank_o__Mollicutes_RF9	OTU1038	ErHL_21	2.01596	0.0157087
p__Firmicutes	c__Clostridia	o__Clostridiales	f__Lachnospiraceae	g__unclassified_f__Lachnospiraceae	s__unclassified_f__Lachnospiraceae	OTU1044	ErHL_21	2.2442	0.0278413
p__Bacteroidetes	c__Bacteroidia	o__Bacteroidales	f__Prevotellaceae	g__Prevotellaceae_NK3B31_group	s__uncultured_bacterium_g__Prevotellaceae_NK3B31_group	OTU1045	ErHL_21	3.29449	0.0260139
p__Firmicutes	c__Clostridia	o__Clostridiales	f__Lachnospiraceae	g__unclassified_f__Lachnospiraceae	s__unclassified_f__Lachnospiraceae	OTU1105	ErHL_21	2.01596	0.0345016
p__Proteobacteria	c__Alphaproteobacteria	o__Rhodospirillales	f__Rhodospirillaceae	g__norank_f__Rhodospirillaceae	s__gut_metagenome_g__norank_f__Rhodospirillaceae	OTU1106	ErHL_21	2.03083	0.00854298
p__Firmicutes	c__Clostridia	o__Clostridiales	f__Ruminococcaceae	g__[Eubacterium]_coprostanoligenes_group	s__unclassified_g__[Eubacterium]_coprostanoligenes_group	OTU1108	ErHL_21	2.23717	0.0021394
p__Bacteroidetes	c__Bacteroidia	o__Bacteroidales	f__Bacteroidales_RF16_group	g__norank_f__Bacteroidales_RF16_group	s__uncultured_bacterium_g__norank_f__Bacteroidales_RF16_group	OTU1114	ErHL_21	3.411	0.00603759
p__Bacteroidetes	c__Bacteroidia	o__Bacteroidales	f__Bacteroidaceae	g__Bacteroides	s__unclassified_g__Bacteroides	OTU113	ErHL_21	2.00684	0.0345016
p__Firmicutes	c__Negativicutes	o__Selenomonadales	f__Veillonellaceae	g__Quinella	s__uncultured_bacterium_g__Quinella	OTU115	ErHL_21	2.87708	0.0287286
p__Bacteroidetes	c__Bacteroidia	o__Bacteroidales	f__Prevotellaceae	g__Prevotellaceae_UCG-003	s__unclassified_g__Prevotellaceae_UCG-003	OTU1169	ErHL_21	2.50164	0.00448962
p__Firmicutes	c__Clostridia	o__Clostridiales	f__Ruminococcaceae	g__unclassified_f__Ruminococcaceae	s__unclassified_f__Ruminococcaceae	OTU117	ErHL_21	2.03718	0.00179578
p__Firmicutes	c__Clostridia	o__Clostridiales	f__Ruminococcaceae	g__Butyricicoccus	s__uncultured_organism_g__Butyricicoccus	OTU1173	ErHL_21	2.14276	0.0403229
p__Bacteroidetes	c__Bacteroidia	o__Bacteroidales	f__Prevotellaceae	g__Alloprevotella	s__uncultured_bacterium_g__Alloprevotella	OTU1177	ErHL_21	2.22392	0.0419366
p__Firmicutes	c__Clostridia	o__Clostridiales	f__Ruminococcaceae	g__[Eubacterium]_coprostanoligenes_group	s__uncultured_bacterium_g__[Eubacterium]_coprostanoligenes_group	OTU118	ErHL_21	2.08591	0.00567924
p__Firmicutes	c__Clostridia	o__Clostridiales	f__Family_XIII	g__[Eubacterium]_nodatum_group	s__uncultured_bacterium_g__[Eubacterium]_nodatum_group	OTU1232	ErHL_21	2.44723	0.0179226
p__Firmicutes	c__Clostridia	o__Clostridiales	f__Clostridiales_vadinBB60_group	g__norank_f__Clostridiales_vadinBB60_group	s__uncultured_bacterium_g__norank_f__Clostridiales_vadinBB60_group	OTU1248	ErHL_21	2.33034	0.0304836
p__Firmicutes	c__Erysipelotrichia	o__Erysipelotrichales	f__Erysipelotrichaceae	g__Erysipelotrichaceae_UCG-004	s__uncultured_bacterium_g__Erysipelotrichaceae_UCG-004	OTU1249	ErHL_21	2.40637	0.00114401
p__Firmicutes	c__Clostridia	o__Clostridiales	f__Ruminococcaceae	g__Ruminococcaceae_UCG-014	s__unclassified_g__Ruminococcaceae_UCG-014	OTU1251	ErHL_21	2.05667	0.0344852
p__Tenericutes	c__Mollicutes	o__Mollicutes_RF9	f__norank_o__Mollicutes_RF9	g__norank_o__Mollicutes_RF9	s__gut_metagenome_g__norank_o__Mollicutes_RF9	OTU1256	ErHL_21	2.33206	0.0104937
p__Bacteroidetes	c__Bacteroidia	o__Bacteroidales	f__Bacteroidales_RF16_group	g__norank_f__Bacteroidales_RF16_group	s__uncultured_rumen_bacterium_g__norank_f__Bacteroidales_RF16_group	OTU127	ErHL_21	2.60521	0.0427554
p__Firmicutes	c__Erysipelotrichia	o__Erysipelotrichales	f__Erysipelotrichaceae	g__Erysipelotrichaceae_UCG-004	s__uncultured_bacterium_g__Erysipelotrichaceae_UCG-004	OTU1298	ErHL_21	2.14312	0.0145805
p__Bacteroidetes	c__Bacteroidia	o__Bacteroidales	f__Prevotellaceae	g__unclassified_f__Prevotellaceae	s__unclassified_f__Prevotellaceae	OTU1339	ErHL_21	2.24948	0.0162911
p__Firmicutes	c__Clostridia	o__Clostridiales	f__Ruminococcaceae	g__[Eubacterium]_coprostanoligenes_group	s__uncultured_bacterium_g__[Eubacterium]_coprostanoligenes_group	OTU1347	ErHL_21	2.27805	0.0384058
p__Bacteroidetes	c__Bacteroidia	o__Bacteroidales	f__Bacteroidaceae	g__Bacteroides	s__unclassified_g__Bacteroides	OTU1349	ErHL_21	2.71328	0.000821419
p__Verrucomicrobia	c__WCHB1-41	o__norank_c__WCHB1-41	f__norank_c__WCHB1-41	g__norank_c__WCHB1-41	s__unclassified_g__norank_c__WCHB1-41	OTU1353	ErHL_21	2.18746	0.0345016
p__Bacteroidetes	c__Bacteroidia	o__Bacteroidales	f__Prevotellaceae	g__Prevotellaceae_UCG-001	s__uncultured_bacterium_g__Prevotellaceae_UCG-001	OTU1357	ErHL_21	2.86591	0.0311184
p__Bacteroidetes	c__Bacteroidia	o__Bacteroidales	f__Bacteroidales_S24-7_group	g__norank_f__Bacteroidales_S24-7_group	s__uncultured_bacterium_g__norank_f__Bacteroidales_S24-7_group	OTU136	ErHL_21	2.27843	0.0216911
p__Firmicutes	c__Clostridia	o__Clostridiales	f__Lachnospiraceae	g__Acetitomaculum	s__uncultured_bacterium_g__Acetitomaculum	OTU138	ErHL_21	2.10191	0.0391498
p__Bacteroidetes	c__Bacteroidia	o__Bacteroidales	f__Bacteroidales_S24-7_group	g__norank_f__Bacteroidales_S24-7_group	s__uncultured_bacterium_g__norank_f__Bacteroidales_S24-7_group	OTU139	ErHL_21	2.59694	0.0283134
p__Firmicutes	c__Clostridia	o__Clostridiales	f__Ruminococcaceae	g__Oscillibacter	s__unclassified_g__Oscillibacter	OTU14	ErHL_21	2.16971	0.0241096
p__Firmicutes	c__Clostridia	o__Clostridiales	f__Family_XIII	g__[Eubacterium]_brachy_group	s__uncultured_bacterium_g__[Eubacterium]_brachy_group	OTU148	ErHL_21	2.26611	0.0345016
p__Firmicutes	c__Clostridia	o__Clostridiales	f__Clostridiaceae_1	g__Clostridium_sensu_stricto_1	s__unclassified_g__Clostridium_sensu_stricto_1	OTU150	ErHL_21	3.28778	0.0380442
p__Bacteroidetes	c__Bacteroidia	o__Bacteroidales	f__Bacteroidales_S24-7_group	g__norank_f__Bacteroidales_S24-7_group	s__gut_metagenome_g__norank_f__Bacteroidales_S24-7_group	OTU152	ErHL_21	2.22533	0.00340743
p__Bacteroidetes	c__Bacteroidia	o__Bacteroidales	f__Bacteroidales_S24-7_group	g__norank_f__Bacteroidales_S24-7_group	s__unclassified_g__norank_f__Bacteroidales_S24-7_group	OTU160	ErHL_21	4.63795	0.000821419
p__Firmicutes	c__Clostridia	o__Clostridiales	f__Ruminococcaceae	g__Ruminococcus_2	s__unclassified_g__Ruminococcus_2	OTU166	ErHL_21	2.88349	0.00174084
p__Bacteroidetes	c__Bacteroidia	o__Bacteroidales	f__Prevotellaceae	g__Prevotellaceae_UCG-003	s__unclassified_g__Prevotellaceae_UCG-003	OTU169	ErHL_21	3.35678	0.000314533
p__Firmicutes	c__Clostridia	o__Clostridiales	f__Ruminococcaceae	g__Ruminococcus_1	s__uncultured_Firmicutes_bacterium_g__Ruminococcus_1	OTU176	ErHL_21	2.68978	0.00700335
p__Firmicutes	c__Clostridia	o__Clostridiales	f__Lachnospiraceae	g__Coprococcus_1	s__unclassified_g__Coprococcus_1	OTU177	ErHL_21	3.1617	0.00205388
p__Bacteroidetes	c__Bacteroidia	o__Bacteroidales	f__Prevotellaceae	g__Alloprevotella	s__uncultured_bacterium_g__Alloprevotella	OTU18	ErHL_21	2.71127	0.0103831
p__Firmicutes	c__Clostridia	o__Clostridiales	f__Ruminococcaceae	g__Ruminococcaceae_UCG-001	s__uncultured_bacterium_g__Ruminococcaceae_UCG-001	OTU185	ErHL_21	3.07588	0.00435243
p__Firmicutes	c__Clostridia	o__Clostridiales	f__Lachnospiraceae	g__Marvinbryantia	s__uncultured_bacterium_g__Marvinbryantia	OTU188	ErHL_21	3.76106	0.00995416
p__Bacteroidetes	c__Bacteroidia	o__Bacteroidales	f__Rikenellaceae	g__Rikenellaceae_RC9_gut_group	s__uncultured_bacterium_g__Rikenellaceae_RC9_gut_group	OTU195	ErHL_21	2.34655	0.0456606
p__Bacteroidetes	c__Bacteroidia	o__Bacteroidales	f__Bacteroidaceae	g__Bacteroides	s__unclassified_g__Bacteroides	OTU203	ErHL_21	2.07054	0.00179578
p__Tenericutes	c__Mollicutes	o__Anaeroplasmatales	f__Anaeroplasmataceae	g__Anaeroplasma	s__uncultured_bacterium_g__Anaeroplasma	OTU204	ErHL_21	2.73617	0.00136797
p__Bacteroidetes	c__Bacteroidia	o__Bacteroidales	f__Bacteroidales_S24-7_group	g__norank_f__Bacteroidales_S24-7_group	s__uncultured_bacterium_g__norank_f__Bacteroidales_S24-7_group	OTU205	ErHL_21	2.82425	0.00540527
p__Bacteroidetes	c__Bacteroidia	o__Bacteroidales	f__Prevotellaceae	g__Alloprevotella	s__unclassified_g__Alloprevotella	OTU206	ErHL_21	3.00476	0.0385877
p__Bacteroidetes	c__Bacteroidia	o__Bacteroidales	f__Prevotellaceae	g__Prevotellaceae_UCG-003	s__unclassified_g__Prevotellaceae_UCG-003	OTU209	ErHL_21	2.1311	0.00177769
p__Bacteroidetes	c__Bacteroidia	o__Bacteroidales	f__Rikenellaceae	g__Rikenellaceae_RC9_gut_group	s__uncultured_bacterium_g__Rikenellaceae_RC9_gut_group	OTU21	ErHL_21	2.65433	0.00567924
p__Firmicutes	c__Erysipelotrichia	o__Erysipelotrichales	f__Erysipelotrichaceae	g__unclassified_f__Erysipelotrichaceae	s__unclassified_f__Erysipelotrichaceae	OTU217	ErHL_21	2.31677	0.0345016
p__Firmicutes	c__Clostridia	o__Clostridiales	f__Lachnospiraceae	g__unclassified_f__Lachnospiraceae	s__unclassified_f__Lachnospiraceae	OTU232	ErHL_21	2.0544	0.0345016
p__Bacteroidetes	c__Bacteroidia	o__Bacteroidales	f__Bacteroidales_S24-7_group	g__norank_f__Bacteroidales_S24-7_group	s__uncultured_bacterium_g__norank_f__Bacteroidales_S24-7_group	OTU235	ErHL_21	2.25109	0.0216911
p__Bacteroidetes	c__Bacteroidia	o__Bacteroidales	f__Rikenellaceae	g__Rikenellaceae_RC9_gut_group	s__uncultured_bacterium_g__Rikenellaceae_RC9_gut_group	OTU238	ErHL_21	3.06151	0.00205388
p__Firmicutes	c__Clostridia	o__Clostridiales	f__unclassified_o__Clostridiales	g__unclassified_o__Clostridiales	s__unclassified_o__Clostridiales	OTU239	ErHL_21	2.09584	0.00854298
p__Bacteroidetes	c__Bacteroidia	o__Bacteroidales	f__Bacteroidales_S24-7_group	g__norank_f__Bacteroidales_S24-7_group	s__uncultured_bacterium_g__norank_f__Bacteroidales_S24-7_group	OTU241	ErHL_21	2.20675	0.0345016
p__Firmicutes	c__Clostridia	o__Clostridiales	f__Lachnospiraceae	g__unclassified_f__Lachnospiraceae	s__unclassified_f__Lachnospiraceae	OTU242	ErHL_21	2.06686	0.00854298
p__Firmicutes	c__Clostridia	o__Clostridiales	f__Clostridiales_vadinBB60_group	g__norank_f__Clostridiales_vadinBB60_group	s__unclassified_g__norank_f__Clostridiales_vadinBB60_group	OTU245	ErHL_21	2.2896	0.00983885
p__Firmicutes	c__Clostridia	o__Clostridiales	f__Lachnospiraceae	g__Coprococcus_1	s__unclassified_g__Coprococcus_1	OTU247	ErHL_21	2.3114	0.00318818
p__Spirochaetae	c__Spirochaetes	o__Spirochaetales	f__Spirochaetaceae	g__Treponema_2	s__unclassified_g__Treponema_2	OTU248	ErHL_21	2.85604	0.000314533
p__Firmicutes	c__Clostridia	o__Clostridiales	f__Clostridiales_vadinBB60_group	g__norank_f__Clostridiales_vadinBB60_group	s__uncultured_Thermoanaerobacterales_bacterium_g__norank_f__Clostridiales_vadinBB60_group	OTU254	ErHL_21	2.53536	0.00778418
p__Firmicutes	c__Erysipelotrichia	o__Erysipelotrichales	f__Erysipelotrichaceae	g__Erysipelotrichaceae_UCG-004	s__unclassified_g__Erysipelotrichaceae_UCG-004	OTU256	ErHL_21	2.07489	0.00340743
p__Bacteroidetes	c__Bacteroidia	o__Bacteroidales	f__Prevotellaceae	g__Prevotellaceae_NK3B31_group	s__uncultured_bacterium_g__Prevotellaceae_NK3B31_group	OTU257	ErHL_21	2.91824	0.00237564
p__Firmicutes	c__Clostridia	o__Clostridiales	f__Ruminococcaceae	g__Ruminococcaceae_UCG-010	s__uncultured_bacterium_g__Ruminococcaceae_UCG-010	OTU258	ErHL_21	2.24041	0.00460721
p__Tenericutes	c__Mollicutes	o__NB1-n	f__norank_o__NB1-n	g__norank_o__NB1-n	s__unclassified_g__norank_o__NB1-n	OTU259	ErHL_21	2.02861	0.00854298
p__Firmicutes	c__Clostridia	o__Clostridiales	f__Lachnospiraceae	g__Cellulosilyticum	s__uncultured_Cellulosilyticum_sp__g__Cellulosilyticum	OTU26	ErHL_21	2.11988	0.000314533
p__Bacteroidetes	c__Bacteroidia	o__Bacteroidales	f__Bacteroidales_S24-7_group	g__norank_f__Bacteroidales_S24-7_group	s__uncultured_bacterium_g__norank_f__Bacteroidales_S24-7_group	OTU260	ErHL_21	2.24453	0.0417241
p__Bacteroidetes	c__Bacteroidia	o__Bacteroidales	f__Rikenellaceae	g__Rikenellaceae_RC9_gut_group	s__unclassified_g__Rikenellaceae_RC9_gut_group	OTU262	ErHL_21	2.06215	0.0216911
p__Firmicutes	c__Clostridia	o__Clostridiales	f__Ruminococcaceae	g__Ruminococcaceae_UCG-005	s__uncultured_prokaryote_g__Ruminococcaceae_UCG-005	OTU263	ErHL_21	2.68502	0.00540527
p__Firmicutes	c__Clostridia	o__Clostridiales	f__Ruminococcaceae	g__Ruminococcaceae_UCG-013	s__uncultured_bacterium_g__Ruminococcaceae_UCG-013	OTU265	ErHL_21	2.11493	0.00212712
p__Bacteroidetes	c__Bacteroidia	o__Bacteroidales	f__Prevotellaceae	g__Prevotellaceae_NK3B31_group	s__uncultured_bacterium_g__Prevotellaceae_NK3B31_group	OTU272	ErHL_21	2.97186	0.0054461
p__Bacteroidetes	c__Bacteroidia	o__Bacteroidales	f__Bacteroidales_S24-7_group	g__norank_f__Bacteroidales_S24-7_group	s__uncultured_bacterium_g__norank_f__Bacteroidales_S24-7_group	OTU276	ErHL_21	2.26786	0.0012552
p__Proteobacteria	c__Betaproteobacteria	o__Burkholderiales	f__Alcaligenaceae	g__Sutterella	s__uncultured_rumen_bacterium_g__Sutterella	OTU277	ErHL_21	2.22962	0.00854298
p__Firmicutes	c__Clostridia	o__Clostridiales	f__Clostridiales_vadinBB60_group	g__norank_f__Clostridiales_vadinBB60_group	s__unclassified_g__norank_f__Clostridiales_vadinBB60_group	OTU279	ErHL_21	2.37234	0.0156605
p__Bacteroidetes	c__Bacteroidia	o__Bacteroidales	f__Rikenellaceae	g__Rikenellaceae_RC9_gut_group	s__unclassified_g__Rikenellaceae_RC9_gut_group	OTU286	ErHL_21	2.88528	0.000598014
p__Bacteroidetes	c__Bacteroidia	o__Bacteroidales	f__Bacteroidales_RF16_group	g__norank_f__Bacteroidales_RF16_group	s__uncultured_bacterium_g__norank_f__Bacteroidales_RF16_group	OTU288	ErHL_21	2.74477	0.00665382
p__Bacteroidetes	c__unclassified_p__Bacteroidetes	o__unclassified_p__Bacteroidetes	f__unclassified_p__Bacteroidetes	g__unclassified_p__Bacteroidetes	s__unclassified_p__Bacteroidetes	OTU289	ErHL_21	2.54998	0.00217187
p__Bacteroidetes	c__Bacteroidia	o__Bacteroidales	f__Bacteroidales_S24-7_group	g__norank_f__Bacteroidales_S24-7_group	s__uncultured_bacterium_g__norank_f__Bacteroidales_S24-7_group	OTU29	ErHL_21	2.54684	0.00467132
p__Firmicutes	c__Clostridia	o__Clostridiales	f__Clostridiales_vadinBB60_group	g__norank_f__Clostridiales_vadinBB60_group	s__uncultured_bacterium_g__norank_f__Clostridiales_vadinBB60_group	OTU290	ErHL_21	2.23354	0.00179578
p__Bacteroidetes	c__Bacteroidia	o__Bacteroidales	f__Prevotellaceae	g__unclassified_f__Prevotellaceae	s__unclassified_f__Prevotellaceae	OTU291	ErHL_21	3.01613	0.00854298
p__Firmicutes	c__Clostridia	o__Clostridiales	f__Ruminococcaceae	g__Ruminococcaceae_UCG-014	s__gut_metagenome_g__Ruminococcaceae_UCG-014	OTU292	ErHL_21	2.27497	0.0467368
p__Bacteroidetes	c__Bacteroidia	o__Bacteroidales	f__Prevotellaceae	g__Prevotella_1	s__uncultured_bacterium_g__Prevotella_1	OTU295	ErHL_21	2.42888	0.00275703
p__Firmicutes	c__Clostridia	o__Clostridiales	f__Ruminococcaceae	g__Ruminococcaceae_UCG-005	s__unclassified_g__Ruminococcaceae_UCG-005	OTU297	ErHL_21	2.14544	0.00153001
p__Firmicutes	c__Clostridia	o__Clostridiales	f__Ruminococcaceae	g__Ruminiclostridium_1	s__uncultured_organism_g__Ruminiclostridium_1	OTU298	ErHL_21	2.07726	0.0345016
p__Firmicutes	c__Clostridia	o__Clostridiales	f__Clostridiales_vadinBB60_group	g__norank_f__Clostridiales_vadinBB60_group	s__uncultured_bacterium_g__norank_f__Clostridiales_vadinBB60_group	OTU301	ErHL_21	2.14249	0.0242551
p__Firmicutes	c__Clostridia	o__Clostridiales	f__Ruminococcaceae	g__Ruminococcaceae_UCG-013	s__unclassified_g__Ruminococcaceae_UCG-013	OTU302	ErHL_21	2.10597	0.00854298
p__Bacteroidetes	c__Bacteroidia	o__Bacteroidales	f__Prevotellaceae	g__Prevotellaceae_UCG-004	s__uncultured_bacterium_g__Prevotellaceae_UCG-004	OTU308	ErHL_21	2.25438	0.0179678
p__Tenericutes	c__Mollicutes	o__Mollicutes_RF9	f__norank_o__Mollicutes_RF9	g__norank_o__Mollicutes_RF9	s__unclassified_g__norank_o__Mollicutes_RF9	OTU311	ErHL_21	2.19279	0.00854298
p__Bacteroidetes	c__Bacteroidia	o__Bacteroidales	f__Prevotellaceae	g__unclassified_f__Prevotellaceae	s__unclassified_f__Prevotellaceae	OTU312	ErHL_21	2.50486	0.0317173
p__Bacteroidetes	c__Bacteroidia	o__Bacteroidales	f__Bacteroidales_S24-7_group	g__norank_f__Bacteroidales_S24-7_group	s__uncultured_bacterium_g__norank_f__Bacteroidales_S24-7_group	OTU313	ErHL_21	2.19312	0.044357
p__Bacteroidetes	c__Bacteroidia	o__Bacteroidales	f__Bacteroidales_S24-7_group	g__norank_f__Bacteroidales_S24-7_group	s__uncultured_bacterium_g__norank_f__Bacteroidales_S24-7_group	OTU314	ErHL_21	2.39934	0.0230204
p__Bacteroidetes	c__Bacteroidia	o__Bacteroidales	f__unclassified_o__Bacteroidales	g__unclassified_o__Bacteroidales	s__unclassified_o__Bacteroidales	OTU316	ErHL_21	2.55129	0.00394097
p__Bacteroidetes	c__Bacteroidia	o__Bacteroidales	f__Prevotellaceae	g__unclassified_f__Prevotellaceae	s__unclassified_f__Prevotellaceae	OTU319	ErHL_21	2.60213	0.00322017
p__Firmicutes	c__Clostridia	o__Clostridiales	f__unclassified_o__Clostridiales	g__unclassified_o__Clostridiales	s__unclassified_o__Clostridiales	OTU32	ErHL_21	2.3175	0.00854298
p__Bacteroidetes	c__Bacteroidia	o__Bacteroidales	f__Bacteroidales_S24-7_group	g__norank_f__Bacteroidales_S24-7_group	s__uncultured_bacterium_g__norank_f__Bacteroidales_S24-7_group	OTU321	ErHL_21	2.06291	0.00179578
p__Bacteroidetes	c__Bacteroidia	o__Bacteroidales	f__Prevotellaceae	g__unclassified_f__Prevotellaceae	s__unclassified_f__Prevotellaceae	OTU324	ErHL_21	3.62362	0.00177769
p__Bacteroidetes	c__Bacteroidia	o__Bacteroidales	f__unclassified_o__Bacteroidales	g__unclassified_o__Bacteroidales	s__unclassified_o__Bacteroidales	OTU325	ErHL_21	2.00296	0.0267157
p__Firmicutes	c__Clostridia	o__Clostridiales	f__Lachnospiraceae	g__unclassified_f__Lachnospiraceae	s__unclassified_f__Lachnospiraceae	OTU326	ErHL_21	2.09078	0.0345016
p__Bacteroidetes	c__Bacteroidia	o__Bacteroidales	f__Porphyromonadaceae	g__Parabacteroides	s__Porphyromonadaceae_bacterium_DJF_B175	OTU331	ErHL_21	2.51211	0.00148205
p__Spirochaetae	c__Spirochaetes	o__Spirochaetales	f__Spirochaetaceae	g__Treponema_2	s__uncultured_bacterium_g__Treponema_2	OTU335	ErHL_21	3.49219	0.00269753
p__Bacteroidetes	c__Bacteroidia	o__Bacteroidales	f__Rikenellaceae	g__Rikenellaceae_RC9_gut_group	s__uncultured_bacterium_g__Rikenellaceae_RC9_gut_group	OTU339	ErHL_21	2.74967	0.00854298
p__Bacteroidetes	c__Bacteroidia	o__Bacteroidales	f__Rikenellaceae	g__Rikenellaceae_RC9_gut_group	s__wallaby_gut_metagenome_g__Rikenellaceae_RC9_gut_group	OTU340	ErHL_21	2.63243	0.000598014
p__Bacteroidetes	c__Bacteroidia	o__Bacteroidales	f__Bacteroidaceae	g__Bacteroides	s__unclassified_g__Bacteroides	OTU341	ErHL_21	2.08793	0.0287286
p__Bacteroidetes	c__Bacteroidia	o__Bacteroidales	f__Prevotellaceae	g__Prevotella_1	s__uncultured_bacterium_g__Prevotella_1	OTU342	ErHL_21	3.69037	0.0021167
p__Spirochaetae	c__Spirochaetes	o__Spirochaetales	f__Spirochaetaceae	g__Treponema_2	s__uncultured_bacterium_g__Treponema_2	OTU343	ErHL_21	3.98958	0.0116068
p__Spirochaetae	c__Spirochaetes	o__Spirochaetales	f__Spirochaetaceae	g__Treponema_2	s__unclassified_g__Treponema_2	OTU345	ErHL_21	3.73864	0.000598014
p__Spirochaetae	c__Spirochaetes	o__Spirochaetales	f__Spirochaetaceae	g__Treponema_2	s__uncultured_bacterium_g__Treponema_2	OTU346	ErHL_21	3.65511	0.00276668
p__Firmicutes	c__Clostridia	o__Clostridiales	f__Lachnospiraceae	g__Marvinbryantia	s__uncultured_bacterium_g__Marvinbryantia	OTU348	ErHL_21	2.22356	0.00407532
p__Fibrobacteres	c__Fibrobacteria	o__Fibrobacterales	f__Fibrobacteraceae	g__Fibrobacter	s__unclassified_g__Fibrobacter	OTU353	ErHL_21	2.07769	0.00340743
p__Bacteroidetes	c__Bacteroidia	o__Bacteroidales	f__Rikenellaceae	g__Rikenellaceae_RC9_gut_group	s__uncultured_Bacteroidales_bacterium_g__Rikenellaceae_RC9_gut_group	OTU354	ErHL_21	3.07773	0.0142433
p__Bacteroidetes	c__Bacteroidia	o__Bacteroidales	f__Rikenellaceae	g__Rikenellaceae_RC9_gut_group	s__uncultured_bacterium_g__Rikenellaceae_RC9_gut_group	OTU358	ErHL_21	2.99175	0.000821419
p__Firmicutes	c__Clostridia	o__Clostridiales	f__Ruminococcaceae	g__Ruminococcaceae_NK4A214_group	s__uncultured_rumen_bacterium_g__Ruminococcaceae_NK4A214_group	OTU359	ErHL_21	2.97071	0.0118425
p__Firmicutes	c__Erysipelotrichia	o__Erysipelotrichales	f__Erysipelotrichaceae	g__norank_f__Erysipelotrichaceae	s__uncultured_rumen_bacterium_g__norank_f__Erysipelotrichaceae	OTU368	ErHL_21	2.16703	0.0015738
p__Firmicutes	c__Erysipelotrichia	o__Erysipelotrichales	f__Erysipelotrichaceae	g__norank_f__Erysipelotrichaceae	s__uncultured_bacterium_g__norank_f__Erysipelotrichaceae	OTU369	ErHL_21	2.43012	0.00153001
p__Firmicutes	c__Clostridia	o__Clostridiales	f__Ruminococcaceae	g__unclassified_f__Ruminococcaceae	s__unclassified_f__Ruminococcaceae	OTU376	ErHL_21	2.35499	0.000314533
p__Bacteroidetes	c__Bacteroidia	o__Bacteroidales	f__Prevotellaceae	g__Prevotellaceae_UCG-003	s__unclassified_g__Prevotellaceae_UCG-003	OTU380	ErHL_21	2.9692	0.00153001
p__Bacteroidetes	c__Bacteroidia	o__Bacteroidales	f__Prevotellaceae	g__Prevotellaceae_UCG-001	s__uncultured_Bacteroidales_bacterium_g__Prevotellaceae_UCG-001	OTU386	ErHL_21	2.21931	0.0476403
p__Firmicutes	c__Clostridia	o__Clostridiales	f__Ruminococcaceae	g__Anaerotruncus	s__unclassified_g__Anaerotruncus	OTU393	ErHL_21	2.16479	0.00935202
p__Bacteroidetes	c__Bacteroidia	o__Bacteroidales	f__Prevotellaceae	g__unclassified_f__Prevotellaceae	s__unclassified_f__Prevotellaceae	OTU395	ErHL_21	2.28532	0.00259629
p__Firmicutes	c__Clostridia	o__Clostridiales	f__Family_XIII	g__Mogibacterium	s__uncultured_bacterium_g__Mogibacterium	OTU398	ErHL_21	2.44506	0.0133375
p__Firmicutes	c__Clostridia	o__Clostridiales	f__Ruminococcaceae	g__Ruminococcaceae_UCG-014	s__unidentified_rumen_bacterium_JW32	OTU4	ErHL_21	2.23737	0.0345016
p__Firmicutes	c__Clostridia	o__Clostridiales	f__Ruminococcaceae	g__Ruminococcaceae_UCG-014	s__unclassified_g__Ruminococcaceae_UCG-014	OTU404	ErHL_21	2.28287	0.0345016
p__Firmicutes	c__Clostridia	o__Clostridiales	f__Family_XIII	g__Family_XIII_AD3011_group	s__unclassified_g__Family_XIII_AD3011_group	OTU415	ErHL_21	2.20891	0.000598014
p__Spirochaetae	c__Spirochaetes	o__Spirochaetales	f__Spirochaetaceae	g__Treponema_2	s__unclassified_g__Treponema_2	OTU42	ErHL_21	2.33131	0.000872966
p__Firmicutes	c__Erysipelotrichia	o__Erysipelotrichales	f__Erysipelotrichaceae	g__norank_f__Erysipelotrichaceae	s__unclassified_g__norank_f__Erysipelotrichaceae	OTU420	ErHL_21	2.10605	0.0296873
p__Actinobacteria	c__Actinobacteria	o__Coriobacteriales	f__Coriobacteriaceae	g__unclassified_f__Coriobacteriaceae	s__unclassified_f__Coriobacteriaceae	OTU428	ErHL_21	2.23693	0.0343282
p__Firmicutes	c__Clostridia	o__Clostridiales	f__Ruminococcaceae	g__Ruminococcaceae_UCG-010	s__uncultured_bacterium_g__Ruminococcaceae_UCG-010	OTU429	ErHL_21	2.12928	0.00407532
p__Firmicutes	c__Clostridia	o__Clostridiales	f__Lachnospiraceae	g__unclassified_f__Lachnospiraceae	s__unclassified_f__Lachnospiraceae	OTU432	ErHL_21	2.09273	0.00916628
p__Firmicutes	c__Clostridia	o__Clostridiales	f__Lachnospiraceae	g__norank_f__Lachnospiraceae	s__unclassified_g__norank_f__Lachnospiraceae	OTU439	ErHL_21	2.33542	0.000314533
p__Bacteroidetes	c__Bacteroidia	o__Bacteroidales	f__Prevotellaceae	g__Alloprevotella	s__unclassified_g__Alloprevotella	OTU44	ErHL_21	2.5481	0.00854298
p__Firmicutes	c__Clostridia	o__Clostridiales	f__Ruminococcaceae	g__Ruminococcaceae_UCG-013	s__unclassified_g__Ruminococcaceae_UCG-013	OTU443	ErHL_21	2.15838	0.0151716
p__Firmicutes	c__Clostridia	o__Clostridiales	f__Ruminococcaceae	g__Ruminococcus_1	s__unclassified_g__Ruminococcus_1	OTU449	ErHL_21	2.30004	0.00558293
p__Spirochaetae	c__Spirochaetes	o__Spirochaetales	f__Spirochaetaceae	g__Sphaerochaeta	s__unclassified_g__Sphaerochaeta	OTU453	ErHL_21	2.15316	0.0262074
p__Firmicutes	c__Clostridia	o__Clostridiales	f__Ruminococcaceae	g__Ruminococcaceae_UCG-010	s__uncultured_bacterium_g__Ruminococcaceae_UCG-010	OTU466	ErHL_21	2.34437	0.0287286
p__Spirochaetae	c__Spirochaetes	o__Spirochaetales	f__Spirochaetaceae	g__Treponema_2	s__uncultured_bacterium_g__Treponema_2	OTU478	ErHL_21	2.66351	0.0015738
p__Bacteroidetes	c__Bacteroidia	o__Bacteroidales	f__Prevotellaceae	g__Prevotellaceae_UCG-003	s__uncultured_bacterium_g__Prevotellaceae_UCG-003	OTU487	ErHL_21	2.26866	0.00875544
p__Firmicutes	c__Clostridia	o__Clostridiales	f__Christensenellaceae	g__Christensenellaceae_R-7_group	s__uncultured_bacterium_g__Christensenellaceae_R-7_group	OTU492	ErHL_21	2.17803	0.0126151
p__Firmicutes	c__Clostridia	o__Clostridiales	f__Ruminococcaceae	g__Ruminiclostridium_6	s__uncultured_bacterium_g__Ruminiclostridium_6	OTU496	ErHL_21	2.69369	0.0025973
p__Spirochaetae	c__Spirochaetes	o__Spirochaetales	f__Spirochaetaceae	g__Sphaerochaeta	s__uncultured_prokaryote_g__Sphaerochaeta	OTU499	ErHL_21	2.69591	0.00341899
p__Firmicutes	c__Clostridia	o__Clostridiales	f__Christensenellaceae	g__Christensenellaceae_R-7_group	s__uncultured_bacterium_g__Christensenellaceae_R-7_group	OTU50	ErHL_21	2.02269	0.0439952
p__Firmicutes	c__Clostridia	o__Clostridiales	f__Lachnospiraceae	g__Marvinbryantia	s__unclassified_g__Marvinbryantia	OTU501	ErHL_21	2.16987	0.0367376
p__Firmicutes	c__Clostridia	o__Clostridiales	f__Lachnospiraceae	g__Lachnospiraceae_XPB1014_group	s__uncultured_bacterium_g__Lachnospiraceae_XPB1014_group	OTU511	ErHL_21	2.70333	0.004574
p__Bacteroidetes	c__Bacteroidia	o__Bacteroidales	f__Bacteroidaceae	g__Bacteroides	s__unclassified_g__Bacteroides	OTU513	ErHL_21	2.11925	0.000314533
p__Firmicutes	c__Clostridia	o__Clostridiales	f__Ruminococcaceae	g__Ruminiclostridium_6	s__uncultured_bacterium_g__Ruminiclostridium_6	OTU515	ErHL_21	2.76735	0.00148205
p__Firmicutes	c__Clostridia	o__Clostridiales	f__Ruminococcaceae	g__Ruminococcaceae_UCG-010	s__unclassified_g__Ruminococcaceae_UCG-010	OTU52	ErHL_21	2.13094	0.00655212
p__Firmicutes	c__Clostridia	o__Clostridiales	f__Lachnospiraceae	g__[Eubacterium]_xylanophilum_group	s__uncultured_bacterium_g__[Eubacterium]_xylanophilum_group	OTU525	ErHL_21	2.07984	0.0206266
p__Bacteroidetes	c__Bacteroidia	o__Bacteroidales	f__Rikenellaceae	g__Rikenellaceae_RC9_gut_group	s__uncultured_bacterium_g__Rikenellaceae_RC9_gut_group	OTU53	ErHL_21	2.14929	0.00373825
p__Bacteroidetes	c__Bacteroidia	o__Bacteroidales	f__Bacteroidaceae	g__Bacteroides	s__unclassified_g__Bacteroides	OTU531	ErHL_21	2.54938	0.00350587
p__Firmicutes	c__Clostridia	o__Clostridiales	f__Lachnospiraceae	g__[Eubacterium]_eligens_group	s__uncultured_bacterium_g__[Eubacterium]_eligens_group	OTU543	ErHL_21	2.45417	0.0188591
p__Bacteroidetes	c__Bacteroidia	o__Bacteroidales	f__Porphyromonadaceae	g__Parabacteroides	s__Porphyromonadaceae_bacterium_DJF_B175	OTU545	ErHL_21	2.27566	0.0241096
p__Firmicutes	c__Clostridia	o__Clostridiales	f__Lachnospiraceae	g__Lachnospiraceae_UCG-003	s__unclassified_g__Lachnospiraceae_UCG-003	OTU546	ErHL_21	2.76008	0.0143283
p__Bacteroidetes	c__Bacteroidia	o__Bacteroidales	f__Prevotellaceae	g__Prevotellaceae_NK3B31_group	s__uncultured_bacterium_g__Prevotellaceae_NK3B31_group	OTU547	ErHL_21	3.30076	0.00732938
p__Bacteroidetes	c__Bacteroidia	o__Bacteroidales	f__Porphyromonadaceae	g__Parabacteroides	s__Porphyromonadaceae_bacterium_DJF_B175	OTU548	ErHL_21	2.53928	0.0117115
p__Bacteroidetes	c__Bacteroidia	o__Bacteroidales	f__Bacteroidaceae	g__Bacteroides	s__uncultured_bacterium_g__Bacteroides	OTU550	ErHL_21	3.12828	0.0022151
p__Bacteroidetes	c__Bacteroidia	o__Bacteroidales	f__Prevotellaceae	g__Prevotellaceae_NK3B31_group	s__uncultured_bacterium_g__Prevotellaceae_NK3B31_group	OTU551	ErHL_21	2.50463	0.00179578
p__Bacteroidetes	c__Bacteroidia	o__Bacteroidales	f__Prevotellaceae	g__Alloprevotella	s__uncultured_bacterium_g__Alloprevotella	OTU553	ErHL_21	2.35189	0.0347108
p__Bacteroidetes	c__Bacteroidia	o__Bacteroidales	f__Porphyromonadaceae	g__Parabacteroides	s__uncultured_bacterium_g__Parabacteroides	OTU555	ErHL_21	2.83179	0.00667155
p__Verrucomicrobia	c__Verrucomicrobiae	o__Verrucomicrobiales	f__Verrucomicrobiaceae	g__Akkermansia	s__uncultured_bacterium_g__Akkermansia	OTU559	ErHL_21	2.7918	0.000314533
p__Firmicutes	c__Clostridia	o__Clostridiales	f__Ruminococcaceae	g__Oscillibacter	s__uncultured_bacterium_g__Oscillibacter	OTU56	ErHL_21	2.21503	0.0177644
p__Firmicutes	c__Clostridia	o__Clostridiales	f__Ruminococcaceae	g__[Eubacterium]_coprostanoligenes_group	s__unclassified_g__[Eubacterium]_coprostanoligenes_group	OTU563	ErHL_21	2.6595	0.0104899
p__Firmicutes	c__Clostridia	o__Clostridiales	f__Ruminococcaceae	g__Ruminococcaceae_UCG-010	s__unclassified_g__Ruminococcaceae_UCG-010	OTU568	ErHL_21	2.27669	0.0276345
p__Bacteroidetes	c__Bacteroidia	o__Bacteroidales	f__Prevotellaceae	g__Prevotellaceae_NK3B31_group	s__uncultured_bacterium_g__Prevotellaceae_NK3B31_group	OTU569	ErHL_21	2.61033	0.017818
p__Bacteroidetes	c__Bacteroidia	o__Bacteroidales	f__Prevotellaceae	g__Prevotellaceae_NK3B31_group	s__uncultured_bacterium_g__Prevotellaceae_NK3B31_group	OTU571	ErHL_21	2.51961	0.00284231
p__Bacteroidetes	c__Bacteroidia	o__Bacteroidales	f__Bacteroidaceae	g__Bacteroides	s__unclassified_g__Bacteroides	OTU575	ErHL_21	2.78998	0.00114401
p__Bacteroidetes	c__Bacteroidia	o__Bacteroidales	f__Bacteroidales_S24-7_group	g__norank_f__Bacteroidales_S24-7_group	s__uncultured_bacterium_g__norank_f__Bacteroidales_S24-7_group	OTU582	ErHL_21	3.1236	0.00378381
p__Bacteroidetes	c__Bacteroidia	o__Bacteroidales	f__Porphyromonadaceae	g__Parabacteroides	s__Porphyromonadaceae_bacterium_DJF_B175	OTU584	ErHL_21	2.47599	0.00447929
p__Bacteroidetes	c__Bacteroidia	o__Bacteroidales	f__Prevotellaceae	g__Prevotellaceae_NK3B31_group	s__uncultured_bacterium_g__Prevotellaceae_NK3B31_group	OTU587	ErHL_21	2.36666	0.00854298
p__Bacteroidetes	c__Bacteroidia	o__Bacteroidales	f__Porphyromonadaceae	g__Parabacteroides	s__Porphyromonadaceae_bacterium_DJF_B175	OTU6	ErHL_21	2.4594	0.0134061
p__Firmicutes	c__Clostridia	o__Clostridiales	f__Ruminococcaceae	g__Ruminococcaceae_UCG-005	s__unclassified_g__Ruminococcaceae_UCG-005	OTU634	ErHL_21	2.21401	0.0061477
p__Spirochaetae	c__Spirochaetes	o__Spirochaetales	f__Spirochaetaceae	g__Treponema_2	s__unclassified_g__Treponema_2	OTU638	ErHL_21	2.97185	0.0014334
p__Tenericutes	c__Mollicutes	o__Anaeroplasmatales	f__Anaeroplasmataceae	g__Anaeroplasma	s__uncultured_rumen_bacterium_g__Anaeroplasma	OTU640	ErHL_21	2.33246	0.000598014
p__Firmicutes	c__Erysipelotrichia	o__Erysipelotrichales	f__Erysipelotrichaceae	g__Erysipelotrichaceae_UCG-004	s__unclassified_g__Erysipelotrichaceae_UCG-004	OTU642	ErHL_21	2.6469	0.00179578
p__Spirochaetae	c__Spirochaetes	o__Spirochaetales	f__Spirochaetaceae	g__Treponema_2	s__uncultured_bacterium_g__Treponema_2	OTU645	ErHL_21	3.03809	0.0014334
p__Spirochaetae	c__Spirochaetes	o__Spirochaetales	f__Spirochaetaceae	g__Treponema_2	s__unclassified_g__Treponema_2	OTU647	ErHL_21	3.1504	0.000314533
p__Spirochaetae	c__Spirochaetes	o__Spirochaetales	f__Spirochaetaceae	g__Treponema_2	s__uncultured_bacterium_g__Treponema_2	OTU649	ErHL_21	3.79633	0.0010568
p__Spirochaetae	c__Spirochaetes	o__Spirochaetales	f__Spirochaetaceae	g__Treponema_2	s__uncultured_bacterium_g__Treponema_2	OTU650	ErHL_21	3.12724	0.00220808
p__Firmicutes	c__Clostridia	o__Clostridiales	f__Peptococcaceae	g__Peptococcus	s__uncultured_bacterium_g__Peptococcus	OTU657	ErHL_21	3.01099	0.0342431
p__Spirochaetae	c__Spirochaetes	o__Spirochaetales	f__Spirochaetaceae	g__Treponema_2	s__uncultured_bacterium_g__Treponema_2	OTU658	ErHL_21	2.77498	0.000598014
p__Spirochaetae	c__Spirochaetes	o__Spirochaetales	f__Spirochaetaceae	g__Treponema_2	s__uncultured_bacterium_g__Treponema_2	OTU662	ErHL_21	2.64613	0.00589521
p__Spirochaetae	c__Spirochaetes	o__Spirochaetales	f__Spirochaetaceae	g__Sphaerochaeta	s__uncultured_bacterium_g__Sphaerochaeta	OTU666	ErHL_21	2.83513	0.0105825
p__Firmicutes	c__Negativicutes	o__Selenomonadales	f__Veillonellaceae	g__Anaerovibrio	s__unclassified_g__Anaerovibrio	OTU673	ErHL_21	2.90548	0.00189721
p__Spirochaetae	c__Spirochaetes	o__Spirochaetales	f__Spirochaetaceae	g__Sphaerochaeta	s__uncultured_bacterium_g__Sphaerochaeta	OTU684	ErHL_21	2.87318	0.0222143
p__Spirochaetae	c__Spirochaetes	o__Spirochaetales	f__Spirochaetaceae	g__Treponema_2	s__unclassified_g__Treponema_2	OTU687	ErHL_21	2.28407	0.000598014
p__Firmicutes	c__Clostridia	o__Clostridiales	f__Ruminococcaceae	g__Ruminococcaceae_UCG-014	s__uncultured_bacterium_g__Ruminococcaceae_UCG-014	OTU690	ErHL_21	2.00807	0.00854298
p__Verrucomicrobia	c__WCHB1-41	o__norank_c__WCHB1-41	f__norank_c__WCHB1-41	g__norank_c__WCHB1-41	s__uncultured_bacterium_g__norank_c__WCHB1-41	OTU694	ErHL_21	2.29142	0.0345016
p__Firmicutes	c__Clostridia	o__Clostridiales	f__Lachnospiraceae	g__unclassified_f__Lachnospiraceae	s__unclassified_f__Lachnospiraceae	OTU698	ErHL_21	2.20458	0.0368732
p__Bacteroidetes	c__Bacteroidia	o__Bacteroidales	f__Prevotellaceae	g__unclassified_f__Prevotellaceae	s__unclassified_f__Prevotellaceae	OTU70	ErHL_21	3.01859	0.00373825
p__Firmicutes	c__Clostridia	o__Clostridiales	f__Ruminococcaceae	g__Ruminococcaceae_UCG-002	s__uncultured_bacterium_g__Ruminococcaceae_UCG-002	OTU700	ErHL_21	2.03859	0.00817515
p__Spirochaetae	c__Spirochaetes	o__Spirochaetales	f__Spirochaetaceae	g__Sphaerochaeta	s__uncultured_bacterium_g__Sphaerochaeta	OTU710	ErHL_21	2.73989	0.00559911
p__Bacteroidetes	c__Bacteroidia	o__Bacteroidales	f__Prevotellaceae	g__unclassified_f__Prevotellaceae	s__unclassified_f__Prevotellaceae	OTU73	ErHL_21	2.05844	0.0287739
p__Bacteroidetes	c__Bacteroidia	o__Bacteroidales	f__Rikenellaceae	g__Rikenellaceae_RC9_gut_group	s__uncultured_bacterium_g__Rikenellaceae_RC9_gut_group	OTU74	ErHL_21	2.39967	0.0133375
p__Firmicutes	c__Clostridia	o__Clostridiales	f__Ruminococcaceae	g__Ruminococcaceae_UCG-010	s__unclassified_g__Ruminococcaceae_UCG-010	OTU759	ErHL_21	2.10984	0.0157087
p__Actinobacteria	c__Actinobacteria	o__Coriobacteriales	f__Coriobacteriaceae	g__norank_f__Coriobacteriaceae	s__uncultured_bacterium_g__norank_f__Coriobacteriaceae	OTU76	ErHL_21	3.171	0.0183156
p__Firmicutes	c__Clostridia	o__Clostridiales	f__Ruminococcaceae	g__Oscillibacter	s__unclassified_g__Oscillibacter	OTU761	ErHL_21	2.12636	0.0314659
p__Bacteroidetes	c__Bacteroidia	o__Bacteroidales	f__Prevotellaceae	g__Prevotellaceae_NK3B31_group	s__uncultured_bacterium_g__Prevotellaceae_NK3B31_group	OTU77	ErHL_21	2.61473	0.0103064
p__Firmicutes	c__Clostridia	o__Clostridiales	f__Ruminococcaceae	g__Ruminococcaceae_UCG-014	s__unclassified_g__Ruminococcaceae_UCG-014	OTU78	ErHL_21	2.4514	0.0206214
p__Firmicutes	c__Erysipelotrichia	o__Erysipelotrichales	f__Erysipelotrichaceae	g__norank_f__Erysipelotrichaceae	s__unclassified_g__norank_f__Erysipelotrichaceae	OTU786	ErHL_21	2.09126	0.00259629
p__Tenericutes	c__Mollicutes	o__Mollicutes_RF9	f__norank_o__Mollicutes_RF9	g__norank_o__Mollicutes_RF9	s__unclassified_g__norank_o__Mollicutes_RF9	OTU802	ErHL_21	2.39216	0.0297402
p__Firmicutes	c__Clostridia	o__Clostridiales	f__Lachnospiraceae	g__unclassified_f__Lachnospiraceae	s__unclassified_f__Lachnospiraceae	OTU842	ErHL_21	2.64236	0.00566349
p__Firmicutes	c__Clostridia	o__Clostridiales	f__Lachnospiraceae	g__[Eubacterium]_ruminantium_group	s__unclassified_g__[Eubacterium]_ruminantium_group	OTU852	ErHL_21	2.15767	0.0082173
p__Firmicutes	c__Clostridia	o__Clostridiales	f__Clostridiales_vadinBB60_group	g__norank_f__Clostridiales_vadinBB60_group	s__uncultured_bacterium_g__norank_f__Clostridiales_vadinBB60_group	OTU858	ErHL_21	2.01695	0.00787705
p__Firmicutes	c__Clostridia	o__Clostridiales	f__Ruminococcaceae	g__unclassified_f__Ruminococcaceae	s__unclassified_f__Ruminococcaceae	OTU867	ErHL_21	2.17295	0.0496101
p__Firmicutes	c__Clostridia	o__Clostridiales	f__Lachnospiraceae	g__Lachnospiraceae_NK4A136_group	s__unclassified_g__Lachnospiraceae_NK4A136_group	OTU871	ErHL_21	2.31844	0.0329008
p__Firmicutes	c__Clostridia	o__Clostridiales	f__Ruminococcaceae	g__Oscillospira	s__uncultured_bacterium_g__Oscillospira	OTU872	ErHL_21	2.18391	0.00655212
p__Firmicutes	c__Clostridia	o__Clostridiales	f__Lachnospiraceae	g__unclassified_f__Lachnospiraceae	s__unclassified_f__Lachnospiraceae	OTU874	ErHL_21	2.18483	0.0139928
p__Firmicutes	c__Clostridia	o__Clostridiales	f__Lachnospiraceae	g__unclassified_f__Lachnospiraceae	s__unclassified_f__Lachnospiraceae	OTU877	ErHL_21	2.18784	0.0150603
p__Firmicutes	c__Clostridia	o__Clostridiales	f__Clostridiaceae_1	g__Clostridium_sensu_stricto_1	s__Clostridium_butyricum	OTU882	ErHL_21	2.70522	0.0218665
p__Cyanobacteria	c__Cyanobacteria	o__Gastranaerophilales	f__norank_o__Gastranaerophilales	g__norank_o__Gastranaerophilales	s__uncultured_bacterium_g__norank_o__Gastranaerophilales	OTU90	ErHL_21	2.31324	0.046266
p__Firmicutes	c__Clostridia	o__Clostridiales	f__Ruminococcaceae	g__Ruminiclostridium_6	s__gut_metagenome_g__Ruminiclostridium_6	OTU94	ErHL_21	2.85321	0.014181
p__Firmicutes	c__Clostridia	o__Clostridiales	f__Ruminococcaceae	g__Ruminococcus_1	s__unclassified_g__Ruminococcus_1	OTU95	ErHL_21	2.79803	0.00770405
p__Bacteroidetes	c__Bacteroidia	o__Bacteroidales	f__Prevotellaceae	g__Prevotellaceae_UCG-003	s__uncultured_bacterium_g__Prevotellaceae_UCG-003	OTU958	ErHL_21	3.32569	0.00968258
p__Actinobacteria	c__Actinobacteria	o__Coriobacteriales	f__Coriobacteriaceae	g__Enterorhabdus	s__metagenome_g__Enterorhabdus	OTU1034	LLW_21	2.19115	0.0127522
p__unclassified_k__norank	c__unclassified_k__norank	o__unclassified_k__norank	f__unclassified_k__norank	g__unclassified_k__norank	s__unclassified_k__norank	OTU1053	LLW_21	2.36598	0.0287286
p__Firmicutes	c__Clostridia	o__Clostridiales	f__Lachnospiraceae	g__Shuttleworthia	s__uncultured_bacterium_g__Shuttleworthia	OTU110	LLW_21	2.50816	0.0440277
p__Actinobacteria	c__Actinobacteria	o__Coriobacteriales	f__Coriobacteriaceae	g__norank_f__Coriobacteriaceae	s__uncultured_bacterium_g__norank_f__Coriobacteriaceae	OTU1135	LLW_21	2.55127	0.00582668
p__Bacteroidetes	c__Bacteroidia	o__Bacteroidales	f__norank_o__Bacteroidales	g__norank_o__Bacteroidales	s__uncultured_bacterium_g__norank_o__Bacteroidales	OTU1144	LLW_21	2.14365	0.00521077
p__Firmicutes	c__Clostridia	o__Clostridiales	f__Lachnospiraceae	g__Coprococcus_1	s__uncultured_bacterium_g__Coprococcus_1	OTU1152	LLW_21	2.20973	0.00619978
p__Bacteroidetes	c__Bacteroidia	o__Bacteroidales	f__Prevotellaceae	g__unclassified_f__Prevotellaceae	s__unclassified_f__Prevotellaceae	OTU1156	LLW_21	2.09794	0.046858
p__Actinobacteria	c__Actinobacteria	o__Coriobacteriales	f__Coriobacteriaceae	g__norank_f__Coriobacteriaceae	s__human_gut_metagenome_g__norank	OTU1172	LLW_21	2.24199	0.0109357
p__Firmicutes	c__Clostridia	o__Clostridiales	f__Ruminococcaceae	g__Ruminococcaceae_UCG-013	s__unclassified_g__Ruminococcaceae_UCG-013	OTU1175	LLW_21	2.82254	0.0345016
p__Actinobacteria	c__Actinobacteria	o__Coriobacteriales	f__Coriobacteriaceae	g__unclassified_f__Coriobacteriaceae	s__unclassified_f__Coriobacteriaceae	OTU1179	LLW_21	2.4015	0.0345016
p__Firmicutes	c__Clostridia	o__Clostridiales	f__Ruminococcaceae	g__Ruminococcus_1	s__unclassified_g__Ruminococcus_1	OTU1253	LLW_21	2.48911	0.0282277
p__Firmicutes	c__Negativicutes	o__Selenomonadales	f__Veillonellaceae	g__Selenomonas	s__Selenomonas_bovis	OTU1257	LLW_21	3.51873	0.0160583
p__Bacteroidetes	c__Bacteroidia	o__Bacteroidales	f__Prevotellaceae	g__Prevotella_7	s__unclassified_g__Prevotella_7	OTU1268	LLW_21	2.95578	0.00273046
p__Firmicutes	c__Negativicutes	o__Selenomonadales	f__Veillonellaceae	g__norank_f__Veillonellaceae	s__unclassified_g__norank_f__Veillonellaceae	OTU1282	LLW_21	3.11792	0.0436691
p__Firmicutes	c__Negativicutes	o__Selenomonadales	f__Veillonellaceae	g__Allisonella	s__uncultured_bacterium_g__Allisonella	OTU1291	LLW_21	2.27108	0.0227213
p__Firmicutes	c__Negativicutes	o__Selenomonadales	f__Veillonellaceae	g__Megasphaera	s__Megasphaera_elsdenii_DSM_20460	OTU1363	LLW_21	3.77074	0.00294429
p__Firmicutes	c__Clostridia	o__Clostridiales	f__Ruminococcaceae	g__unclassified_f__Ruminococcaceae	s__unclassified_f__Ruminococcaceae	OTU179	LLW_21	2.51353	0.0021167
p__Firmicutes	c__Negativicutes	o__Selenomonadales	f__Acidaminococcaceae	g__Phascolarctobacterium	s__unclassified_g__Phascolarctobacterium	OTU350	LLW_21	3.84027	0.0453399
p__Actinobacteria	c__Actinobacteria	o__Corynebacteriales	f__Corynebacteriaceae	g__Corynebacterium_1	s__Corynebacterium_variabile_g__Corynebacterium_1	OTU372	LLW_21	2.48061	0.00778418
p__Firmicutes	c__Clostridia	o__Clostridiales	f__Lachnospiraceae	g__Blautia	s__unclassified_g__Blautia	OTU401	LLW_21	3.29306	0.00309559
p__Firmicutes	c__Clostridia	o__Clostridiales	f__Ruminococcaceae	g__Ruminococcaceae_NK4A214_group	s__unclassified_g__Ruminococcaceae_NK4A214_group	OTU560	LLW_21	2.2458	0.0207588
p__Firmicutes	c__Clostridia	o__Clostridiales	f__Ruminococcaceae	g__Ruminococcaceae_UCG-014	s__uncultured_Ruminococcaceae_bacterium_g__Ruminococcaceae_UCG-014	OTU579	LLW_21	3.06284	0.0497871
p__Firmicutes	c__Clostridia	o__Clostridiales	f__Peptococcaceae	g__Peptococcus	s__uncultured_bacterium_g__Peptococcus	OTU597	LLW_21	2.64178	0.0140664
p__Firmicutes	c__Negativicutes	o__Selenomonadales	f__Veillonellaceae	g__unclassified_f__Veillonellaceae	s__unclassified_f__Veillonellaceae	OTU616	LLW_21	3.45136	0.0318003
p__Firmicutes	c__Negativicutes	o__Selenomonadales	f__Veillonellaceae	g__norank_f__Veillonellaceae	s__Veillonellaceae_bacterium_DJF_CR19	OTU623	LLW_21	3.54513	0.00481622
p__Firmicutes	c__Negativicutes	o__Selenomonadales	f__Veillonellaceae	g__Mitsuokella	s__Mitsuokella_jalaludinii	OTU625	LLW_21	2.83505	0.0145805
p__Firmicutes	c__Clostridia	o__Clostridiales	f__Ruminococcaceae	g__Ruminococcaceae_UCG-008	s__uncultured_bacterium_g__Ruminococcaceae_UCG-008	OTU664	LLW_21	3.25032	0.0417166
p__Proteobacteria	c__Betaproteobacteria	o__Burkholderiales	f__Alcaligenaceae	g__Sutterella	s__Parasutterella_secunda	OTU672	LLW_21	2.44175	0.0084472
p__Cyanobacteria	c__Cyanobacteria	o__Gastranaerophilales	f__norank_o__Gastranaerophilales	g__norank_o__Gastranaerophilales	s__uncultured_bacterium_g__norank_o__Gastranaerophilales	OTU788	LLW_21	2.25574	0.035563
p__Firmicutes	c__Negativicutes	o__Selenomonadales	f__Acidaminococcaceae	g__Acidaminococcus	s__Acidaminococcus_fermentans_DSM_20731	OTU789	LLW_21	2.21448	0.0212543
p__Spirochaetae	c__Spirochaetes	o__Spirochaetales	f__Spirochaetaceae	g__Treponema_2	s__uncultured_bacterium_g__Treponema_2	OTU816	LLW_21	2.17525	0.0373432
p__Firmicutes	c__Clostridia	o__Clostridiales	f__Ruminococcaceae	g__Butyricicoccus	s__unclassified_g__Butyricicoccus	OTU824	LLW_21	3.08852	0.0221271
p__Elusimicrobia	c__Elusimicrobia	o__Elusimicrobiales	f__Elusimicrobiaceae	g__Elusimicrobium	s__uncultured_bacterium_g__Elusimicrobium	OTU825	LLW_21	2.35889	0.0327696
p__Firmicutes	c__Bacilli	o__Lactobacillales	f__Streptococcaceae	g__Streptococcus	s__Streptococcus_hyointestinalis	OTU83	LLW_21	2.17752	0.0286099
p__Bacteroidetes	c__Bacteroidia	o__Bacteroidales	f__Prevotellaceae	g__Prevotella_7	s__uncultured_bacterium_g__Prevotella_7	OTU832	LLW_21	3.39015	0.00604775
p__Bacteroidetes	c__Bacteroidia	o__Bacteroidales	f__Prevotellaceae	g__unclassified_f__Prevotellaceae	s__unclassified_f__Prevotellaceae	OTU834	LLW_21	2.83077	0.00371635
p__Cyanobacteria	c__Cyanobacteria	o__Gastranaerophilales	f__norank_o__Gastranaerophilales	g__norank_o__Gastranaerophilales	s__uncultured_bacterium_g__norank_o__Gastranaerophilales	OTU839	LLW_21	2.45762	0.00221057
p__Firmicutes	c__Clostridia	o__Clostridiales	f__Lachnospiraceae	g__Roseburia	s__uncultured_Lachnospiraceae_bacterium_g__Roseburia	OTU846	LLW_21	3.28885	0.00285768
p__Firmicutes	c__Clostridia	o__Clostridiales	f__Lachnospiraceae	g__[Eubacterium]_hallii_group	s__unclassified_g__[Eubacterium]_hallii_group	OTU862	LLW_21	2.87302	0.0109478
p__Firmicutes	c__Bacilli	o__Bacillales	f__Staphylococcaceae	g__Staphylococcus	s__unclassified_g__Staphylococcus	OTU876	LLW_21	2.00424	0.0133001
p__Actinobacteria	c__Actinobacteria	o__Coriobacteriales	f__Coriobacteriaceae	g__norank_f__Coriobacteriaceae	s__unclassified_g__norank_f__Coriobacteriaceae	OTU884	LLW_21	2.40971	0.0294131
p__Firmicutes	c__Clostridia	o__Clostridiales	f__Lachnospiraceae	g__Fusicatenibacter	s__unclassified_g__Fusicatenibacter	OTU888	LLW_21	2.78599	0.00766935
p__Bacteroidetes	c__Bacteroidia	o__Bacteroidales	f__Prevotellaceae	g__Prevotellaceae_NK3B31_group	s__human_gut_metagenome_g__Prevotellaceae_NK3B31_group	OTU891	LLW_21	2.81107	0.0109357
p__Firmicutes	c__Erysipelotrichia	o__Erysipelotrichales	f__Erysipelotrichaceae	g__Asteroleplasma	s__uncultured_bacterium_g__Asteroleplasma	OTU903	LLW_21	2.87336	0.00168052
p__Firmicutes	c__Clostridia	o__Clostridiales	f__Lachnospiraceae	g__Lachnoclostridium	s__unclassified_g__Lachnoclostridium	OTU919	LLW_21	2.14943	0.0178682
p__Bacteroidetes	c__Bacteroidia	o__Bacteroidales	f__Bacteroidales_S24-7_group	g__norank_f__Bacteroidales_S24-7_group	s__unclassified_g__norank_f__Bacteroidales_S24-7_group	OTU921	LLW_21	2.31066	0.00483677
p__Firmicutes	c__Clostridia	o__Clostridiales	f__Lachnospiraceae	g__Lachnospiraceae_NK3A20_group	s__unclassified_g__Lachnospiraceae_NK3A20_group	OTU931	LLW_21	2.40685	0.00554443
p__Firmicutes	c__Clostridia	o__Clostridiales	f__Ruminococcaceae	g__Ruminiclostridium_5	s__unclassified_g__Ruminiclostridium_5	OTU932	LLW_21	2.27921	0.0222892
p__Cyanobacteria	c__Cyanobacteria	o__Gastranaerophilales	f__norank_o__Gastranaerophilales	g__norank_o__Gastranaerophilales	s__uncultured_bacterium_g__norank_o__Gastranaerophilales	OTU935	LLW_21	2.04142	0.0239603
p__Tenericutes	c__Mollicutes	o__Mollicutes_RF9	f__norank_o__Mollicutes_RF9	g__norank_o__Mollicutes_RF9	s__uncultured_bacterium_g__norank_o__Mollicutes_RF9	OTU937	LLW_21	2.35514	0.0462836
p__Firmicutes	c__Clostridia	o__Clostridiales	f__Lachnospiraceae	g__Roseburia	s__unclassified_g__Roseburia	OTU940	LLW_21	2.40421	0.0394028
p__Firmicutes	c__Erysipelotrichia	o__Erysipelotrichales	f__Erysipelotrichaceae	g__Erysipelotrichaceae_UCG-004	s__gut_metagenome_g__Erysipelotrichaceae_UCG-004	OTU944	LLW_21	2.81005	0.0345016
p__Bacteroidetes	c__Bacteroidia	o__Bacteroidales	f__Bacteroidales_S24-7_group	g__norank_f__Bacteroidales_S24-7_group	s__uncultured_bacterium_g__norank_f__Bacteroidales_S24-7_group	OTU946	LLW_21	2.10179	0.0330188
p__Bacteroidetes	c__Bacteroidia	o__Bacteroidales	f__Prevotellaceae	g__norank_f__Prevotellaceae	s__uncultured_bacterium_g__norank_f__Prevotellaceae	OTU949	LLW_21	4.01876	0.0450363
p__Firmicutes	c__Clostridia	o__Clostridiales	f__Lachnospiraceae	g__Dorea	s__Dorea_longicatena_g__Dorea	OTU96	LLW_21	3.49808	0.00572025
p__Firmicutes	c__Clostridia	o__Clostridiales	f__Lachnospiraceae	g__unclassified_f__Lachnospiraceae	s__unclassified_f__Lachnospiraceae	OTU978	LLW_21	2.11222	0.0337042
p__Firmicutes	c__Negativicutes	o__Selenomonadales	f__Veillonellaceae	g__Megamonas	s__unclassified_g__Megamonas	OTU1049	SLW_21	3.06952	0.0299792
p__Tenericutes	c__Mollicutes	o__Mollicutes_RF9	f__norank_o__Mollicutes_RF9	g__norank_o__Mollicutes_RF9	s__unclassified_g__norank_o__Mollicutes_RF9	OTU109	SLW_21	2.84459	0.0373432
p__Firmicutes	c__Clostridia	o__Clostridiales	f__Lachnospiraceae	g__unclassified_f__Lachnospiraceae	s__unclassified_f__Lachnospiraceae	OTU1142	SLW_21	2.23784	0.0368119
p__Firmicutes	c__Erysipelotrichia	o__Erysipelotrichales	f__Erysipelotrichaceae	g__Catenibacterium	s__uncultured_bacterium_g__Catenibacterium	OTU1158	SLW_21	3.23973	0.00243218
p__Bacteroidetes	c__Bacteroidia	o__Bacteroidales	f__Bacteroidales_S24-7_group	g__norank_f__Bacteroidales_S24-7_group	s__uncultured_bacterium_g__norank_f__Bacteroidales_S24-7_group	OTU1163	SLW_21	2.33108	0.0113095
p__Bacteroidetes	c__Bacteroidia	o__Bacteroidales	f__Rikenellaceae	g__Rikenellaceae_RC9_gut_group	s__uncultured_bacterium_g__Rikenellaceae_RC9_gut_group	OTU1187	SLW_21	2.5103	0.0139946
p__Firmicutes	c__Clostridia	o__Clostridiales	f__Ruminococcaceae	g__norank_f__Ruminococcaceae	s__unclassified_g__norank_f__Ruminococcaceae	OTU1196	SLW_21	2.54541	0.00683641
p__Proteobacteria	c__Epsilonproteobacteria	o__Campylobacterales	f__Helicobacteraceae	g__Helicobacter	s__unclassified_g__Helicobacter	OTU1199	SLW_21	3.0639	0.00714908
p__Firmicutes	c__Negativicutes	o__Selenomonadales	f__Veillonellaceae	g__Megasphaera	s__unclassified_g__Megasphaera	OTU1200	SLW_21	2.91267	0.00273046
p__Tenericutes	c__Mollicutes	o__Mollicutes_RF9	f__norank_o__Mollicutes_RF9	g__norank_o__Mollicutes_RF9	s__unclassified_g__norank_o__Mollicutes_RF9	OTU1201	SLW_21	2.3643	0.045907
p__Actinobacteria	c__Actinobacteria	o__Coriobacteriales	f__Coriobacteriaceae	g__Slackia	s__Slackia_isoflavoniconvertens	OTU1202	SLW_21	2.43736	0.00483677
p__Firmicutes	c__Clostridia	o__Clostridiales	f__Ruminococcaceae	g__[Eubacterium]_coprostanoligenes_group	s__Eubacterium_coprostanoligenes	OTU1203	SLW_21	3.71192	0.00861383
p__Proteobacteria	c__Gammaproteobacteria	o__Aeromonadales	f__Succinivibrionaceae	g__Succinivibrio	s__unclassified_g__Succinivibrio	OTU1205	SLW_21	3.26652	0.0394028
p__Actinobacteria	c__Actinobacteria	o__Coriobacteriales	f__Coriobacteriaceae	g__Olsenella	s__unclassified_g__Olsenella	OTU1206	SLW_21	2.73805	0.0108968
p__Actinobacteria	c__Actinobacteria	o__Coriobacteriales	f__Coriobacteriaceae	g__Enterorhabdus	s__uncultured_bacterium_g__Enterorhabdus	OTU1207	SLW_21	2.29288	0.0227213
p__Actinobacteria	c__Actinobacteria	o__Coriobacteriales	f__Coriobacteriaceae	g__Collinsella	s__uncultured_bacterium_g__Collinsella	OTU1208	SLW_21	3.41542	0.00432024
p__Firmicutes	c__Clostridia	o__Clostridiales	f__Family_XIII	g__Mogibacterium	s__unclassified_g__Mogibacterium	OTU1211	SLW_21	2.61469	0.0199142
p__Firmicutes	c__Clostridia	o__Clostridiales	f__Ruminococcaceae	g__Ruminococcaceae_UCG-005	s__uncultured_Clostridiales_bacterium_g__Ruminococcaceae_UCG-005	OTU1215	SLW_21	3.08163	0.00977743
p__Bacteroidetes	c__Bacteroidia	o__Bacteroidales	f__Bacteroidales_S24-7_group	g__norank_f__Bacteroidales_S24-7_group	s__uncultured_bacterium_g__norank_f__Bacteroidales_S24-7_group	OTU1220	SLW_21	2.25805	0.0455171
p__Firmicutes	c__Clostridia	o__Clostridiales	f__Lachnospiraceae	g__Lachnospiraceae_FCS020_group	s__unclassified_g__Lachnospiraceae_FCS020_group	OTU1221	SLW_21	2.22842	0.0124609
p__Firmicutes	c__Erysipelotrichia	o__Erysipelotrichales	f__Erysipelotrichaceae	g__Solobacterium	s__uncultured_bacterium_g__Solobacterium	OTU1222	SLW_21	3.26878	0.00205771
p__Firmicutes	c__Clostridia	o__Clostridiales	f__Ruminococcaceae	g__Butyricicoccus	s__unclassified_g__Butyricicoccus	OTU1237	SLW_21	2.79739	0.0265689
p__Firmicutes	c__Bacilli	o__Lactobacillales	f__Lactobacillaceae	g__Lactobacillus	s__unclassified_g__Lactobacillus	OTU1245	SLW_21	2.31844	0.0139035
p__Proteobacteria	c__Epsilonproteobacteria	o__Campylobacterales	f__Campylobacteraceae	g__Campylobacter	s__Campylobacter_jejuni_subsp__jejuni	OTU1252	SLW_21	3.24787	0.0155548
p__Bacteroidetes	c__Bacteroidia	o__Bacteroidales	f__Prevotellaceae	g__Prevotella_7	s__uncultured_bacterium_g__Prevotella_7	OTU1275	SLW_21	2.47867	0.0287286
p__Spirochaetae	c__Spirochaetes	o__Spirochaetales	f__Spirochaetaceae	g__Treponema_2	s__Treponema_succinifaciens_DSM_2489	OTU1287	SLW_21	2.36601	0.0381154
p__Firmicutes	c__Clostridia	o__Clostridiales	f__Ruminococcaceae	g__Ruminococcaceae_UCG-002	s__unclassified_g__Ruminococcaceae_UCG-002	OTU1295	SLW_21	2.34395	0.0196183
p__Bacteroidetes	c__Bacteroidia	o__Bacteroidales	f__Prevotellaceae	g__Alloprevotella	s__unclassified_g__Alloprevotella	OTU1297	SLW_21	2.9891	0.0187439
p__Firmicutes	c__Erysipelotrichia	o__Erysipelotrichales	f__Erysipelotrichaceae	g__Erysipelotrichaceae_UCG-004	s__uncultured_bacterium_g__Erysipelotrichaceae_UCG-004	OTU1300	SLW_21	2.44614	0.00141529
p__Actinobacteria	c__Actinobacteria	o__Coriobacteriales	f__Coriobacteriaceae	g__Senegalimassilia	s__uncultured_bacterium_g__Senegalimassilia	OTU1310	SLW_21	2.59218	0.0231312
p__Firmicutes	c__Clostridia	o__Clostridiales	f__Lachnospiraceae	g__Blautia	s__uncultured_bacterium_g__Blautia	OTU1335	SLW_21	2.5448	0.00589322
p__Firmicutes	c__Bacilli	o__Lactobacillales	f__Lactobacillaceae	g__Lactobacillus	s__unclassified_g__Lactobacillus	OTU1343	SLW_21	2.06806	0.0132516
p__Firmicutes	c__Clostridia	o__Clostridiales	f__Lachnospiraceae	g__Roseburia	s__unclassified_g__Roseburia	OTU140	SLW_21	2.37025	0.010817
p__Proteobacteria	c__Epsilonproteobacteria	o__Campylobacterales	f__Helicobacteraceae	g__Helicobacter	s__unclassified_g__Helicobacter	OTU186	SLW_21	3.33604	0.0342431
p__Bacteroidetes	c__Bacteroidia	o__Bacteroidales	f__Rikenellaceae	g__Rikenellaceae_RC9_gut_group	s__uncultured_bacterium_g__Rikenellaceae_RC9_gut_group	OTU323	SLW_21	2.17729	0.0394028
p__Firmicutes	c__Clostridia	o__Clostridiales	f__Ruminococcaceae	g__Subdoligranulum	s__uncultured_bacterium_g__Subdoligranulum	OTU374	SLW_21	4.06088	0.00362507
p__Firmicutes	c__Erysipelotrichia	o__Erysipelotrichales	f__Erysipelotrichaceae	g__Erysipelotrichaceae_UCG-006	s__uncultured_bacterium_g__Erysipelotrichaceae_UCG-006	OTU385	SLW_21	2.33782	0.00910957
p__Bacteroidetes	c__Bacteroidia	o__Bacteroidales	f__Prevotellaceae	g__unclassified_f__Prevotellaceae	s__unclassified_f__Prevotellaceae	OTU411	SLW_21	2.88681	0.0199128
p__Firmicutes	c__Clostridia	o__Clostridiales	f__Ruminococcaceae	g__Faecalibacterium	s__unclassified_g__Faecalibacterium	OTU452	SLW_21	3.79945	0.00841468
p__Firmicutes	c__Negativicutes	o__Selenomonadales	f__Veillonellaceae	g__Dialister	s__uncultured_bacterium_g__Dialister	OTU631	SLW_21	3.69262	0.00285768
p__Firmicutes	c__Erysipelotrichia	o__Erysipelotrichales	f__Erysipelotrichaceae	g__Asteroleplasma	s__uncultured_bacterium_g__Asteroleplasma	OTU810	SLW_21	2.45886	0.00319217
p__Bacteroidetes	c__Bacteroidia	o__Bacteroidales	f__Bacteroidaceae	g__Bacteroides	s__Bacteroidaceae_bacterium_DJF_B220	OTU813	SLW_21	2.71575	0.0373432
p__Bacteroidetes	c__Bacteroidia	o__Bacteroidales	f__Prevotellaceae	g__Alloprevotella	s__uncultured_organism_g__Alloprevotella	OTU814	SLW_21	2.83584	0.039916
p__Firmicutes	c__Negativicutes	o__Selenomonadales	f__Veillonellaceae	g__Anaerovibrio	s__uncultured_bacterium_g__Anaerovibrio	OTU823	SLW_21	4.27738	0.0077532
p__Firmicutes	c__Clostridia	o__Clostridiales	f__Lachnospiraceae	g__unclassified_f__Lachnospiraceae	s__unclassified_f__Lachnospiraceae	OTU837	SLW_21	4.30612	0.0277423
p__Firmicutes	c__Clostridia	o__Clostridiales	f__Lachnospiraceae	g__[Ruminococcus]_gauvreauii_group	s__unclassified_g__[Ruminococcus]_gauvreauii_group	OTU840	SLW_21	3.03899	0.00300638
p__Firmicutes	c__Clostridia	o__Clostridiales	f__Lachnospiraceae	g__[Eubacterium]_ruminantium_group	s__uncultured_bacterium_g__[Eubacterium]_ruminantium_group	OTU844	SLW_21	2.68798	0.00554443
p__Firmicutes	c__Clostridia	o__Clostridiales	f__Lachnospiraceae	g__Blautia	s__Ruminococcus_sp__5_1_39BFAA	OTU885	SLW_21	3.97624	0.00951419
p__Firmicutes	c__Clostridia	o__Clostridiales	f__Ruminococcaceae	g__Subdoligranulum	s__unclassified_g__Subdoligranulum	OTU887	SLW_21	2.7459	0.00268122
p__Firmicutes	c__Clostridia	o__Clostridiales	f__Family_XIII	g__[Eubacterium]_brachy_group	s__unclassified_g__[Eubacterium]_brachy_group	OTU901	SLW_21	2.81441	0.0439806
p__Actinobacteria	c__Actinobacteria	o__Coriobacteriales	f__Coriobacteriaceae	g__norank_f__Coriobacteriaceae	s__uncultured_bacterium_g__norank_f__Coriobacteriaceae	OTU908	SLW_21	2.36032	0.0311321
p__Firmicutes	c__Clostridia	o__Clostridiales	f__Lachnospiraceae	g__Blautia	s__unclassified_g__Blautia	OTU912	SLW_21	2.90109	0.0489212
p__Firmicutes	c__Clostridia	o__Clostridiales	f__Lachnospiraceae	g__Dorea	s__Dorea_formicigenerans_ATCC_27755	OTU929	SLW_21	3.33108	0.00200866
p__Actinobacteria	c__Actinobacteria	o__Coriobacteriales	f__Coriobacteriaceae	g__Collinsella	s__unclassified_g__Collinsella	OTU938	SLW_21	2.20661	0.0199128
p__Firmicutes	c__Clostridia	o__Clostridiales	f__Lachnospiraceae	g__Oribacterium	s__uncultured_bacterium_g__Oribacterium	OTU941	SLW_21	2.7789	0.0144955
p__Firmicutes	c__Clostridia	o__Clostridiales	f__Lachnospiraceae	g__[Eubacterium]_hallii_group	s__unclassified_g__[Eubacterium]_hallii_group	OTU971	SLW_21	2.16439	0.00627722
p__Firmicutes	c__Clostridia	o__Clostridiales	f__Ruminococcaceae	g__Faecalibacterium	s__unclassified_g__Faecalibacterium	OTU98	SLW_21	2.77345	0.0188591
p__Firmicutes	c__Clostridia	o__Clostridiales	f__Ruminococcaceae	g__Ruminococcaceae_UCG-003	s__unclassified_g__Ruminococcaceae_UCG-003	OTU989	SLW_21	2.25075	0.0256218
ErHL_21 = the cecal samples of Erhualian fattening barrows fed with 21% wheat bran replaced basal diet; LLW_21 = the cecal samples of large Large White pigs fed with 21% wheat bran replaced basal diet; SLW_21 = the cecal samples of small Large White fattening barrows fed with 21% wheat bran replaced basal diet.

## Sheet: Table S5
Effects of varying levels of wheat bran dietary fiber on growth performance, fiber digestibility and gut microbiota in Erhualian and Large White pigs
Taoran Du, Pinghua Li , Qing Niu, Guang Pu, Binbin Wang, Gensheng Liu, Pinghui Li, Peipei Niu, Zongping Zhang, Chengwu Wu, Liming Hou, M.S. Hedemanne and Ruihua Huang*
* Correspondence: Ruihua Huang: rhhuang@njau.edu.cn
Table S5 Selected potential key bacteria which were related to the high fiber digestibility of Erhualian pigs
Genera	Enrichment group
Selecting by breeds
[Anaerorhabdus]_furcosa_group	ErHL_0; ErHL_21
[Bacteroides]_pectinophilus_group	ErHL_7
[Eubacterium]_eligens_group	ErHL_21
[Eubacterium]_nodatum_group	ErHL_0; ErHL_21
[Eubacterium]_ruminantium_group	ErHL_7
Acetitomaculum	ErHL_0
Akkermansia	ErHL_21
Anaeroplasma	ErHL_7; ErHL_21
Anaerovorax	ErHL_0; ErHL_21
Bacteroides	ErHL_0; ErHL_21
Breznakia	ErHL_21
Butyrivibrio	ErHL_21
Candidatus_Hepatincola	ErHL_7
Candidatus_Stoquefichus	ErHL_7; ErHL_21
Cellulosilyticum	ErHL_0; ErHL_7; ErHL_21
Christensenellaceae_R-7_group	ErHL_21
dgA-11_gut_group	ErHL_7
Dielma	ErHL_7
Erysipelotrichaceae_UCG-004	ErHL_7
Family_XIII_AD3011_group	ErHL_7
Fibrobacter	ErHL_21
hoa5-07d05_gut_group	ErHL_7
Howardella	ErHL_7
Hydrogenoanaerobacterium	ErHL_7
Lachnoclostridium	ErHL_0; ErHL_7
Lachnoclostridium_10	ErHL_7
Lachnospiraceae_NK4A136_group	ErHL_7
Lachnospiraceae_UCG-003	ErHL_0; ErHL_7; ErHL_21
Lachnospiraceae_UCG-010	ErHL_0
Lachnospiraceae_XPB1014_group	ErHL_21
Lactobacillus	ErHL_0
Marvinbryantia	ErHL_0
norank_c__WCHB1-41	ErHL_21
norank_f__Bacteroidales_RF16_group	ErHL_0; ErHL_7; ErHL_21
norank_f__Bacteroidales_S24-7_group	ErHL_0; ErHL_21
norank_f__Clostridiales_vadinBB60_group	ErHL_7; ErHL_21
norank_f__Erysipelotrichaceae	ErHL_0; ErHL_7
norank_f__Lachnospiraceae	ErHL_0; ErHL_21
norank_o__Bradymonadales	ErHL_21
norank_o__NB1-n	ErHL_7
Oscillibacter	ErHL_21
Papillibacter	ErHL_21
Parabacteroides	ErHL_0; ErHL_7; ErHL_21
Pasteurella	ErHL_0
Prevotella_1	ErHL_7; ErHL_21
Prevotellaceae_UCG-003	ErHL_0; ErHL_21
Prevotellaceae_UCG-004	ErHL_21
Quinella	ErHL_21
Rikenellaceae_RC9_gut_group	ErHL_0; ErHL_7; ErHL_21
Ruminiclostridium_1	ErHL_21
Ruminiclostridium_6	ErHL_7; ErHL_21
Ruminococcaceae_NK4A214_group	ErHL_0; ErHL_7; ErHL_21
Ruminococcaceae_UCG-001	ErHL_21
Ruminococcaceae_UCG-002	ErHL_7
Ruminococcaceae_UCG-005	ErHL_7
Ruminococcaceae_UCG-010	ErHL_7; ErHL_21
Ruminococcus_1	ErHL_7
Sphaerochaeta	ErHL_21
Treponema_2	ErHL_21
unclassified_f__Erysipelotrichaceae	ErHL_7; ErHL_21
unclassified_f__Porphyromonadaceae	ErHL_0
unclassified_f__Prevotellaceae	ErHL_0; ErHL_21
unclassified_o__Bacteroidales	ErHL_7; ErHL_21
unclassified_o__Clostridiales	ErHL_21
unclassified_p__Bacteroidetes	ErHL_21
Selecting by diets
g__Ruminococcaceae_UCG-008	ErHL_0
g__unclassified_p__Proteobacteria	ErHL_0
g__Lachnospiraceae_NK4B4_group	ErHL_0
g__Elusimicrobium	ErHL_0
g__[Eubacterium]_hallii_group	ErHL_0
g__[Eubacterium]_ventriosum_group	ErHL_0
g__Coprococcus_3	ErHL_0
g__Acetitomaculum	ErHL_0
g__Dorea	ErHL_0
g__Prevotella_7	ErHL_0
g__Anaerofustis	ErHL_0
g__norank_f__Ruminococcaceae	ErHL_7
g__Succinivibrio	ErHL_7
g__[Acetivibrio]_ethanolgignens_group	ErHL_7
g__Slackia	ErHL_7
g__Yersinia	ErHL_7
g__Catenibacterium	ErHL_7
ErHL_0 = the cecal samples of Erhualian fattening barrows fed with basal diet; ErHL_7 = the cecal samples of Erhualian fattening barrows fed with 7% wheat bran replaced basal diet; ErHL_21 = the cecal samples of Erhualian fattening barrows fed with 21% wheat bran replaced basal diet; LLW_0 = the cecal samples of large Large White pigs fed with basal diet; LLW_7 = the cecal samples of large Large …

## Sheet: Table S6
Effects of varying levels of wheat bran dietary fiber on growth performance, fiber digestibility and gut microbiota in Erhualian and Large White pigs
Taoran Du, Pinghua Li , Qing Niu, Guang Pu, Binbin Wang, Gensheng Liu, Pinghui Li, Peipei Niu, Zongping Zhang, Chengwu Wu, Liming Hou, M.S. Hedemanne and Ruihua Huang*
* Correspondence: Ruihua Huang: rhhuang@njau.edu.cn
Table S6 Correlation analysis between the fiber digestibility and SCFAs concentrations of pigs with main microbiota (top 200 OTUs)
Item	OTU	Spearman correlations	P-values	Common OTU	Genus	Phylum
Acetate	OTU1075	-0.329403	0.0310063	OTU1098	Lactobacillus	Firmicutes
Acetate	OTU111	-0.366483	0.0156431	OTU1199	Lactobacillus	Firmicutes
Acetate	OTU1126	0.365311	0.0160039	OTU1287	Helicobacter	Proteobacteria
Acetate	OTU1170	0.418127	0.00526861	OTU153	Treponema_2	Spirochaetae
Acetate	OTU1270	-0.391963	0.00933674	OTU238	Lactobacillus	Firmicutes
Acetate	OTU1319	-0.357841	0.0184736	OTU324	Rikenellaceae_RC9_gut_group	Bacteroidetes
Acetate	OTU1322	-0.352488	0.0204347	OTU343	unclassified_f__Prevotellaceae	Bacteroidetes
Acetate	OTU133	0.4	0.00786865	OTU511	Treponema_2	Spirochaetae
Acetate	OTU153	-0.391961	0.00933711	OTU550	Lachnospiraceae_XPB1014_group	Firmicutes
Acetate	OTU197	-0.353546	0.020034	OTU616	Bacteroides	Bacteroidetes
Acetate	OTU310	-0.337675	0.0267922	OTU623	unclassified_f__Veillonellaceae	Firmicutes
Acetate	OTU374	-0.345604	0.0232111	OTU625	norank_f__Veillonellaceae	Firmicutes
Acetate	OTU435	0.357653	0.0185399	OTU631	Mitsuokella	Firmicutes
Acetate	OTU569	0.309454	0.0434565	OTU824	Dialister	Firmicutes
Acetate	OTU654	0.399834	0.00789688	OTU1006	Butyricicoccus	Firmicutes
Acetate	OTU883	-0.339463	0.0259469
Propionate	OTU1126	0.341979	0.0247951
Propionate	OTU1170	0.316994	0.0383432
Propionate	OTU133	0.351087	0.020976
Propionate	OTU579	0.319133	0.0369859
Propionate	OTU654	0.3386	0.026352
Butyrate	OTU1171	0.385862	0.0106028
Butyrate	OTU133	0.328861	0.0313008
Butyrate	OTU186	0.302069	0.0489887
Butyrate	OTU191	0.32928	0.0310728
Butyrate	OTU252	0.31075	0.0425399
Butyrate	OTU579	0.444369	0.00283332
Butyrate	OTU837	0.407732	0.00664877
Total SCFAs	OTU1126	0.35912	0.0180296
Total SCFAs	OTU1170	0.380363	0.0118671
Total SCFAs	OTU1270	-0.326397	0.0326677
Total SCFAs	OTU133	0.387904	0.0101635
Total SCFAs	OTU153	-0.316453	0.0386931
Total SCFAs	OTU197	-0.335034	0.0280828
Total SCFAs	OTU310	-0.324914	0.0335135
Total SCFAs	OTU374	-0.314418	0.0400313
Total SCFAs	OTU435	0.347301	0.0224991
Total SCFAs	OTU579	0.305763	0.0461541
Total SCFAs	OTU654	0.385697	0.0106388
Total SCFAs	OTU907	0.313813	0.0404368
NDF	OTU1006	0.537904	0.000199141
NDF	OTU1023	0.424757	0.00452478
NDF	OTU1045	0.458274	0.0019989
NDF	OTU1098	0.473573	0.00133859
NDF	OTU1114	0.429307	0.00406896
NDF	OTU1138	-0.432293	0.00379212
NDF	OTU1188	-0.586977	3.51505e-05
NDF	OTU1199	-0.468291	0.00154053
NDF	OTU1222	-0.464207	0.00171474
NDF	OTU1242	0.413478	0.00585156
NDF	OTU1287	-0.428034	0.0041923
NDF	OTU1363	-0.406259	0.0068676
NDF	OTU153	0.428235	0.00417255
NDF	OTU160	0.459935	0.0019154
NDF	OTU177	0.519001	0.000362639
NDF	OTU186	-0.411192	0.00615822
NDF	OTU238	0.517157	0.000383768
NDF	OTU257	0.404613	0.00711961
NDF	OTU272	0.412947	0.00592155
NDF	OTU295	0.408415	0.00654933
NDF	OTU324	0.472181	0.00138939
NDF	OTU335	0.43437	0.0036094
NDF	OTU343	0.428599	0.00413717
NDF	OTU345	0.455774	0.00213054
NDF	OTU346	0.428641	0.00413305
NDF	OTU401	-0.47406	0.0013212
NDF	OTU408	-0.666088	1.08831e-06
NDF	OTU459	0.502251	0.000599501
NDF	OTU487	0.582796	4.11973e-05
NDF	OTU511	0.549036	0.000137564
NDF	OTU550	0.521129	0.000339567
NDF	OTU553	0.433283	0.003704
NDF	OTU575	0.49963	0.000647061
NDF	OTU582	0.500685	0.000627517
NDF	OTU616	-0.459411	0.00194142
NDF	OTU623	-0.523272	0.000317683
NDF	OTU625	-0.509587	0.000482567
NDF	OTU631	-0.517885	0.000375302
NDF	OTU656	-0.448862	0.00253524
NDF	OTU677	-0.422473	0.00476993
NDF	OTU823	-0.435449	0.00351749
NDF	OTU824	-0.546943	0.000147618
NDF	OTU832	-0.460433	0.001891
NDF	OTU837	-0.477952	0.00118935
NDF	OTU846	-0.415775	0.00555694
NDF	OTU888	-0.413436	0.005857
NDF	OTU912	-0.469437	0.00149456
NDF	OTU929	-0.50002	0.000639769
ADF	OTU1006	0.626246	7.06303e-06
ADF	OTU1023	0.419622	0.00509224
ADF	OTU1045	0.450193	0.00245248
ADF	OTU1098	0.577771	4.97139e-05
ADF	OTU1114	0.422196	0.00480048
ADF	OTU1138	-0.419273	0.00513289
ADF	OTU1188	-0.592502	2.84032e-05
ADF	OTU1199	-0.497844	0.000681385
ADF	OTU1222	-0.457806	0.00202294
ADF	OTU1223	-0.429362	0.00406373
ADF	OTU1242	0.458354	0.00199479
ADF	OTU1287	-0.411945	0.00605564
ADF	OTU1319	0.408595	0.00652334
ADF	OTU1321	0.493096	0.000780664
ADF	OTU153	0.530912	0.000249598
ADF	OTU160	0.443808	0.0028726
ADF	OTU177	0.517861	0.000375576
ADF	OTU186	-0.446458	0.0026911
ADF	OTU238	0.508261	0.000502041
ADF	OTU272	0.407311	0.00671065
ADF	OTU324	0.443824	0.00287145
ADF	OTU335	0.424411	0.00456123
ADF	OTU345	0.442279	0.00298213
ADF	OTU346	0.417389	0.00535759
ADF	OTU401	-0.441489	0.00304018
ADF	OTU408	-0.672355	7.90296e-07
ADF	OTU459	0.476991	0.00122079
ADF	OTU478	0.436141	0.00345969
ADF	OTU487	0.600948	2.0348e-05
ADF	OTU511	0.57226	6.0877e-05
ADF	OTU550	0.540735	0.000181482
ADF	OTU553	0.421917	0.00483142
ADF	OTU575	0.516506	0.000391483
ADF	OTU582	0.497117	0.000695801
ADF	OTU616	-0.476396	0.00124061
ADF	OTU623	-0.497124	0.000695675
ADF	OTU625	-0.522368	0.000326756
ADF	OTU631	-0.520068	0.000350902
ADF	OTU654	-0.417026	0.00540187
ADF	OTU656	-0.446956	0.00265813
ADF	OTU823	-0.467319	0.00158053
ADF	OTU824	-0.560825	9.16363e-05
ADF	OTU832	-0.433202	0.00371111
ADF	OTU837	-0.482332	0.00105509
ADF	OTU846	-0.414013	0.00578177
ADF	OTU912	-0.461504	0.00183944
ADF	OTU929	-0.462256	0.00180397
ADF	OTU949	-0.404437	0.00714706
cellulose	OTU1006	0.523558	0.000314859
cellulose	OTU1023	0.463427	0.00174995
cellulose	OTU1098	0.473271	0.00134947
cellulose	OTU1114	0.450186	0.00245287
cellulose	OTU1188	-0.550877	0.000129234
cellulose	OTU1199	-0.4789	0.00115908
cellulose	OTU1203	-0.421311	0.0048991
cellulose	OTU1222	-0.423517	0.00465656
cellulose	OTU1242	0.414762	0.00568517
cellulose	OTU1321	0.447388	0.00262982
cellulose	OTU153	0.419812	0.00507017
cellulose	OTU160	0.456911	0.00206972
cellulose	OTU177	0.509953	0.000477298
cellulose	OTU186	-0.40296	0.00738057
cellulose	OTU238	0.559049	9.75154e-05
cellulose	OTU263	0.418394	0.00523669
cellulose	OTU324	0.466156	0.00162954
cellulose	OTU335	0.442884	0.00293841
cellulose	OTU343	0.40038	0.00780445
cellulose	OTU345	0.4524	0.00232034
cellulose	OTU346	0.436092	0.00346374
cellulose	OTU354	0.42422	0.00458147
cellulose	OTU408	-0.624028	7.77861e-06
cellulose	OTU459	0.463756	0.00173503
cellulose	OTU478	0.480804	0.00110029
cellulose	OTU487	0.56829	7.02852e-05
cellulose	OTU511	0.599659	2.14235e-05
cellulose	OTU550	0.559111	9.73066e-05
cellulose	OTU575	0.487865	0.000904833
cellulose	OTU582	0.464617	0.00169649
cellulose	OTU616	-0.432826	0.00374445
cellulose	OTU623	-0.496431	0.000709664
cellulose	OTU625	-0.495747	0.000723752
cellulose	OTU631	-0.498545	0.00066772
cellulose	OTU656	-0.402047	0.00752826
cellulose	OTU823	-0.46241	0.00179678
cellulose	OTU824	-0.482084	0.00106231
cellulose	OTU832	-0.420752	0.00496232
cellulose	OTU837	-0.50604	0.000536256
cellulose	OTU846	-0.416311	0.00549004
cellulose	OTU912	-0.432943	0.00373405
cellulose	OTU929	-0.42154	0.00487345
hemicellulose	OTU1006	0.484597	0.000991089
hemicellulose	OTU1023	0.460103	0.00190713
hemicellulose	OTU1098	0.426155	0.00438021
hemicellulose	OTU1188	-0.489728	0.000858736
hemicellulose	OTU1199	-0.483295	0.00102744
hemicellulose	OTU1203	-0.41089	0.00619976
hemicellulose	OTU1242	0.431156	0.00389548
hemicellulose	OTU1321	0.454502	0.00220044
hemicellulose	OTU177	0.457643	0.00203143
hemicellulose	OTU238	0.517917	0.000374929
hemicellulose	OTU324	0.434667	0.00358388
hemicellulose	OTU335	0.427756	0.00421964
hemicellulose	OTU343	0.409964	0.00632857
hemicellulose	OTU345	0.411916	0.00605963
hemicellulose	OTU346	0.423015	0.00471075
hemicellulose	OTU397	-0.403626	0.00727445
hemicellulose	OTU408	-0.615268	1.13057e-05
hemicellulose	OTU478	0.427331	0.00426179
hemicellulose	OTU487	0.512283	0.000445022
hemicellulose	OTU511	0.554425	0.000114467
hemicellulose	OTU550	0.499371	0.000651942
hemicellulose	OTU575	0.425554	0.00444194
hemicellulose	OTU582	0.431962	0.00382193
hemicellulose	OTU616	-0.422816	0.0047325
hemicellulose	OTU623	-0.448134	0.0025816
hemicellulose	OTU625	-0.449462	0.00249765
hemicellulose	OTU631	-0.433273	0.00370487
hemicellulose	OTU656	-0.422252	0.00479426
hemicellulose	OTU824	-0.436189	0.00345569
hemicellulose	OTU837	-0.467381	0.00157792
hemicellulose	OTU912	-0.422743	0.00474043
hemicellulose	OTU929	-0.405647	0.00696043
IDF	OTU1006	0.50604	0.000536256
IDF	OTU1023	0.453835	0.0022379
IDF	OTU1098	0.44186	0.00301277
IDF	OTU1114	0.440654	0.00310254
IDF	OTU1138	-0.406632	0.00681161
IDF	OTU1188	-0.528627	0.000268425
IDF	OTU1195	-0.401344	0.00764372
IDF	OTU1199	-0.539596	0.000188411
IDF	OTU1203	-0.448497	0.0025584
IDF	OTU1222	-0.432051	0.0038139
IDF	OTU1242	0.456767	0.00207734
IDF	OTU1252	-0.407557	0.00667436
IDF	OTU1321	0.446783	0.00266956
IDF	OTU1363	-0.407774	0.00664255
IDF	OTU160	0.454663	0.00219148
IDF	OTU177	0.475967	0.00125508
IDF	OTU186	-0.416402	0.00547868
IDF	OTU238	0.576764	5.16021e-05
IDF	OTU263	0.403268	0.00733139
IDF	OTU324	0.492344	0.000797524
IDF	OTU335	0.425779	0.00441868
IDF	OTU343	0.468708	0.00152368
IDF	OTU345	0.433524	0.00368286
IDF	OTU346	0.408874	0.00648318
IDF	OTU397	-0.407177	0.00673055
IDF	OTU401	-0.413527	0.00584507
IDF	OTU408	-0.638602	4.06867e-06
IDF	OTU459	0.426849	0.00431
IDF	OTU478	0.412009	0.00604708
IDF	OTU487	0.518101	0.000372815
IDF	OTU511	0.551161	0.000127993
IDF	OTU550	0.562109	8.7589e-05
IDF	OTU575	0.473423	0.00134397
IDF	OTU582	0.479432	0.00114237
IDF	OTU616	-0.51693	0.000386447
IDF	OTU623	-0.534423	0.000222973
IDF	OTU625	-0.521385	0.000336889
IDF	OTU626	0.414429	0.00572798
IDF	OTU631	-0.496517	0.000707913
IDF	OTU650	0.412518	0.0059787
IDF	OTU656	-0.432851	0.00374224
IDF	OTU823	-0.425329	0.00446512
IDF	OTU824	-0.499835	0.000643225
IDF	OTU832	-0.446296	0.00270194
IDF	OTU837	-0.480822	0.00109978
IDF	OTU846	-0.413094	0.00590217
IDF	OTU912	-0.447752	0.0026062
IDF	OTU929	-0.443184	0.00291686
IDF	OTU949	-0.415369	0.00560795
TDF	OTU1006	0.475385	0.00127493
TDF	OTU1023	0.442884	0.00293841
TDF	OTU1098	0.406524	0.00682785
TDF	OTU1114	0.439747	0.00317165
TDF	OTU1138	-0.400728	0.00774616
TDF	OTU1188	-0.51334	0.000431041
TDF	OTU1199	-0.552402	0.000122689
TDF	OTU1200	-0.418057	0.00527703
TDF	OTU1203	-0.408775	0.00649741
TDF	OTU1222	-0.439519	0.00318923
TDF	OTU1242	0.413176	0.00589132
TDF	OTU1287	-0.40496	0.00706575
TDF	OTU1363	-0.447393	0.00262955
TDF	OTU160	0.446367	0.00269719
TDF	OTU177	0.477791	0.00119456
TDF	OTU186	-0.42048	0.00499326
TDF	OTU188	0.403784	0.00724947
TDF	OTU238	0.567869	7.13574e-05
TDF	OTU295	0.40089	0.00771903
TDF	OTU324	0.497485	0.000688468
TDF	OTU335	0.425703	0.0044265
TDF	OTU343	0.485213	0.000974293
TDF	OTU345	0.435933	0.00347693
TDF	OTU401	-0.416097	0.00551664
TDF	OTU408	-0.625991	7.14203e-06
TDF	OTU459	0.431008	0.00390912
TDF	OTU487	0.483504	0.00102151
TDF	OTU511	0.523535	0.000315087
TDF	OTU550	0.535661	0.000214221
TDF	OTU575	0.460847	0.0018709
TDF	OTU582	0.479587	0.00113754
TDF	OTU616	-0.517586	0.000378756
TDF	OTU623	-0.544421	0.000160616
TDF	OTU625	-0.511553	0.000454922
TDF	OTU631	-0.489811	0.000856729
TDF	OTU650	0.416394	0.00547976
TDF	OTU656	-0.418135	0.00526762
TDF	OTU823	-0.425405	0.00445729
TDF	OTU824	-0.493842	0.000764257
TDF	OTU832	-0.444368	0.0028334
TDF	OTU837	-0.473271	0.00134947
TDF	OTU846	-0.422439	0.00477377
TDF	OTU912	-0.438232	0.00328997
TDF	OTU929	-0.45166	0.00236391
TDF	OTU949	-0.406065	0.00689694
